# Supplementary material
Source: publisher site journal article supplement (https://www.dovepress.com/get_supplementary_file.php?f=355408.xlsx)
Supplement: Supplementary file 1 [file get_supplementary_file.php]

## Sheet: Sheet1
Supplementary Table 1: Differentially expressed genes (DEGs) in the ZnO NPs-treated DLBCL cells compared with untreated DLBCL cells (control cells).
ProbeName	Fold change (Treated versus untreated)	Log fold change (Treated versus untreated)	Regulation (Treated versus untreated)	Untreated DLBCL cells (sample 1)	Untreated DLBCL cells (sample 2)	Untreated DLBCL cells (sample 3)	ZnO NPs- treated DLBCL cells (sample 1)	ZnO NPs- treated DLBCL cells (sample 2)	ZnO NPs- treated DLBCL cells (sample 3)	GeneSymbol	Description	Sequence	EnsemblID	EntrezGeneID	GenbankAccession	GeneName
A_33_P3350056	42.3373	5.40386	up	-2.39958	-2.37312	-2.46742	2.37312	2.63178	3.96655	MT1X	Homo sapiens metallothionein 1X (MT1X), mRNA [NM_005952]	TCCTGTGCCTGTGCCGGCTCCTGCAAATGCAAAGAGTGCAAATGCACCTCCTGCAAGAAG	ENST00000394485	4501	NM_005952	metallothionein 1X
A_23_P111132	15.5796	3.96159	up	-1.59543	-1.49403	-1.82248	2.77259	2.70622	1.49403	HSPA1A	Homo sapiens heat shock 70kDa protein 1A (HSPA1A), mRNA [NM_005345]	GAGCTTCAAGACTTTGCATTTCCTAGTATTTCTGTTTGTCAGTTCTCAATTTCCTGTGTT	ENST00000375651	3303	NM_005345	heat shock 70kDa protein 1A
A_23_P121695	6.70989	2.74629	up	-1.23722	-1.13331	-1.44705	1.83937	1.4486	1.13331	CXCL13	Homo sapiens chemokine (C-X-C motif) ligand 13 (CXCL13), mRNA [NM_006419]	CAAGAGGCAAAGGAATCCATGTAGTAGATATCCTCTGCTTAAAAACTCACTACGGAGGAG	ENST00000286758	10563	NM_006419	chemokine (C-X-C motif) ligand 13
A_21_P0008289	6.46209	2.692	up	-1.22822	-1.13312	-1.2989	1.52918	1.75347	1.13312	BMS1P17	Homo sapiens BMS1 pseudogene 17 (BMS1P17), non-coding RNA [NR_073460]	ATCAGACTAAAGGCAAACAAGGACTCTGTATAAAGTACCGGTGGCATGTGTATTAGTGGA	ENST00000444357	101101776	NR_073460	BMS1 pseudogene 17
A_33_P3298861	3.76442	1.91243	up	-0.810123	-0.769746	-0.930012	1.35243	1.10523	0.769746	SLC12A8	Homo sapiens solute carrier family 12, member 8 (SLC12A8), transcript variant 1, mRNA [NM_024628]	TGACATGGAGATGACTCAGCTCACCCAGGAGAATGCAGACTTCGCCACTCGGGATCGCTA	ENST00000483944	84561	NM_024628	solute carrier family 12, member 8
A_23_P128574	5.44713	2.4455	up	-1.54528	-0.931034	-1.40726	1.38926	1.13262	0.931034	ENOX1	Homo sapiens ecto-NOX disulfide-thiol exchanger 1 (ENOX1), transcript variant 1, mRNA [NM_017993]	GACAGATCTGTTTCCTATGAAAACCAAACAATGATTCCACAGTCATAATGATGGCAAAAT	ENST00000412891	55068	NM_017993	ecto-NOX disulfide-thiol exchanger 1
A_33_P3233645	48.3238	5.59466	up	-3.59963	-2.28444	-2.42447	3.14008	3.05092	2.28444	MT1G	Homo sapiens metallothionein 1G (MT1G), transcript variant 2, mRNA [NM_001301267]	CCCGTAAAATCTAGGATTTTTTGTTTTTTGCTACAATCTTGACCCCTTTGCTACATTCCC	ENST00000379811	4495	NM_001301267	metallothionein 1G
A_21_P0000493	6.97637	2.80248	up	-1.45171	-1.31437	-1.3597	1.40546	1.56183	1.31437	SCARNA14	Homo sapiens small Cajal body-specific RNA 14 (SCARNA14), guide RNA [NR_004388]	TAAAACAGATGGTTCCTGCCGACAGGGTCTGTATAGTTATCAGATTTTCTGTGCGATGGC		692149	NR_004388	small Cajal body-specific RNA 14
A_21_P0014512	7.41615	2.89067	up	-1.19883	-1.11108	-1.34708	1.93834	1.96561	1.11108		Homo sapiens cDNA FLJ40376 fis, clone TESTI2035121. [AK097695]	AGCTTGTAGAAATCTTCAAACTTCCCAGGCTTATGACGGTCCAGAGAGAACCTTCGGAAT			AK097695
A_24_P333663	3.73031	1.8993	up	-0.997422	-0.849039	-0.676079	1.14069	0.676079	1.35858	MAPK6	Homo sapiens mitogen-activated protein kinase 6 (MAPK6), mRNA [NM_002748]	ACTAGTTACTTGGACAAGTTCTTTAGCAGGAAAGAAGATACTGAAATGCTAGAAACTGAG	ENST00000261845	5597	NM_002748	mitogen-activated protein kinase 6
A_23_P106194	6.39665	2.67732	up	-1.41786	-0.972758	-1.23377	1.87962	1.55519	0.972758	FOS	Homo sapiens FBJ murine osteosarcoma viral oncogene homolog (FOS), mRNA [NM_005252]	AGAGGGTTCCTGTAGACCTAGGGAGGACCTTATCTGTGCGTGAAACACACCAGGCTGTGG	ENST00000303562	2353	NM_005252	FBJ murine osteosarcoma viral oncogene homolog
A_23_P114299	7.51404	2.90959	up	-1.28862	-1.53279	-1.46797	1.84558	1.28862	1.30518	CXCR3	Homo sapiens chemokine (C-X-C motif) receptor 3 (CXCR3), transcript variant 1, mRNA [NM_001504]	GTGACTGTGGCCATGGTCCCCAAGACCTCTATATTTGCTCTTTTATTTTTATGTCTAAAA	ENST00000373691	2833	NM_001504	chemokine (C-X-C motif) receptor 3
A_21_P0011609	25.7584	4.68697	up	-2.21317	-2.19925	-2.50397	2.19925	2.5967	2.34856	LOC100130520	PREDICTED: Homo sapiens CD300c molecule-like (LOC100130520), transcript variant X3, mRNA [XM_005275830]	CTGACCCTGACCCTCATATTTCTTTCCATCTTATCACCGGATACTTTTTAAAAGTTAAAA		100130520	XM_005275830	CD300c molecule-like
A_32_P184394	4.63565	2.21277	up	-0.820038	-0.937685	-0.899521	1.74008	1.42094	0.820038	TFEC	Homo sapiens transcription factor EC (TFEC), transcript variant 1, mRNA [NM_012252]	AGTTGCTTATGGCATACAAGGCTAAAATTAATTCAGCTATTTAATCTTAATAATTATTAT	ENST00000320239	22797	NM_012252	transcription factor EC
A_33_P3275315	6.89104	2.78472	up	-1.73558	-1.85077	-1.15415	1.24452	1.21501	1.15415	CELF2-AS1	Homo sapiens CELF2 antisense RNA 1 (CELF2-AS1), long non-coding RNA [NR_126062]	AGAGTGCCAGATACACAGGTGGCATTTTATGGCAGTGGTCACTGGGACCCAACTCCCTTC		414196	NR_126062	CELF2 antisense RNA 1
A_21_P0000310	3.41439	1.77163	up	-0.670615	-0.98199	-0.671444	1.15357	1.16666	0.670615	SNORA12	Homo sapiens small nucleolar RNA, H/ACA box 12 (SNORA12), small nucleolar RNA [NR_002954]	AATATCGGAGATGGCAAAGGCTTGTGACGGAGATATCTCTCTTAAGCCTTTCCTGCATCA		677800	NR_002954	small nucleolar RNA, H/ACA box 12
A_33_P3224307	3.45233	1.78757	up	-0.80983	-0.655027	-0.774707	1.33855	1.12958	0.655027	SCARNA12	Homo sapiens small Cajal body-specific RNA 12 (SCARNA12), guide RNA [NR_003010]	AAATCTTAGTGGTAGTACCTGAGCCATGACTCCCCACTGTAAGGCCAGATCAATAGCATT	ENST00000537646	677777	NR_003010	small Cajal body-specific RNA 12
A_33_P3283619	8.55593	3.09692	up	-1.15577	-1.38334	-2.08723	1.15577	1.33391	2.17476	SH2D1A	Homo sapiens SH2 domain containing 1A (SH2D1A), transcript variant 2, mRNA [NM_001114937]	TATCATGGCAAAATCAGCAGGGAAACCGGCGAGAAGCTCCTGCTTGCCACTGGGCTGGAT	ENST00000494073	4068	NM_001114937	SH2 domain containing 1A
A_23_P427703	27.1047	4.76047	up	-2.04962	-2.11285	-2.11523	2.04962	2.5258	3.4283	MT1L	Homo sapiens metallothionein 1L (gene/pseudogene) (MT1L), non-coding RNA [NR_001447]	CTGCTGTGCCTGATGTGGGGACAGACCTGCTCCCAGATGTAAACAGAGCAACCTGCACAA	ENST00000565768	4500	NR_001447	metallothionein 1L (gene/pseudogene)
A_23_P40174	4.06386	2.02285	up	-0.920294	-0.813073	-0.865613	1.39289	1.26362	0.813073	MMP9	Homo sapiens matrix metallopeptidase 9 (gelatinase B, 92kDa gelatinase, 92kDa type IV collagenase) (MMP9), mRNA [NM_004994]	TGGAGGTGGGCTGGGCCCTCTCTTCTCACCTTTGTTTTTTGTTGGAGTGTTTCTAATAAA	ENST00000372330	4318	NM_004994	matrix metallopeptidase 9 (gelatinase B, 92kDa gelatinase, 92kDa type IV collagenase)
A_33_P3294372	3.09845	1.63155	up	-0.701383	-0.787546	-0.751269	1.13717	0.701383	0.815885	VPS9D1-AS1	Homo sapiens VPS9D1 antisense RNA 1 (VPS9D1-AS1), long non-coding RNA [NR_036480]	TGATCCTTTGTGCAGCGGCTGCTGGCCTCTCAAACTTAATGTGTTCATTGCGGAACTTGC		100128881	NR_036480	VPS9D1 antisense RNA 1
A_23_P256504	16.3665	4.03267	up	-2.02847	-1.85928	-1.90538	2.41891	2.02671	1.85928	AMBP	Homo sapiens alpha-1-microglobulin/bikunin precursor (AMBP), mRNA [NM_001633]	ACGGTAACAACTTCGTCACAGAAAAGGAGTGTCTGCAGACCTGCCGAACTGTGGCGGCCT	ENST00000265132	259	NM_001633	alpha-1-microglobulin/bikunin precursor
A_21_P0004421	30.7104	4.94065	up	-2.72265	-3.53725	-1.80194	2.59676	2.36142	1.80194	LUCAT1	Homo sapiens lung cancer associated transcript 1 (non-protein coding) (LUCAT1), transcript variant 1, long non-coding RNA [NR_103548]	GGATGCCAGTATTCTCATCCCCTCACAAATAAAGAGCCTTCAAGCTCTTGCAGTCAACAA	ENST00000511918	100505994	NR_103548	lung cancer associated transcript 1 (non-protein coding)
A_23_P120883	10.9863	3.45763	up	-1.51452	-1.63435	-1.63803	2.07292	1.99855	1.51452	HMOX1	Homo sapiens heme oxygenase (decycling) 1 (HMOX1), mRNA [NM_002133]	TGGGGAGGGAGGTGTTTAACGGCACTGTGGCCTTGGTCTAACTTTTGTGTGAAATAATAA	ENST00000216117	3162	NM_002133	heme oxygenase (decycling) 1
A_21_P0000350	4.77246	2.25473	up	-0.807069	-1.14897	-1.14621	1.44423	1.41065	0.807069	SCARNA20	Homo sapiens small Cajal body-specific RNA 20 (SCARNA20), guide RNA [NR_002999]	GAGGATCGTCGTCAGGACTGCCACGAGTGGGGCAGCCTTGTTTTCCTGCCTCAGACATGT		677681	NR_002999	small Cajal body-specific RNA 20
A_21_P0004689	50.6776	5.66328	up	-2.45272	-2.38216	-2.32787	2.95881	2.32787	4.54041	lnc-MYB-1	BY994446 full-length enriched Human Mast Cell cDNA library Homo sapiens cDNA clone MCN0796 5', mRNA sequence [BY994446]	TACATGATAGAGTGGAAGCCACAAAGGAAGAAGAAGAAGAGATTCTATCTGGGTATGGAG				lnc-MYB-1:1
A_33_P3227472	5.15909	2.36712	up	-0.949183	-0.973993	-1.0976	1.45264	1.67875	0.949183	SDSL	Homo sapiens serine dehydratase-like (SDSL), mRNA [NM_138432]	CTCCTGGACTGCTTCTTTTGGCTCTCCGACAACTCCGGCCAATAAACACTTTCTGAATTG	ENST00000403593	113675	NM_138432	serine dehydratase-like
A_33_P3338360	3.68087	1.88005	up	-0.711788	-0.709245	-0.651303	1.48704	1.42946	0.651303	SCARNA13	Homo sapiens small Cajal body-specific RNA 13 (SCARNA13), guide RNA [NR_003002]	GTCGAGATATTGTTTAGCAGATGGAGTGTTTTCTGTTGAACACTAAGTACTGCCACAAGT		677768	NR_003002	small Cajal body-specific RNA 13
A_23_P37983	30.8398	4.94672	up	-2.1755	-2.24968	-2.27092	2.1755	2.31218	3.65638	MT1B	Homo sapiens metallothionein 1B (MT1B), mRNA [NM_005947]	TCATCAGAGAAGTGCCGCTGCTGTGCCTGATGTTGGGAGAGCCCTGCTCCCAGACATAAA	ENST00000334346	4490	NM_005947	metallothionein 1B
A_21_P0000356	21.9512	4.45623	up	-1.9253	-2.42719	-2.45297	2.31183	2.32609	1.9253	SCARNA11	Homo sapiens small Cajal body-specific RNA 11 (SCARNA11), guide RNA [NR_003012]	TCAGTTTAGGAGGGCCGTCCTAAGAATAGGGCTGGCTCTTAAAGGCACGAGAGGACAATT		677780	NR_003012	small Cajal body-specific RNA 11
A_21_P0011780	3.44198	1.78324	up	-1.28747	-0.650135	-0.999373	0.957063	0.650135	0.805541	LINC01534	Homo sapiens long intergenic non-protein coding RNA 1534 (LINC01534), transcript variant 2, long non-coding RNA [NR_110708]	TAAGAGCAACTTGCTTGCGCATTAAAGATCACTTGGAGAGAGAGGTCCAGTGAGCAACAA	ENST00000433232	101927621	NR_110708	long intergenic non-protein coding RNA 1534
A_21_P0009476	8.83013	3.14243	up	-1.28244	-1.40646	-1.36154	1.28244	1.61633	2.4781	lnc-KATNAL2-4	LNCipedia lincRNA (lnc-KATNAL2-4), lincRNA [lnc-KATNAL2-4:1]	ACTCTTAGCTCCTGTGCCCTGTGCATCCTGGTGTTCGTGCACGTGCTGCACGGATCATTT				lnc-KATNAL2-4:1
A_21_P0001923	3.27229	1.7103	up	-0.551318	-0.78739	-0.8569	1.27984	0.551318	1.10414			TGCCGGATATGAGAGAGAGAGAGAGATTTGACTGGGCTAAGAAAGAAATGAACACGATTT	ENST00000450667
A_21_P0011221	5.06804	2.34143	up	-1.18853	-0.852129	-1.07934	1.56053	1.49163	0.852129	LINC00463	Homo sapiens long intergenic non-protein coding RNA 463 (LINC00463), long non-coding RNA [NR_120428]	CATACGTCATTTATAAAACGCCAACTTATGTGGATGGGGATTGGGATTTATTGGCCTAAT	ENST00000413501	101928922		long intergenic non-protein coding RNA 463
A_33_P3368313	159.074	7.31356	up	-4.72899	-4.72785	-2.90671	3.47866	3.19175	2.90671	MT1H	Homo sapiens metallothionein 1H (MT1H), mRNA [NM_005951]	TGTCGGGACAGCCCTGCTGTCAGATGAAAACAGAATGACACGTAAAATCCAGGATTTTTT	ENST00000332374	4496	NM_005951	metallothionein 1H
A_23_P81898	3.59855	1.84742	up	-0.680528	-0.660393	-0.84775	1.32461	1.36858	0.660393	UBD	Homo sapiens ubiquitin D (UBD), mRNA [NM_006398]	ATTTGGGTGGGATGGGTAGGATGAAGTATATTGCCCAACTCTATGTTTCTTTGATTCTAA	ENST00000355973	10537	NM_006398	ubiquitin D
A_33_P3400728	3.21375	1.68426	up	-0.929081	-0.82613	-0.640536	0.640536	1.03656	0.97993	RIPK4	Homo sapiens receptor-interacting serine-threonine kinase 4 (RIPK4), mRNA [NM_020639]	CGGGGCACACGAGCACTGCCAGGCTGCTCCTGCATCGGGGCGCTGGCAAGGAGGCCATGA	ENST00000352483	54101	NM_020639	receptor-interacting serine-threonine kinase 4
A_21_P0007929	4.12125	2.04308	up	-0.682223	-0.899551	-0.793993	1.51693	0.682223	1.55433	lnc-RP11-90M5.1.1-2	LNCipedia lincRNA (lnc-RP11-90M5.1.1-2), lincRNA [lnc-RP11-90M5.1.1-2:1]	AGATACATGTAAAATTTGAATTTTAGCCAGAGCAGAGATGCCAGCCCTGACCCTGATCCC				lnc-RP11-90M5.1.1-2:1
A_33_P3304402	11.3348	3.50268	up	-1.53142	-1.42753	-1.89324	1.42753	2.69547	1.53286			AGCTCTGATATGAGAGCACGTGTCTACTCAGCACTGAGAGTGGTGCTCAGGGCTGCCTGT
A_23_P331748	3.40306	1.76683	up	-0.743192	-0.925512	-0.554177	1.3211	1.20234	0.554177	CD33	Homo sapiens CD33 molecule (CD33), transcript variant 1, mRNA [NM_001772]	GGGACCAAAGGCTGATTCTTGGAGATTTAACTCCCCACAGGCAATGGGTTTATAGACATT	ENST00000421133	945	NM_001772	CD33 molecule
A_23_P16384	13.6125	3.76686	up	-1.49277	-1.94988	-1.58358	2.41788	2.3637	1.49277	NLRP7	Homo sapiens NLR family, pyrin domain containing 7 (NLRP7), transcript variant 1, mRNA [NM_139176]	ATCGCTCTACGAATTACACAGGAAGCGGGATTCGGGTCTCTAAGATGTCTTATGAATGCA	ENST00000592784	199713	NM_139176	NLR family, pyrin domain containing 7
A_23_P321501	18.2441	4.18936	up	-2.05176	-1.81642	-1.90059	2.62476	2.35813	1.81642	DHRS2	Homo sapiens dehydrogenase/reductase (SDR family) member 2 (DHRS2), transcript variant 1, mRNA [NM_182908]	CCAGGAGCCTGAGGGGGTGTCTAGGTGATCATTTGGATCTGGAGCAGAGTCTGCCATTCT	ENST00000556701	10202	NM_182908	dehydrogenase/reductase (SDR family) member 2
A_33_P3288219	4.66175	2.22087	up	-0.860303	-1.13982	-0.846153	1.59149	1.3787	0.846153		Homo sapiens cDNA FLJ45684 fis, clone FCBBF3005160. [AK127589]	CAGTTTCAGACACCGTGTGCATATTTCCGACGTCTGCTGTAACAAAAGACCACAAAGTTG			AK127589
A_33_P3300232	10.6601	3.41415	up	-1.27199	-1.15432	-1.58692	2.70844	2.36644	1.15432	HYDIN	Homo sapiens HYDIN, axonemal central pair apparatus protein (HYDIN), transcript variant 1, mRNA [NM_001270974]	TGGAGTCTTGGATCCTGGTGAGAAGTCCAACGTGCAAGTGAAATTCATGCCAAAAGAAGA	ENST00000543521	54768	NM_001270974	HYDIN, axonemal central pair apparatus protein
A_33_P3246528	6.05045	2.59704	up	-1.82439	-1.00287	-1.29557	1.44126	1.22417	1.00287	CCDC114	Homo sapiens coiled-coil domain containing 114 (CCDC114), mRNA [NM_144577]	AAACTGTCCCAGCTGATGGGGGAGAGTGACCCTGACCTGTTGGTGCAGAAGTATCTGGAG	ENST00000315396	93233	NM_144577	coiled-coil domain containing 114
A_23_P115200	3.61053	1.85221	up	-0.676996	-0.873245	-0.883919	1.44052	1.00496	0.676996	FCRL4	Homo sapiens Fc receptor-like 4 (FCRL4), mRNA [NM_031282]	AGGCTGCGCTTCCAAAAGCAAATGATAATTATGTTAATGTCATTAGTGACAAAGATTTGC	ENST00000448509	83417	NM_031282	Fc receptor-like 4
A_23_P66241	15.8695	3.98819	up	-2.00274	-1.92322	-2.11082	1.97723	2.02732	1.92322	MT1M	Homo sapiens metallothionein 1M (MT1M), mRNA [NM_176870]	TTTTTTCAATACGATACTGAGCCATTTGCTGCATTTCTTTTTATGTTAAATATGTGAGTG	ENST00000379818	4499	NM_176870	metallothionein 1M
A_21_P0006814	4.13178	2.04676	up	-0.653342	-1.08146	-1.33567	1.03843	0.653342	1.37804	lnc-PFKP-8	LNCipedia lincRNA (lnc-PFKP-8), lincRNA [lnc-PFKP-8:1]	CTCAGCCTGTCTTCTCTATTTCTGTTCTGACTGTCTTAGTAATAATAGTAGATACAACTT				lnc-PFKP-8:1
A_24_P941166	3.50661	1.81008	up	-0.59613	-0.664347	-0.905642	1.38269	1.28529	0.59613	ZNF425	Homo sapiens zinc finger protein 425 (ZNF425), mRNA [NM_001001661]	CACTGATCTGCTAGTCCAACGATCTCTTCAGTGTCATCCAATAATCCCTTCATTAAATTC	ENST00000378061	155054	NM_001001661	zinc finger protein 425
A_23_P5654	6.63519	2.73014	up	-1.62431	-1.16863	-1.59341	1.16863	1.18688	1.44854	IL37	Homo sapiens interleukin 37 (IL37), transcript variant 1, mRNA [NM_014439]	GGATGGTTCATCTGCACCTCCTGCAATTGTAATGAGCCTGTTGGGGTGACAGATAAATTT	ENST00000263326	27178	NM_014439	interleukin 37
A_21_P0013394	7.2813	2.8642	up	-1.47967	-1.35006	-0.925998	2.02783	1.88303	0.925999	LOC102723946		GTAAAAACTTAGATAATGCTGTCTGAAATACTTAACTCCTGGTCAAATGCAGCTGCTATT	ENST00000438538	102723946		uncharacterized LOC102723946
A_24_P75190	3.38674	1.7599	up	-0.769192	-0.658748	-1.04238	1.16718	0.983451	0.658748	HBD	Homo sapiens hemoglobin, delta (HBD), mRNA [NM_000519]	TGATGGCCTGGCTCACCTGGACAACCTCAAGGGCACTTTTTCTCAGCTGAGTGAGCTGCA	ENST00000429817	3045	NM_000519	hemoglobin, delta
A_33_P3231156	113.073	6.82111	up	-3.14537	-3.40936	-3.57779	3.22141	3.14537	3.96401		metallothionein 1C, pseudogene [Source:HGNC Symbol;Acc:HGNC:7395] [ENST00000567054]	TCCTGCACTTATGCCAGCTTCTGCAAATGCAAAGAGTACAAATGCACCTCTTGCAAGAAG	ENST00000567054
A_24_P68908	55.1936	5.78643	up	-2.90462	-2.42273	-3.13604	3.31945	3.1537	2.42273	LOC344887	Homo sapiens NmrA-like family domain containing 1 pseudogene (LOC344887), non-coding RNA [NR_033752]	CATCATATTGTAATCGTCTTATTTGCTAGTTTTCTTCCTTACTGTGAGTGACTAACAGTC	ENST00000423298	344887		NmrA-like family domain containing 1 pseudogene
A_33_P3259028	3.11712	1.64022	up	-0.977602	-0.699437	-0.920649	0.849203	0.699437		TRIM24	tripartite motif containing 24 [Source:HGNC Symbol;Acc:HGNC:11812] [ENST00000343526]	ATAAGTTCCTCTGAAAGGGACTCGTTTTTGTGGTTTTCATCTGTCTATAATTTGGAATGA	ENST00000343526	8805	AK127592	tripartite motif containing 24
A_23_P312874	4.93109	2.30191	up	-0.932121	-1.30819	-1.59586	0.932121	1.12872	1.00871	SPATS1	Homo sapiens spermatogenesis associated, serine-rich 1 (SPATS1), mRNA [NM_145026]	CAAAGCAGGATCAATGCTCCCACCAGTGAATTTTTCAATAGTGCCTTATGAAAAGAAATT	ENST00000506468	221409	NM_145026	spermatogenesis associated, serine-rich 1
A_32_P217750	8.30986	3.05482	up	-1.7665	-1.68395	-0.953287	1.94628	1.86117	0.953288	IL3RA	Homo sapiens interleukin 3 receptor, alpha (low affinity) (IL3RA), transcript variant 1, mRNA [NM_002183]	GAGATGCCTGTGTAATTTCGTCCGAAGCTGCCAGGAAGAAGAACAGAACTTTGTGTGTTT	ENST00000331035	3563	NM_002183	interleukin 3 receptor, alpha (low affinity)
A_21_P0011622	5.67133	2.50369	up	-1.12111	-1.01595	-1.24054	1.31679	1.01595	1.80073		Q6N0F2_RHOPA (Q6N0F2) Predicted permease precursor, partial (4%) [THC2664106]	TTGCTCTATCTTCATTTTCCCTTTAGTACTTTTCTCCCTATCTTTCATCTCACTTACACT	ENST00000495536
A_19_P00321398	7.63186	2.93203	up	-1.15985	-1.39708	-1.91507	1.828	1.15985	1.33625			TTTTCAAAAAGCTGATGCCTCAGAGGAAAAAGAAAGCAAAGCCCTGTACCCTGACTCGAG	ENST00000522967
A_21_P0012695	7.32945	2.87371	up	-1.34995	-1.22905	-1.6963	1.53522	1.58154	1.22905	XLOC_l2_011350	BROAD Institute lincRNA (XLOC_l2_011350), lincRNA [TCONS_l2_00021387]	ATTCTGTTAGAAAACCAAACACATGAAGAGCCCAATCAACACCCTGGGAGAACGAGGCAT
A_21_P0004123	12.397	3.63192	up	-1.15435	-2.28551	-2.374	1.94482	1.98273	1.15435	LINC01265	Homo sapiens long intergenic non-protein coding RNA 1265 (LINC01265), long non-coding RNA [NR_104631]	GTGGTGCTGACTTTCCGACTCAGAATATGATCACATGTTTTTCTCATTAAAACTATATTG	ENST00000506463	101926904		long intergenic non-protein coding RNA 1265
A_23_P143143	3.36607	1.75107	up	-0.795992	-0.631989	-0.651485	1.18757	1.35417	0.631989	ID2	Homo sapiens inhibitor of DNA binding 2, dominant negative helix-loop-helix protein (ID2), mRNA [NM_002166]	AGGCTTCTGAATTCCCTTCTGAGTTAATGTCAAATGACAGCAAAGCACTGTGTGGCTGAA	ENST00000331129	3398	NM_002166	inhibitor of DNA binding 2, dominant negative helix-loop-helix protein
A_21_P0008307	3.34888	1.74368	up	-1.1597	-1.03824	-0.631051	0.685324	0.631051	1.08567	LOC102724890	PREDICTED: Homo sapiens uncharacterized LOC102724890 (LOC102724890), transcript variant X2, ncRNA [XR_424484]	ATTTTCCCTGGTCCCAGAAGGCTGCATATGGAACTGACCTGGACTTAATCTACAAGATAG		102724890	XR_424484	uncharacterized LOC102724890
A_23_P54840	8.82743	3.14199	up	-1.28292	-1.44104	-1.55828	1.28292	1.44304	2.41779	MT1A	Homo sapiens metallothionein 1A (MT1A), mRNA [NM_005946]	AAATGCAACTCCTGCAAGAAGAGCTGCTGCTCCTGCTGCCCCATGAGCTGTGCCAAGTGT	ENST00000290705	4489	NM_005946	metallothionein 1A
A_21_P0007321	3.4953	1.80542	up	-0.579504	-0.791114	-0.955598	1.15127	0.579504	1.35926	lnc-SOX6-1	LNCipedia lincRNA (lnc-SOX6-1), lincRNA [lnc-SOX6-1:1]	TGTTGAATTCCTTAAGGTGTCTGGAAAAAGAGAGAGAGAGAGCCAAAGAGGAAGAGGGGA				lnc-SOX6-1:1
A_33_P3215640	3.2525	1.70155	up	-0.711702	-0.969954	-0.646695	1.29016	0.839446	0.646695	PI16	Homo sapiens peptidase inhibitor 16 (PI16), transcript variant 1, mRNA [NM_153370]	AGGGACGAGGGAAGGAAAGTAACTCCTGACTCTCCAATAAAAACCTGTCCAACCTGTGGC	ENST00000611814	221476	NM_153370	peptidase inhibitor 16
A_33_P3397920	3.73421	1.9008	up	-0.754068	-0.721171	-1.2057	0.72117	0.949191	1.35111			CACTGCTAAGCAAGCTGGGAGCTTTGCCAAGGCCAAAATAAATTAAATTATGGTACGGTT	ENST00000439964
A_21_P0011733	5.14784	2.36397	up	-1.14356	-1.03603	-1.20808	1.10857	1.55963	1.03603	LOC100505851	PREDICTED: Homo sapiens uncharacterized LOC100505851 (LOC100505851), misc_RNA [XR_109588]	TCAATAAATACTTGGCAGATGAATCTTAAAGCAGCACTGTCTTGGAGGAGCTGCTCCCCT		100505851	XR_109588	uncharacterized LOC100505851
A_21_P0006936	4.64303	2.21507	up	-0.907228	-1.26429	-1.04185	0.94718	1.57743	0.907227	lnc-GLRX3-3	LNCipedia lincRNA (lnc-GLRX3-3), lincRNA [lnc-GLRX3-3:2]	TAAAGGACTGCGAGGTTCCACTGCCCAGGGCTGTCTAACCGCTTGCTTTAGACTGTGGGT				lnc-GLRX3-3:2
A_33_P3315314	31.4182	4.97353	up	-2.2015	-2.25954	-2.29534	2.2015	2.59378	3.36891	MT1HL1	Homo sapiens metallothionein 1H-like 1 (MT1HL1), mRNA [NM_001276687]	AGTGCAAAAAGTGCAAATGCACCTCCTGCAAGAAGAGCTGCTGCTCCTGTTGCCCCCTGG	ENST00000464121	645745	NM_001276687	metallothionein 1H-like 1
A_33_P3632937	3.74418	1.90465	up	-0.674741	-0.796266	-0.678615	1.40255	1.48704	0.674741	LOC100131262	PREDICTED: Homo sapiens uncharacterized LOC100131262 (LOC100131262), misc_RNA [XR_132952]	TACCATGTTGCGTGCTGGGTGTTTTAGCATTTTTATAAATCATCTTAATCTTTGTTCTGG		100131262	XR_132952	uncharacterized LOC100131262
A_23_P321959	3.11121	1.63747	up	-0.478883	-0.75152	-0.788466	1.09865	0.830389		SFT2D1	Homo sapiens SFT2 domain containing 1 (SFT2D1), transcript variant 1, mRNA [NM_145169]	CGTTTTCTTTTCTATTCTTGGAACTGGATTGCTGTGGCTTCCGGGCGGCATAAAGCTTTT	ENST00000478705	113402	NM_145169	SFT2 domain containing 1
A_23_P15174	4403.31	12.1044	up	-6.70595	-5.77587	-6.26141	5.91108	5.88294	5.77587	MT1F	Homo sapiens metallothionein 1F (MT1F), transcript variant 1, mRNA [NM_005949]	TGCCAGGACAACCTTTCTCCCAGATGTAAACAGAGAGACATGTACAAACCTGGATTTTTT	ENST00000564295	4494	NM_005949	metallothionein 1F
A_21_P0000504	3.63641	1.86251	up	-0.825445	-0.745532	-0.842127	1.46591	0.962994	0.745532	RNU6ATAC	Homo sapiens RNA, U6atac small nuclear (U12-dependent splicing) (RNU6ATAC), small nuclear RNA [NR_023344]	GACAACACGCATACGGTTAAGGCATTGCCACCTACTTCGTGGCATCTAACCATCGTTTTT		100151684	NR_023344	RNA, U6atac small nuclear (U12-dependent splicing)
A_33_P3221293	4.08037	2.0287	up	-0.913844	-0.735397	-0.833439	1.65907	1.20896	0.735397	DFNA5	Homo sapiens deafness, autosomal dominant 5 (DFNA5), transcript variant 1, mRNA [NM_004403]	TCTGTGCTTTAGGCAGAGAACATTCATGATGTCATATGTGAACTAGAAGTACGTGTTACT	ENST00000409775	1687	NM_004403	deafness, autosomal dominant 5
A_21_P0005169	9.10025	3.18591	up	-1.33206	-1.4355	-1.59608	1.33206	1.57045	2.29156	lnc-CRISP2-1	LNCipedia lincRNA (lnc-CRISP2-1), lincRNA [lnc-CRISP2-1:1]	AATGAGACAGTATCAACTTGATGCTGCTCCTGCTTAGTGTACAGTGATCAGAAGCGTGTG				lnc-CRISP2-1:1
A_23_P416305	3.59377	1.8455	up	-0.845541	-0.650357	-0.718362	1.50497	1.16691	0.650357	RPL27A	Homo sapiens ribosomal protein L27a (RPL27A), mRNA [NM_000990]	TGCTGAAAAGTAATATTTTCTCTTTCGAGAGTTTTCATGGCCTTTTAAATTACACCCCCA	ENST00000314138	6157	NM_000990	ribosomal protein L27a
A_21_P0011220	5.99043	2.58266	up	-1.00308	-1.04231	-1.07519	1.76023	1.86409	1.00308	LINC00463	Homo sapiens long intergenic non-protein coding RNA 463 (LINC00463), long non-coding RNA [NR_120428]	TGGATGGGGATTGGGATTTATTGGCCTAATGCAAAGAGCATATAAAAAATGAGTAGGGAA	ENST00000413501	101928922		long intergenic non-protein coding RNA 463
A_23_P86653	4.15684	2.05549	up	-0.764666	-0.809688	-0.806457	1.56793	1.45305	0.764666	SRGN	Homo sapiens serglycin (SRGN), transcript variant 1, mRNA [NM_002727]	AGGACTTGGGTCAACATGGATTAGAAGAGGATTTTATGTTATAAAAGAGGATTTTCCCAC	ENST00000462445	5552	NM_002727	serglycin
A_33_P3411805	3.80051	1.92619	up	-0.863262	-0.783137	-1.016	0.783137	1.39066	0.942378		long intergenic non-protein coding RNA 388 [Source:HGNC Symbol;Acc:HGNC:42716] [ENST00000412714]	TTTGTACTGCACCCAATGACAGGAACCAGTGCCCTGACTGTGACTTGCTTCCCCCCTCAG	ENST00000412714
A_23_P150768	56.2857	5.8147	up	-2.42388	-3.16155	-3.40165	3.17362	2.85952	2.42388	SLCO2B1	Homo sapiens solute carrier organic anion transporter family, member 2B1 (SLCO2B1), transcript variant 1, mRNA [NM_007256]	TGCTGGTTGGTATCTGTAAATGTTTAATAAATATCTGAGCATGTATCTATCAACGCCAAG	ENST00000341411	11309	NM_007256	solute carrier organic anion transporter family, member 2B1
A_23_P48217	3.0022	1.58602	up	-0.74459	-0.647724	-0.669098	1.09597	0.952956	0.647724	APOLD1	Homo sapiens apolipoprotein L domain containing 1 (APOLD1), transcript variant 2, mRNA [NM_030817]	GAGTGGTTGTAGAAGTCTCCCTAAATCAGACATGTCAAGCAATCAGCCAACGTGGTGTAT	ENST00000326765	81575	NM_030817	apolipoprotein L domain containing 1
A_21_P0012159	5.07416	2.34317	up	-1.03732	-0.920903	-1.37475	1.19841	1.57722	0.920903	LINC00658	Homo sapiens long intergenic non-protein coding RNA 658 (LINC00658), transcript variant 1, long non-coding RNA [NR_038239]	TTTGGCTCTTTTTACCTTCAACAAGGTGTGCCACCTCTTTGATCCAGCAAGTGGGAAGAA	ENST00000422352	100507629	NR_038239	long intergenic non-protein coding RNA 658
A_23_P145238	3.70216	1.88837	up	-0.726118	-0.703381	-0.716073	1.3799	1.43625	0.703381	HIST1H2BK	Homo sapiens histone cluster 1, H2bk (HIST1H2BK), mRNA [NM_080593]	GGTCCATTCCTTCTCTCTAATAATCATTTACTGTTCCTCAAAGAATTGTCTACATTACCC		85236	NM_080593	histone cluster 1, H2bk
A_33_P3271711	4.07549	2.02697	up	-0.822453	-1.12936	-1.01448	1.18092	1.11125	0.822453			TCCTGTTTCCTGAATGCCATCTCACCAGGCACACGAAAGAATAAAATTAAGGAATCAAGA
A_23_P23815	33.1383	5.05043	up	-2.21152	-2.48275	-2.50298	3.01919	2.72333	2.21152	SLC30A1	Homo sapiens solute carrier family 30 (zinc transporter), member 1 (SLC30A1), mRNA [NM_021194]	ACAAGCCCCTTCTGGAAAGGATGCAGAAAAGACCCCAGCAGTTAGCATTTCTTGTTTAGA	ENST00000367001	7779	NM_021194	solute carrier family 30 (zinc transporter), member 1
A_23_P161769	4.624	2.20914	up	-0.9808	-1.04521	-1.4775	0.9808	1.1018		FXYD2	Homo sapiens FXYD domain containing ion transport regulator 2 (FXYD2), transcript variant b, mRNA [NM_021603]	CTTTAGACCTTTGTCCCCGTCACTGCCAGCGCTTGGGCTGAAGGAAGCTCCAGACTCAAT	ENST00000532984	486	NM_021603	FXYD domain containing ion transport regulator 2
A_23_P52266	7.65498	2.9364	up	-0.905826	-1.48987	-1.9588	1.84148	1.7074	0.905826	IFIT1	Homo sapiens interferon-induced protein with tetratricopeptide repeats 1 (IFIT1), transcript variant 1, mRNA [NM_001548]	ACTTTGAGAACTCTGTGAGACAAGGTCCTTAGGCACCCAGATATCAGCCACTTTCACATT	ENST00000371804	3434	NM_001548	interferon-induced protein with tetratricopeptide repeats 1
A_21_P0014724	15.6333	3.96655	up	-1.56457	-1.86325	-1.96728	2.5339	2.40609	1.56457	LOC100507336	PREDICTED: Homo sapiens uncharacterized LOC100507336 (LOC100507336), transcript variant X1, ncRNA [XR_251947]	GCTCTCTTTGGCTTTTCTTGCACAATTTTAAATTGACCAGGTCTACTTGCAAAAATAAAG		100507336	XR_251947	uncharacterized LOC100507336
A_23_P206724	41.6805	5.3813	up	-2.40877	-2.51341	-2.62732	2.40877	2.58405	3.60159	MT1E	Homo sapiens metallothionein 1E (MT1E), mRNA [NM_175617]	GGCATCGGAGAAGTGCAGCTGCTGTGCCTGATGTGGGAACAGCTCTTCTCCCAGATGTAA	ENST00000306061	4493	NM_175617	metallothionein 1E
A_21_P0014172	3.02588	1.59735	up	-0.680293	-0.896579	-0.603578	1.03198	0.976051	0.603578	HIST1H4H	Homo sapiens histone cluster 1, H4h, mRNA (cDNA clone IMAGE:4273904). [BC010926]	TTGCCTAGTTCTGTCCCACAGATTTCCAATAAAAGGTGAATAAAATCAGGTCACTCTTCT		8365	BC010926	histone cluster 1, H4h
A_21_P0000361	6.33099	2.66243	up	-1.27482	-1.06856	-1.6878	1.58806	1.29948	1.06856	SNORA79	Homo sapiens small nucleolar RNA, H/ACA box 79 (SNORA79), small nucleolar RNA [NR_003021]	CTCAGAGAATATTAGGATAATGGAGTTATCTGTTCTCTGAAATTTGCGGAATCAAACATG		677845	NR_003021	small nucleolar RNA, H/ACA box 79
A_23_P138655	4.8936	2.2909	up	-1.49371	-0.715898	-1.60796	1.05165	1.28756	0.715898	CYP26A1	Homo sapiens cytochrome P450, family 26, subfamily A, polypeptide 1 (CYP26A1), transcript variant 2, mRNA [NM_057157]	TGTGGACAATCTCCCTGCAAGATTCACCCATTTCCATGGGGAAATCTGATGAGCTTGAAT	ENST00000623162	1592	NM_057157	cytochrome P450, family 26, subfamily A, polypeptide 1
A_21_P0004636	3.58394	1.84155	up	-0.758054	-1.15226	-0.802203	0.801264	1.25281	0.758054	LOC101928406	PREDICTED: Homo sapiens uncharacterized LOC101928406 (LOC101928406), ncRNA [XR_241981]	TTAATTGGTTCAGTTTTCTTCCATTTCTCCTGAGCTCACCCTGACCCTATGCACTGCTGA	ENST00000451285	101928406	XR_241981	uncharacterized LOC101928406
A_23_P206661	22.5241	4.4934	up	-2.27516	-1.80258	-3.16265	2.54564	1.80258	1.89159	NQO1	Homo sapiens NAD(P)H dehydrogenase, quinone 1 (NQO1), transcript variant 1, mRNA [NM_000903]	GTTTATATACAGTACACAGATACCTTGAAAGGAAGAGCTAATAAATCTCTTCTTTGCTGC	ENST00000320623	1728	NM_000903	NAD(P)H dehydrogenase, quinone 1
A_23_P26325	9.66764	3.27316	up	-1.41038	-1.5956	-1.50704	2.06519	1.8309	1.41038	CCL17	Homo sapiens chemokine (C-C motif) ligand 17 (CCL17), mRNA [NM_002987]	AAGAAGAGCCACAGTGAGGGAGATCCCATCCCCTTGTCTGAACTGGAGCCATGGGCACAA	ENST00000219244	6361	NM_002987	chemokine (C-C motif) ligand 17
A_33_P3382498	6.32773	2.66169	up	-2.21326	-1.90236	-0.918191	0.918191	1.10869	0.924375	SIGLEC14	Homo sapiens sialic acid binding Ig-like lectin 14 (SIGLEC14), mRNA [NM_001098612]	GAGAGGCAGCATTTGTTTTCCAGTTAAAACTCTACCTCATTGTGATTATTATCCAATACA	ENST00000360844	100049587	NM_001098612	sialic acid binding Ig-like lectin 14
A_21_P0013947	3.23646	1.69442	up	-0.790643	-0.5869	-1.03859	0.5869	0.7972	1.28301	CGB7	chorionic gonadotropin, beta polypeptide 7 [Source:HGNC Symbol;Acc:HGNC:16451] [ENST00000598442]	AAAGCTCAGACACCGCAGCTGAACCCTCCTACTGACCACAAAGTACCAGAGCAGCGAGAC	ENST00000598442	94027	XM_005259426	chorionic gonadotropin, beta polypeptide 7
A_33_P3236868	65.5083	6.0336	up	-3.21344	-2.83581	-2.96809	2.83581	2.98422	3.26344	MT1X	Homo sapiens metallothionein 1X (MT1X), mRNA [NM_005952]	TGCCAGGACAGCTGTGCTCTCAGATGTAAATAGAGCAACCTATATAAACCTGGATTTTTT	ENST00000568370	4501	NM_005952	metallothionein 1X
A_21_P0004566	8.48358	3.08467	up	-1.46985	-1.41995	-1.09004	2.24402	1.94014	1.09004	lnc-ARRDC3-1	LNCipedia lincRNA (lnc-ARRDC3-1), lincRNA [lnc-ARRDC3-1:6]	CCAACAATATTTGAAACCCTTATCTGCGTGTACAAGTTTGCTACTGGTTTTGTTTTGCTC				lnc-ARRDC3-1:6
A_33_P3224710	5.87174	2.55379	up	-0.975008	-1.00513	-1.11373	2.02034	1.57214	0.975008	TFEC	Homo sapiens transcription factor EC (TFEC), transcript variant 1, mRNA [NM_012252]	GGTCATTGCCTTTCTCCATTGTCTAGTAGACATGTCTAAAGTTCAAACTTTATAGGATAA	ENST00000393485	22797	NM_012252	transcription factor EC
A_21_P0004422	15.7901	3.98094	up	-3.06808	-1.97398	-1.47508	2.14816	1.80245	1.47508	lnc-ARRDC3-1	LNCipedia lincRNA (lnc-ARRDC3-1), lincRNA [lnc-ARRDC3-1:10]	GCCTGAAAAGGCAGATACATAGGTGACACCCACAAATAGGAAGAAAATCAACCTGAACCT				lnc-ARRDC3-1:10
A_23_P150362	4.53763	2.18194	up	-0.952	-0.835179	-1.19033	1.30932	0.835179	1.42381	TEX12	Homo sapiens testis expressed 12 (TEX12), mRNA [NM_031275]	ATCTAATGTTGTCTACCTATGCAAAGCTTTTAAGTGAGAGAGCAGCAGTAGATGCATCTT	ENST00000530752	56158	NM_031275	testis expressed 12
A_21_P0014664	8.4501	3.07897	up	-1.16192	-1.5999	-1.49048	1.16192	1.35197	2.47072	LOC102723630	PREDICTED: Homo sapiens uncharacterized LOC102723630 (LOC102723630), transcript variant X2, ncRNA [XR_424068]	AATCCCGGCTCCTGCTGCAATAAGAGGCTGTTCTGGAAGCTCTGGGGTTCGGGTCTTTGT		102723630	XR_424068	uncharacterized LOC102723630
A_21_P0004420	8.45732	3.0802	up	-1.25366	-1.13312	-1.48986	2.27921	1.95163	1.13312	lnc-ARRDC3-1	LNCipedia lincRNA (lnc-ARRDC3-1), lincRNA [lnc-ARRDC3-1:14]	CCGCTGGAACTGACAGCATTGTGATTTTCTTTTACTGTTAGTTTTAAATTACTAGAACCA				lnc-ARRDC3-1:14
A_21_P0000378	4.14369	2.05092	up	-1.03891	-0.771529	-1.07368	0.908449	1.58865	0.771529	SNORD66	Homo sapiens small nucleolar RNA, C/D box 66 (SNORD66), small nucleolar RNA [NR_003055]	CTGTTAGTGCCACGTGTCTGGGCCACTGAGACACCATGATGGAACTGAGGATCTGAGGAA		692107	NR_003055	small nucleolar RNA, C/D box 66
A_32_P134968	4.52979	2.17944	up	-0.828262	-0.972208	-0.831818	0.828262	1.7513	1.32648	SPTB	Homo sapiens spectrin, beta, erythrocytic (SPTB), transcript variant 1, mRNA [NM_001024858]	ACCTGCTCAACCGTGCTTCCACCAACCAGAGGAAACCCATTTACTAGTTTTTCTAATAAA	ENST00000389722	6710	NM_001024858	spectrin, beta, erythrocytic
A_33_P3775848	5.3651	2.4236	up	-0.986013	-1.04313	-0.9803	1.83221	1.44886	0.9803	CLIC2	Homo sapiens chloride intracellular channel 2 (CLIC2), mRNA [NM_001289]	CACCTCATGGTCAGAGATGAGAATGTAGCCTTTGTGACCAGATTATATTATTTTTAAATG	ENST00000369449	1193	NM_001289	chloride intracellular channel 2
A_19_P00809119	3.1983	1.67731	up	-0.619554	-0.560793	-0.847521	1.28776	0.560793	1.1555	CASC15	Homo sapiens cancer susceptibility candidate 15 (non-protein coding) (CASC15), long non-coding RNA [NR_015410]	CAGATAGCTGAAGAGAGAGAGAGAGAAGAGAGAACGGCTTACAGCTCAGGTCCTCTCTCC	ENST00000444265	401237	NR_015410	cancer susceptibility candidate 15 (non-protein coding)
A_21_P0000383	3.21643	1.68546	up	-0.86819	-0.597915	-0.647079	1.28721	1.05807	0.597915	SNORD84	Homo sapiens small nucleolar RNA, C/D box 84 (SNORD84), small nucleolar RNA [NR_003065]	TATGATGTTTTCTTTTCGAAAGGTGAGCGCTTTGCGCAGTGATGACCCTCATCTATCACC	ENST00000467175	692199	NR_003065	small nucleolar RNA, C/D box 84
A_21_P0002856	3.9741	1.99063	up	-1.61715	-0.713861	-1.21765	0.713861	0.954767	0.754585			TAGGTCATTGAATGCTCCCTTCCAGGAATCTTAATTTAAACCAAGGATTGAGTAGAATGA	ENST00000497258
A_21_P0005206	7.84511	2.97179	up	-1.28219	-1.57478	-1.67083	1.33334	1.77205	1.28219		BX107688 Soares_NFL_T_GBC_S1 Homo sapiens cDNA clone IMAGp998J234013, mRNA sequence [BX107688]	AGGGAAGAGAAAGGCTCCAACCTTGACCCTGTCAAATAAATATCTCTAACTTTTTCTGTC	ENST00000453798
A_33_P3338121	4.57079	2.19244	up	-0.928899	-1.19783	-1.39628	1.0988	0.928899	1.02661	LAMB3	Homo sapiens laminin, beta 3 (LAMB3), transcript variant 2, mRNA [NM_001017402]	ACAAAGATGGTGGAGATTGGCATGCCATTGAAACTAAGAGCTCTCAAGTCAAGGAAGCTG	ENST00000367030	3914	NM_001017402	laminin, beta 3
A_21_P0003172	5.18591	2.3746	up	-0.983273	-0.873261	-0.941434	0.873261	1.76288	1.68969	LOC102723759	PREDICTED: Homo sapiens uncharacterized LOC102723759 (LOC102723759), ncRNA [XR_425634]	CTTTATACACACAAACTGTATTCTCTCCCACTGTTTTGTCTTCTTTCATAAAGCAGGAAA		102723759	XR_425634	uncharacterized LOC102723759
A_21_P0013628	3.12681	1.64469	up	-0.981418	-0.548135	-1.28794	0.758178	0.548135	0.810271	XLOC_l2_015160	BROAD Institute lincRNA (XLOC_l2_015160), lincRNA [TCONS_l2_00029272]	AATCTTGTCCTTCTTTCCCCGCTTTTTGTGAACACAGAAATGTAACTGCTTGCAGAAATA
A_32_P69368	3.35153	1.74482	up	-0.599844	-0.83948	-0.870306	1.42303	0.901953	0.599844	ID2	Homo sapiens inhibitor of DNA binding 2, dominant negative helix-loop-helix protein (ID2), mRNA [NM_002166]	GTGAAACCTTGTTAACTCTTTAATTAGAGTTTTCTTGTATAGTGGCAGAGATGTCTATTT	ENST00000396290	3398	NM_002166	inhibitor of DNA binding 2, dominant negative helix-loop-helix protein
A_21_P0000331	3.65403	1.86949	up	-0.931387	-0.784864	-0.842978	1.26044	1.00393	0.784864	SNORA44	Homo sapiens small nucleolar RNA, H/ACA box 44 (SNORA44), small nucleolar RNA [NR_002976]	GACTTTGACAGCGCAGGTCAGTACAATACCTGCAAGCTGCCACTCAGCTTTCCTATAATG		677825	NR_002976	small nucleolar RNA, H/ACA box 44
A_23_P379692	3.09217	1.62862	up	-0.681558	-0.645984	-0.864956	1.23168	0.815698	0.645984	C14orf178	Homo sapiens chromosome 14 open reading frame 178 (C14orf178), transcript variant 1, mRNA [NM_174943]	GATCTTAACCATACTGTCTTCCAAGTGAAAGATTCTACCTTTCTAAGACATCTGGAGTCA	ENST00000556047	283579	NM_174943	chromosome 14 open reading frame 178
A_21_P0000671	4.4538	2.15504	up	-1.12761	-0.846067	-0.760942	1.34404	1.62551	0.760942	MT1E	Homo sapiens metallothionein 1E (MT1E), mRNA [NM_175617]	ATGTGGGAACAGCTCTTCTCCCAGATGTTAATAGAACAACCTGCACAACCTGGATTTTTT	ENST00000563395	4493	NM_175617	metallothionein 1E
A_33_P3424057	47.7955	5.5788	up	-3.00316	-2.52865	-2.07267	2.73524	2.07267	4.32401	PEG3	Homo sapiens paternally expressed 3 (PEG3), transcript variant 1, mRNA [NM_006210]	TAAACATAAGGAGCTTCATCTGGAAGAAGAAGAAGAAGATGAAGCAGCAGCAGCTGCAGC	ENST00000599534	5178	NM_006210	paternally expressed 3
A_23_P395464	3.8502	1.94493	up	-1.06165	-0.998343	-0.680554	1.51389	0.899804	0.680555	ZNF582	Homo sapiens zinc finger protein 582 (ZNF582), mRNA [NM_144690]	AATCTGAAAGATAAACTCATATGCACTAAACATGCTATTCAAGTCTACCAAACATCCAGG	ENST00000619584	147948	NM_144690	zinc finger protein 582
A_21_P0000513	4.09246	2.03297	up	-0.888858	-0.817079	-1.43931	0.954403	1.18217	0.817079	VTRNA1-1	Homo sapiens vault RNA 1-1 (VTRNA1-1), vault RNA [NR_026703]	AGCGGTTACTTCGACAGTTCTTTAATTGAAACAAGCAACCTGTCTGGGTTGTTCGAGACC		56664	NR_026703	vault RNA 1-1
A_32_P108156	5.43599	2.44254	up	-0.962758	-1.08083	-1.00083	1.83354	1.48691	0.962758	MIR155HG	Homo sapiens MIR155 host gene (non-protein coding) (MIR155HG), long non-coding RNA [NR_001458]	TTAACAGTGTATGATGCCTGTTACTAGCATTCACATGGAACAAATTGCTGCCGTGGGAGG	ENST00000456917	114614	NR_001458	MIR155 host gene (non-protein coding)
A_21_P0014497	11.2761	3.4952	up	-1.77819	-1.64338	-1.88066	1.64534	1.64338	1.89464	LOC101928612	PREDICTED: Homo sapiens uncharacterized LOC101928612 (LOC101928612), transcript variant X1, ncRNA [XR_245345]	CGGAAGATGTCAGAGCGTTTCCCTAGCAATGTTTTAGAAGTTACTTCTGTCTGGAAAAAA		101928612	XR_245345	uncharacterized LOC101928612
A_33_P3286916	5.38495	2.42893	up	-1.12377	-0.966872	-1.19911	0.966873	1.61363	1.41654	PDZD7	Homo sapiens PDZ domain containing 7 (PDZD7), transcript variant 1, mRNA [NM_001195263]	TCTAGAGCAGGTGACCCACCAGCGTGCAGTAGACACCATCCGTCGGGCTTATCGAAACAA	ENST00000619208	79955	NM_001195263	PDZ domain containing 7
A_23_P431505	-5.61246	-2.48863	down	0.836891	1.25783	1.3143	-0.836891	-1.58458	-1.6354	lnc-AF131215.2.1-1	Homo sapiens primary neuroblastoma cDNA, clone:Nbla00437, full insert sequence. [AB073660]	TTACAGCGTAACATGTGTACTTCAAATTGTAGTAGTGACTGGAAATTTAGGATTCTGTTG		AB073660	lnc-AF131215.2.1-1:1	chr8:10965890-10965831
A_32_P85591	-4.64919	-2.21698	down	0.771486	1.07194	1.0978	-1.48208	-1.45615	-0.771486	XLOC_l2_015786	BROAD Institute lincRNA (XLOC_l2_015786), lincRNA [TCONS_l2_00030570]	GGCAAGAGAGAAAGTGAATACGCTGATATAAGAAGCAAGAAACCTTCCTTCCTTCCAGAT				chrX:103231321-103295675
A_33_P3330911	-3.88811	-1.95907	down	0.910285	0.762929	0.679466	-0.679466	-1.20275	-1.64231	BCAS1	Homo sapiens breast carcinoma amplified sequence 1 (BCAS1), mRNA [NM_003657]	AAATGATTTGGGAAAACAATTGCTTTTGAGGCTCAGTGACAACGGCAAAGATTACAACTT	8537	NM_003657	breast carcinoma amplified sequence 1	chr20:52560576-52560517
A_23_P323801	-38.5213	-5.26759	down	2.28697	2.14788	2.49429	-3.45399	-3.27175	-2.14788	BEST3	Homo sapiens bestrophin 3 (BEST3), transcript variant 1, mRNA [NM_032735]	GTTTAACTTGAACTCTTATGCAAAAATCCTAATCGTGTCGCAACACGGGACCAGTTACTG	144453	NM_032735	bestrophin 3	chr12:70047683-70047624
A_23_P121545	-4.69468	-2.23103	down	0.937896	0.868156	0.971006	-0.868156	-1.12162	-1.92624	GPM6A	Homo sapiens glycoprotein M6A (GPM6A), transcript variant 2, mRNA [NM_201591]	AAGTTCTTGTAGTAGGTAGGGGGTACTACTAGGGATATCTGTGGCATGATTATGCATTCC	2823	NM_201591	glycoprotein M6A	chr4:176554554-176554495
A_33_P3313660	-3.62476	-1.85788	down	0.928459	1.16006	0.719836	-1.15354	-0.891919	-0.719836	BRD7P3	Homo sapiens bromodomain containing 7 pseudogene 3 (BRD7P3), non-coding RNA [NR_002730]	GAAAAAACAGCCCTTTCAACAAATGGTGCTGAACAATTGGACATCCACATGCAAAGAAAA	23629	NR_002730	bromodomain containing 7 pseudogene 3	chr6:118824846-118824905
A_21_P0014003	-4.73077	-2.24207	down	1.18223	0.992811	0.925486	-1.03838	-0.925486	-1.66183	DST	dystonin [Source:HGNC Symbol;Acc:HGNC:1090] [ENST00000521821]	TCACTACCTGCTGGAGAGATGGAAAATTATTTAATGCCATCATTCATAAATACAGGTATG	667		dystonin	chr6:56535493-56535434
A_33_P3351175	-4.14276	-2.05059	down	1.04666	1.13813	0.747995	-0.747995	-0.901565	-1.56943	WNK2	Homo sapiens WNK lysine deficient protein kinase 2 (WNK2), transcript variant 2, mRNA [NM_006648]	CCAGTTCACGCTGTTTTGTAACCACTTTCTAAGCATTTTTTATTCACAATTGGAAACACA	65268	NM_006648	WNK lysine deficient protein kinase 2	chr9:96082754-96082813
A_33_P3216098	-8.12754	-3.02282	down	1.76107	1.27188	1.16661	-1.72594	-1.16661	-1.97635	DGCR9	Homo sapiens DiGeorge syndrome critical region gene 9 (non-protein coding) (DGCR9), long non-coding RNA [NR_024159]	CAAGTGTCCTGTCTTTTGCAAAAATGTCAAACGTAGCTACTCAGTCTCTTTTTTGTTTTT	25787	NR_024159	DiGeorge syndrome critical region gene 9 (non-protein coding)	chr22:19007644-19007703
A_23_P205575	-3.14967	-1.6552	down	1.0602	0.620072	0.762846	-0.620072	-0.672692	-1.22972	GPR135	Homo sapiens G protein-coupled receptor 135 (GPR135), mRNA [NM_022571]	AGACGGGGGAGGCTTACCACTTTCCCCAAACAACATAAAAGACAATGTCCCTTCTTCAAA	64582	NM_022571	G protein-coupled receptor 135	chr14:59930349-59930290
A_24_P272451	-6.36975	-2.67124	down	1.356	1.56886	1.09692	-1.09692	-1.18396	-1.71106	SCIMP	SLP adaptor and CSK interacting membrane protein [Source:HGNC Symbol;Acc:HGNC:33504] [ENST00000571800]	TATAAGGGTGTAAATTCATGTTCAAATCCCAGCTTGGAACATAAACAGAAAGAAACATGG	388325	XM_005256631	SLP adaptor and CSK interacting membrane protein	chr17:5116499-5116440
A_23_P323685	-5.17657	-2.372	down	0.969955	1.03464	1.24846	-1.2765	-0.969955	-1.61648	HIST1H4H	Homo sapiens histone cluster 1, H4h (HIST1H4H), mRNA [NM_003543]	GTTCTGAAGGTGTTCCTGGAGAACGTGATTCGTGACGCTGTCACTTACACAGAGCACGCC	8365	NM_003543	histone cluster 1, H4h	chr6:26285556-26285497
A_33_P3220437	-3.03581	-1.60208	down	1.08511	0.875792	0.649292	-0.769818	-0.776942	-0.649292	TNFAIP8L1	Homo sapiens tumor necrosis factor, alpha-induced protein 8-like 1 (TNFAIP8L1), transcript variant 1, mRNA [NM_001167942]	TAATCCCAGCTACTTGAGAGATGACGAGGGAAGATCACTTGAGCCCAGGAGTTAAGAGGC	126282	NM_001167942	tumor necrosis factor, alpha-induced protein 8-like 1	chr19:4653833-4653892
A_23_P320225	-3.09062	-1.6279	down	1.25733	0.756628	0.550836	-0.550836	-0.876389	-0.891667	EVC2	Homo sapiens Ellis van Creveld syndrome 2 (EVC2), transcript variant 1, mRNA [NM_147127]	CCCTGTACCCATTGTAGGGGCAGAAACCATTGATCTATTAAACACAGGAGAGAAGCTCTT	132884	NM_147127	Ellis van Creveld syndrome 2	chr4:5564743-5564684
A_21_P0013977	-5.16157	-2.36781	down	1.40184	0.917107	1.17099	-1.03328	-0.917107	-1.66311	PCID2	PCI domain containing 2 [Source:HGNC Symbol;Acc:HGNC:25653] [ENST00000493650]	CCGTGTTTCCTAAATGAATACTTGACATTTCGCTTGATCGTATATTTTTGCACAGCAGTG	55795	BC008975	PCI domain containing 2	chr13:113842299-113842240
A_23_P250413	-3.75715	-1.90964	down	0.83779	0.897213	0.972774	-0.83779	-0.901022	-1.28233	PARVG	Homo sapiens parvin, gamma (PARVG), transcript variant 1, mRNA [NM_022141]	TTGCTGATTGGACAACTTGAAGGCTTCTTCCTGCACTTAAAGGAATTCTACCTCACTCCC	64098	NM_022141	parvin, gamma	chr22:44594525-44594584
A_23_P404045	-3.88425	-1.95764	down	1.28459	0.821801	0.820537	-0.94109	-0.820537	-1.18435	MTHFR	Homo sapiens methylenetetrahydrofolate reductase (NAD(P)H) (MTHFR), mRNA [NM_005957]	GAAGCAAGTGTCTTTGAAGTCTTTGTTCTTTACCTCTCGGGAGAACCAAACCGGAATGGT	4524	NM_005957	methylenetetrahydrofolate reductase (NAD(P)H)	chr1:11854475-11854421
A_24_P9321	-3.45341	-1.78802	down	0.766729	0.779839	0.879906	-1.08096	-0.766729	-1.0899	HIST1H3I	Homo sapiens histone cluster 1, H3i (HIST1H3I), mRNA [NM_003533]	GAGCTGCTAATCCGGAAGCTACCTTTTCAGCGCTTGGTACGGGAGATCGCACAGGACTTT	8354	NM_003533	histone cluster 1, H3i	chr6:27839916-27839857
A_33_P3235876	-3.12102	-1.64202	down	0.610307	0.881228	0.5741	-1.03416	-1.25216	-0.5741		immunoglobulin heavy variable 3-66 [Source:HGNC Symbol;Acc:HGNC:5619] [ENST00000390632]	ATCTCCAGAGACAATTCCAAGAACACGCTGTATCTTCAAATGAACAGCCTGAGAGCTGAG		AF017464		chr14:107131119-107131060
A_33_P3220390	-3.09718	-1.63096	down	0.639125	0.720638	0.865963	-0.802886	-0.639125	-1.22513	WTAP	Homo sapiens Wilms tumor 1 associated protein, mRNA (cDNA clone IMAGE:5399821), partial cds. [BC028180]	GTTGTTTGATCCCAAAGGATTAGCTTAACATTATCAAGGACTAGCATAACTGTGATTATG	9589	BC028180	Wilms tumor 1 associated protein	chr6:160149383-160149442
A_24_P312325	-6.68453	-2.74083	down	1.29063	1.20908	1.28499	-1.33702	-1.20908	-1.89167	lnc-AF131215.3.1-1	Homo sapiens mRNA for hypothetical protein (C8ORF15). [AJ312027]	CTTGTTCAATGTGACTACTTTAGTTGCCTGTCCAATATGAAGTAGAAAAGCAGATTTCTG		AJ312027	lnc-AF131215.3.1-1:1	chr8:10980986-10980927
A_33_P3372207	-3.93414	-1.97605	down	1.10046	0.799659	0.673064	-1.40582	-1.27607	-0.673064			TTCAATAACTCTTGGAAGAAAATGAGCTCAATCCATCTTTTTCCAGGTTTCCTTCACTGA				chr1:182151875-182151816
A_33_P3298617	-7.24716	-2.85742	down	0.638014	0.00144172	-0.00144172	-2.68967	-2.59981		XLOC_l2_006578	BROAD Institute lincRNA (XLOC_l2_006578), lincRNA [TCONS_l2_00012276]	GGTCTCGTCTGTGCGCACTCAGGTACCGACGACCTCCGCCAAGCCGGGCCCCCAGTCTAA				chr19:7982723-7982782
A_23_P57709	-14.4862	-3.85661	down	2.43407	1.98306	1.36508	-1.36508	-2.70311	-1.71942	PCOLCE2	Homo sapiens procollagen C-endopeptidase enhancer 2 (PCOLCE2), mRNA [NM_013363]	TATCTGATTGGAAACCTGCCGACTTAGTGCGGTGATAGGAAGCTAAAAGTGTCAAGCGTT	26577	NM_013363	procollagen C-endopeptidase enhancer 2	chr3:142536972-142536913
A_23_P77493	-3.94492	-1.97999	down	0.765406	1.06288	0.873665	-0.765406	-0.963639	-1.50899	TUBB3	Homo sapiens tubulin, beta 3 class III (TUBB3), transcript variant 1, mRNA [NM_006086]	TTGTTTTTTACTGGTTTGTGTTTATATTTTCGGGGATACTTAATAAATCTATTGCTGTCA	10381	NM_006086	tubulin, beta 3 class III	chr16:90002437-90002496
A_33_P3246598	-3.25316	-1.70184	down	0.816704	0.645916	0.73549	-0.943924	-0.645916	-1.31757	NUGGC	Homo sapiens nuclear GTPase, germinal center associated (NUGGC), mRNA [NM_001010906]	TTTAGGGCAAGAAACTTTTGCTTCCGCAAAAACATCTAAACATCGCTGGGCATGGTGGCT	389643	NM_001010906	nuclear GTPase, germinal center associated	chr8:27880017-27879958
A_24_P219474	-7.93001	-2.98732	down	1.04049	2.28402	1.49632	-1.30403	-1.04049	-1.79663	MGAT5B	Homo sapiens mannosyl (alpha-1,6-)-glycoprotein beta-1,6-N-acetyl-glucosaminyltransferase, isozyme B (MGAT5B), transcript variant 1, mRNA [NM_144677]	AAATCTCATTGGTTCTCAAGGACTAACCTGTGGGGGAAAGCAATAGAGACACTCTTTTTC	146664	NM_144677	mannosyl (alpha-1,6-)-glycoprotein beta-1,6-N-acetyl-glucosaminyltransferase, isozyme B	chr17:74946345-74946404
A_33_P3351851	-3.59102	-1.84439	down	0.796945	0.779804	0.773869	-1.19406	-0.773869	-1.21463	HIST1H4L	Homo sapiens histone cluster 1, H4l (HIST1H4L), mRNA [NM_003546]	TTAAAGTGTTTTTGGAGAATGTAATCCGCGATGCAGTTACCTACACGGAGCACGCCAAAC	8368	NM_003546	histone cluster 1, H4l	chr6:27841113-27841054
A_19_P00321809	-3.43414	-1.77995	down	0.948895	0.715511	0.777918	-0.715511	-0.752535	-1.42948	LOC401320	Homo sapiens uncharacterized LOC401320 (LOC401320), long non-coding RNA [NR_038889]	ACTCAAAGTGAAGATCAAAAGAACCAAATGACAGCAATAGCCAAGTGTAATCATCAGTAA	401320	NR_038889	uncharacterized LOC401320	chr7:30590330-30590271
A_33_P3369393	-3.89965	-1.96334	down	0.916773	0.927033	0.950339	-0.916773	-1.0217	-1.15742	NCF1	Homo sapiens neutrophil cytosolic factor 1 (NCF1), mRNA [NM_000265]	GCCGAGCGCCGACCTCATCCTGAACCGCTGCAGCGAGAGCACCAAGCGGAAGCTGGCGTC	653361	NM_000265	neutrophil cytosolic factor 1	chr7:74203435-74203494
A_23_P369666	-3.46211	-1.79165	down	0.690107	0.741071	1.07012	-0.690107	-0.809015	-1.37454	ZMYND8	zinc finger, MYND-type containing 8 [Source:HGNC Symbol;Acc:HGNC:9397] [ENST00000468376]	AGTACAGTTGGATTAATCTTGCTATTTAAAAAGTTGGTGGGGCAAAGCCGAGTCTAGGAT	23613	AL137703	zinc finger, MYND-type containing 8	chr20:45866354-45866295
A_19_P00315601	-4.01665	-2.00599	down	0.822515	0.85301	0.802494	-1.16326	-0.802494	-1.5742	XLOC_l2_015760	BROAD Institute lincRNA (XLOC_l2_015760), lincRNA [TCONS_l2_00030536]	CCAATGCCTCCCAGAAACCCCATCATCTCAAAATCACTAGCTATTAAAAGAAGCAAAAAA				chrX:73498033-73497974
A_23_P53126	-7.85603	-2.9738	down	1.36502	1.36024	1.34495	-1.34495	-1.49813	-2.00811	LMO2	Homo sapiens LIM domain only 2 (rhombotin-like 1) (LMO2), transcript variant 1, mRNA [NM_005574]	GATGAATCACTGTTTTTAGACACCTTCATTTTGAGGGGAGGAGTTCCACAGATTGTTTCT	4005	NM_005574	LIM domain only 2 (rhombotin-like 1)	chr11:33880302-33880243
A_23_P152406	-3.2615	-1.70553	down	0.755809	0.802656	0.627599	-1.09417	-1.20877	-0.627599	CAPNS2	Homo sapiens calpain, small subunit 2 (CAPNS2), mRNA [NM_032330]	CTATCAAAGAGTGGCTGCAGTTGACCATGTATTCCTGAAGTGGGAACTGAGAAGTCAAGA	84290	NM_032330	calpain, small subunit 2	chr16:55601378-55601437
A_33_P3217258	-9.95397	-3.31527	down	1.53236	1.4329	1.25578	-1.77051	-1.25578	-2.6985	ASZ1	Homo sapiens ankyrin repeat, SAM and basic leucine zipper domain containing 1 (ASZ1), transcript variant 1, mRNA [NM_130768]	CGGATTCGGTTTTCTTCTTTTCATTTGCAAGCTAACTTTCCAGAGGAAATAATCCAAATA	136991	NM_130768	ankyrin repeat, SAM and basic leucine zipper domain containing 1	chr7:117003701-117003642
A_33_P3351290	-3.2721	-1.71022	down	0.760965	0.802492	0.816129	-0.93643	-0.760965	-1.05367	MZB1	marginal zone B and B1 cell-specific protein [Source:HGNC Symbol;Acc:HGNC:30125] [ENST00000509591]	GTGCTTCCTGCTCAAACGGCTCTCTTGCCACTTTATTTTCCCCAGAGACTCTGCTCCTAT	51237	AK057549	marginal zone B and B1 cell-specific protein	chr5:138724401-138724342
A_23_P106898	-3.19396	-1.67535	down	0.631103	0.97066	0.876655	-0.631103	-0.727249	-1.18927	ORAI3	Homo sapiens ORAI calcium release-activated calcium modulator 3 (ORAI3), mRNA [NM_152288]	GCCACCATTTCCATTCCTATACAGGATGTGAAGGTCAGAAGGCAGCCAATTGTTGGTTTA	93129	NM_152288	ORAI calcium release-activated calcium modulator 3	chr16:30965489-30965548
A_21_P0001825	-5.19416	-2.37689	down	0.991151	0.993688	0.916415	-0.916415	-1.24665	-2.06635	LOC100506457		AATTGTGATCAACCAGAATCCAGAACACGCTGTGCTTAATGGAGTGAACTGCCTGTGAAG	100506457		uncharacterized LOC100506457	chr2:12005977-12006036
A_23_P105368	-6.98746	-2.80477	down	1.15534	1.33605	1.41528	-1.15534	-1.36394	-1.98837		Homo sapiens cDNA FLJ10195 fis, clone HEMBA1004771. [AK001057]	TTACCCCTTATATCTGTACAGTTTTGTGAATTATGACAAACTTACTCAGGTTGTGTAACC		AK001057		chr12:129298442-129298383
A_23_P32054	-3.17706	-1.66769	down	0.962092	0.578074	0.848773	-0.880231	-0.578074	-1.15583	CAMSAP1	Homo sapiens calmodulin regulated spectrin-associated protein 1 (CAMSAP1), mRNA [NM_015447]	ATTAGTGTTGAAGCCGAATGTTATGGTTTTTATTGCGGAGCTTTTTTGGTGGTTCGAGAA	157922	NM_015447	calmodulin regulated spectrin-associated protein 1	chr9:138742180-138742033
A_21_P0000900	-4.04265	-2.0153	down	1.27478	0.767882	0.887837	-0.798243	-0.767882	-1.54928	STARD4-AS1	Homo sapiens STARD4 antisense RNA 1 (STARD4-AS1), long non-coding RNA [NR_040093]	GCTGATACTGCATTCCATTCATTCATTGTCTGAATTCAAGTTTGTGTTTTTCATGAAGGC	100505678	NR_040093	STARD4 antisense RNA 1	chr5:111075333-111075392
A_23_P165042	-5.64907	-2.49801	down	1.08596	0.835503	1.45883	-0.835503	-1.44158	-1.83666	LOC100129935	Homo sapiens lectin, galactoside-binding, soluble, 14 pseudogene (LOC100129935), non-coding RNA [NR_026870]	TGAGGGGAGATGCCACAATGTGTTCTTCAAGGACGGCAAACAATTTGATCTGAGCATCTT	100129935	NR_026870	lectin, galactoside-binding, soluble, 14 pseudogene	chr19:40131243-40131302
A_33_P3351264	-5.59628	-2.48447	down	1.06617	1.17045	1.2696	-1.06617	-1.16938	-1.71163	OVOL3	Homo sapiens ovo-like zinc finger 3 (OVOL3), mRNA [NM_001302757]	TGTTGTGGCAAGGGCTTTCATGACGCCTTCGATCTCAAGCGCCACATGAGGACTCACACT	728361		ovo-like zinc finger 3	chr19:36603806-36603865
A_23_P129209	-4.14137	-2.05011	down	0.935813	0.855458	0.874513	-0.855458	-1.12875	-1.50034	IDH2	Homo sapiens isocitrate dehydrogenase 2 (NADP+), mitochondrial (IDH2), transcript variant 1, mRNA [NM_002168]	GCGTTTCAAGGACATCTTCCAGGAGATCTTTGACAAGCACTATAAGACCGACTTCGACAA	3418	NM_002168	isocitrate dehydrogenase 2 (NADP+), mitochondrial	chr15:90630706-90630472
A_23_P93258	-3.53258	-1.82072	down	0.837017	0.731175	0.844751	-1.21889	-0.731174	-1.09916	HIST1H3B	Homo sapiens histone cluster 1, H3b (HIST1H3B), mRNA [NM_003537]	GGCTCTTTGAGGACACAAACCTTTGCGCCATCCATGCTAAGCGAGTGACTATTATGCCCA	8358	NM_003537	histone cluster 1, H3b	chr6:26031981-26031922
A_23_P363275	-4.02465	-2.00886	down	0.946656	0.947271	0.865421	-0.865421	-0.957225	-1.44459	WDR66	Homo sapiens WD repeat domain 66 (WDR66), transcript variant 1, mRNA [NM_144668]	CCAGGATGGTCAGTGAAGTTACCAGGAATGTTTAAAGCACAAAGGACTTTGGGTGTGTGT	144406	NM_144668	WD repeat domain 66	chr12:122441655-122441714
A_21_P0011393	-4.44271	-2.15144	down	1.17017	1.00129	0.803924	-0.803923	-1.03679	-1.63822	HERC2P9	hect domain and RLD 2 pseudogene 9 [Source:HGNC Symbol;Acc:HGNC:30495] [ENST00000507787]	AAAGTCGTGTAGGCTGTTAAGCAGTAGTTGATCATGGATACTTACACTGAAGTGTTATTG	440248		hect domain and RLD 2 pseudogene 9	chr15:28836210-28836269
A_33_P3383696	-4.83239	-2.27274	down	1.10662	1.2649	1.00713	-1.16828	-1.00713	-1.26415	SPEG	Homo sapiens SPEG complex locus (SPEG), transcript variant 1, mRNA [NM_005876]	CCCAGCCATCCAGCTGTCTGTCTGTCTGCCACAAGGAAATAAAAATGGCAAGCAGCATAA	10290	NM_005876	SPEG complex locus	chr2:220358295-220358354
A_33_P3285354	-3.00659	-1.58813	down	0.302492	0.0750353	-0.0750353	-1.44417	-1.53043		C11orf95	Homo sapiens chromosome 11 open reading frame 95 (C11orf95), mRNA [NM_001144936]	GAGGAAGAAGAGGAGGAGGAGGAGGGGGCCGGTGTCCCAGCTTGCCCGCCCAAGGGCCCA	65998	NM_001144936	chromosome 11 open reading frame 95	chr11:63533339-63533280
A_23_P501538	-3.97193	-1.98984	down	0.824646	0.981624	1.21095	-0.824646	-0.853042	-1.27461	HOXA3	Homo sapiens homeobox A3 (HOXA3), transcript variant 2, mRNA [NM_153631]	TAATTCCTTTAAACGGTAACGATGCAATAAAACCAGAGAAGATCCAGCTTTTGAAAACAG	3200	NM_153631	homeobox A3	chr7:27146830-27146771
A_23_P76136	-21.9731	-4.45767	down	2.16965	1.9649	2.02983	-1.9649	-2.65805	-2.58566	TSPAN11	Homo sapiens tetraspanin 11 (TSPAN11), mRNA [NM_001080509]	AGAGGTCTTAACCTAATGCGCATAGAGAAATTGTTCTCATTGTAAACATACCCCTGTCCT	441631	NM_001080509	tetraspanin 11	chr12:31149400-31149459
A_19_P00315603	-4.19911	-2.07008	down	0.962507	0.861856	0.914124	-0.991594	-0.861856	-1.61831	XLOC_l2_015760	BROAD Institute lincRNA (XLOC_l2_015760), lincRNA [TCONS_l2_00030536]	ATCCAGATGTCCTGTTACTGGAAGGGCACCATAGTTTATCCTGCACCTAACACTAATACA				chrX:73498186-73498127
A_33_P3357591	-3.5133	-1.81283	down	0.796137	0.756459	0.980759	-0.931797	-0.756459	-1.21687	ATHL1	Homo sapiens ATH1, acid trehalase-like 1 (yeast) (ATHL1), mRNA [NM_025092]	CCGACGAGTACCATTCAGGGGTCAACAACTCTGTGTACACCAACGTCCTGGTCCAGAACA	80162	NM_025092	ATH1, acid trehalase-like 1 (yeast)	chr11:293175-293234
A_24_P367432	-3.81588	-1.93201	down	1.05673	0.768922	0.879789	-0.768922	-1.03748	-1.2842		immunoglobulin heavy variable 1-69 [Source:HGNC Symbol;Acc:HGNC:5558] [ENST00000390633]	CAGGCCCCTGGACAAGGGCTTGAGTGGATGGGAAGGATCATCCCTATCCTTGGTATAGCA		KJ880584		chr14:107170110-107170051
A_24_P394940	-5.1659	-2.36902	down	0.927694	1.17073	1.15782	-0.927694	-1.27175	-1.65137	CYP2E1	Homo sapiens cytochrome P450, family 2, subfamily E, polypeptide 1 (CYP2E1), mRNA [NM_000773]	TGAAGTAAAAGAGTATGTGTCTGAAAGGGTGAAGGAGCACCATCAATCTCTGGACCCCAA	1571	NM_000773	cytochrome P450, family 2, subfamily E, polypeptide 1	chr10:135346267-135346326
A_33_P3305655	-3.78676	-1.92097	down	1.0823	0.790468	0.953743	-0.790468	-1.00049	-1.14543	NBEAP1	Homo sapiens neurobeachin pseudogene 1 (NBEAP1), non-coding RNA [NR_027992]	TACCATCTACACCACCATATGCAGAATAGGAACAGTTATTAAAGATAATGCACACCTTAA	606	NR_027992	neurobeachin pseudogene 1	chr15:20874916-20874857
A_21_P0013747	-9.15358	-3.19434	down	1.47322	1.26044	1.5286	-2.45309	-1.26044	-1.60722	XLOC_l2_015438	BROAD Institute lincRNA (XLOC_l2_015438), lincRNA [TCONS_l2_00030118]	TATAAGAAGGGCCCTAAATGCAATGACAGCTGTTCTAAGAGACAGAAGAGGAGACGCAGA				chrX:1881853-1881912
A_33_P3328087	-5.21037	-2.38139	down	1.22213	1.03393	1.34473	-1.31929	-1.19015	-1.03393		Homo sapiens clone FLB9413 PRO2532 mRNA, complete cds. [AF130075]	CCACATATACAACGGTGGTCCCATAAGATTATACTGCTGTATTTTTACTGTATCTTTTCT		AF130075		chr4:174389279-174389338
A_24_P314554	-4.97935	-2.31596	down	1.28964	1.22774	0.951501	-1.21713	-1.31036	-0.951501	GOLGA2P2Y	Homo sapiens golgin A2 pseudogene 2, Y-linked (GOLGA2P2Y), non-coding RNA [NR_001555]	ACTGCAGTTGGAGCGGCAAGTAAAGGAGCTGAAGCTTGGAGAACCTGGAAGCTACCAGCC	84559	NR_001555	golgin A2 pseudogene 2, Y-linked	chrY:27603553-27604968
A_24_P374973	-3.80392	-1.92749	down	1.44806	0.887249	0.733037	-0.733037	-1.0706	-0.910465		ribosomal protein L7 pseudogene 14 [Source:HGNC Symbol;Acc:HGNC:35984] [ENST00000449851]	GGCATGAGTTTACCGGTGGAGAGAACCGTTGTAAGACTTCGCCTGAAGAAAATGTTTAGT				chr2:203905122-203905181
A_32_P178758	-4.48697	-2.16574	down	1.30719	0.855234	1.0718	-0.855234	-1.14281	-1.26496	LY86-AS1	Homo sapiens LY86 antisense RNA 1 (LY86-AS1), long non-coding RNA [NR_026970]	CCATCTGAGAACAAAAGTTGTTGCTACTTCTCAGAGGCATTGAGACACACTGCATGCTGT	285780	NR_026970	LY86 antisense RNA 1	chr6:6346843-6346784
A_21_P0012439	-4.4016	-2.13803	down	1.0249	0.777633	1.12653	-1.15161	-0.777633	-1.55578	TRANK1	Homo sapiens tetratricopeptide repeat and ankyrin repeat containing 1 (TRANK1), mRNA [NM_014831]	AAGTTTCTTGCCTTGCTTTGATCATATTTTCACAACTGGATTCCCAACAGAAGTGTGGCA	9881		tetratricopeptide repeat and ankyrin repeat containing 1	chr3:36937230-36937171
A_33_P3335624	-3.61416	-1.85366	down	1.25028	0.971225	0.783976	-0.936501	-0.783976	-0.835024	PSMD10	proteasome (prosome, macropain) 26S subunit, non-ATPase, 10 [Source:HGNC Symbol;Acc:HGNC:9555] [ENST00000338548]	TTTAAGGTAAACATACAGGAGAGGCTGAGGTAGGAGGATTGCTCCAGCCTAGTAGTTTGA	5716		proteasome (prosome, macropain) 26S subunit, non-ATPase, 10	chrX:107331777-107331718
A_33_P3280905	-5.03345	-2.33155	down	0.989967	1.28969	1.1959	-1.18161	-0.989967	-1.34751		GB	TCATAGATTCCTTCGTTCACGACATCTTGGAGCACATCGCCACCAAGGCCGGCCACTTGG				chrX:103159435-103159376
A_24_P161764	-3.38267	-1.75816	down	0.954698	0.729968	0.771234	-0.729968	-0.893858	-1.19476		immunoglobulin heavy variable 1-3 [Source:HGNC Symbol;Acc:HGNC:5552] [ENST00000390595]	GTTTCCTGCAAGGCTTCTGGATACACCTTCACTAGCTATGCTATGCATTGGGTGCGCCAG		L04336		chr14:106471482-106471423
A_24_P942630	-4.28604	-2.09964	down	0.785481	0.964904	1.14773	-0.785481	-1.13834	-1.477	KDM6B	Homo sapiens lysine (K)-specific demethylase 6B (KDM6B), mRNA [NM_001080424]	TGTACATGTCTCTTTATTCACTTGGTTATGATTTGTATTTTTTGTTCTTTTCTTGTTTTT	23135	NM_001080424	lysine (K)-specific demethylase 6B	chr17:7757327-7757386
A_21_P0007073	-6.73867	-2.75246	down	1.22677	1.21453	1.25186	-1.21453	-1.75094	-1.59876	lnc-SCD-1	LNCipedia lincRNA (lnc-SCD-1), lincRNA [lnc-SCD-1:6]	AACACACTAAAGATTGGGCAGTCACTGGGGAGAACTGCAATTAACCTTTAAGATACTACG			lnc-SCD-1:6	chr10:102133735-102140676
A_23_P123848	-7.54813	-2.91612	down	1.19527	1.34434	1.33471	-1.4118	-1.19527	-2.26696	DAB2IP	Homo sapiens DAB2 interacting protein (DAB2IP), transcript variant 1, mRNA [NM_032552]	TGACTTTTTTGCTTAACTTCCATGTTCTGGGTGATGGAAACTGCCAAACCTCCTGTCAGT	153090	NM_032552	DAB2 interacting protein	chr9:124547348-124547407
A_24_P245298	-4.60825	-2.20422	down	0.865994	0.977109	1.16222	-1.14815	-0.865994	-1.59318	TNFSF12	Homo sapiens tumor necrosis factor (ligand) superfamily, member 12 (TNFSF12), transcript variant 1, mRNA [NM_003809]	CCTCCCTTGAGAATTCCCTGTGGATTTTTAAAACAGATATTATTTTTATTATTATTGTGA	8742	NM_003809	tumor necrosis factor (ligand) superfamily, member 12	chr17:7461108-7461167
A_24_P269129	-3.91621	-1.96946	down	1.01265	0.838233	0.858462	-0.838233	-1.1008	-1.25999	ZDHHC14	Homo sapiens zinc finger, DHHC-type containing 14 (ZDHHC14), transcript variant 2, mRNA [NM_153746]	CTCTCAGGATTCCACACCTACTTGATCAGCTCCAACCAGACAACAAATGAGGACATTAAA	79683	NM_153746	zinc finger, DHHC-type containing 14	chr6:158066818-158068296
A_33_P3312897	-6.04225	-2.59509	down	1.52035	1.02828	1.20252	-1.02828	-1.51623	-1.48961		immunoglobulin heavy variable 3-72 [Source:HGNC Symbol;Acc:HGNC:5622] [ENST00000433072]	AAACAAAGCTAACAGTTACACCACAGAATACGCCGCGTCTGTGAAAGGCAGATTCACCAT		KP092458		chr14:107199076-107199017
A_33_P3323928	-5.72086	-2.51623	down	1.13426	1.18871	1.32974	-1.13426	-1.14329	-1.61843	OLMALINC	Homo sapiens long intergenic non-protein coding RNA 263 (LINC00263), long non-coding RNA [NR_026762]	CAAAAACGCCTCTTATGGAAAAGCCAGAGCGCCAGGAGTCAGCAAAACACACTAAAGATT	90271	NR_026762	oligodendrocyte maturation-associated long intergenic non-coding RNA	chr10:102133690-102133749
A_33_P3304097	-3.09136	-1.62824	down	0.653766	0.933187	0.928362	-0.79989	-0.915754	-0.653766			ATGCACACATACACATATAAACATACACACACACACATATACACTAATAGATTATATTGA				chr7:148344398-148344339
A_23_P106389	-3.24217	-1.69696	down	0.514458	0.859143	1.01694	-1.15525	-0.514458	-1.03064	SEMA7A	Homo sapiens semaphorin 7A, GPI membrane anchor (John Milton Hagen blood group) (SEMA7A), transcript variant 1, mRNA [NM_003612]	GCCTTGCATGTTTATTGAAGGATGTTTGCTTTCCGGACGGAAGGACGGAAAAAGCTCTAT	8482	NM_003612	semaphorin 7A, GPI membrane anchor (John Milton Hagen blood group)	chr15:74702424-74702365
A_21_P0008570	-5.44419	-2.44472	down	1.3149	0.964013	1.09357	-0.964013	-1.02392	-1.97373	lnc-USP8-2	Homo sapiens cDNA clone IMAGE:5261717. [BC035091]	CTCTCACCTTTTCCCAGCTATTTGGATGTATATACTTTTGCTTACTTTGTAGTGTACCAA			lnc-USP8-2:8	chr15:50660096-50660155
A_33_P3413815	-3.60149	-1.8486	down	1.04442	0.746962	0.823415	-0.746962	-0.857588	-1.32644	LAMB2P1	Homo sapiens laminin, beta 2 pseudogene 1 (LAMB2P1), non-coding RNA [NR_004405]	CCTCAGGTGGGAGTTTCGGAAACAAAAGGGAAATTGATTAAACTTGTATTATACACTGGA	22973	NR_004405	laminin, beta 2 pseudogene 1	chr3:49190351-49190292
A_21_P0009119	-4.23768	-2.08327	down	1.0089	0.845906	0.853124	-0.845906	-0.944366	-1.75162	lnc-SPIRE2-1	Homo sapiens cDNA clone IMAGE:5265909. [BC035173]	AACGCTGATAACAGGTAATTTTTCTGATGGGGCAGCAGTAGGATCAACACAGCTGAGAAA			lnc-SPIRE2-1:1	chr16:89884557-89884616
A_33_P3357382	-3.25248	-1.70154	down	0.857128	0.626348	0.675931	-0.626348	-0.987514	-1.33135	POGZ	pogo transposable element with ZNF domain [Source:HGNC Symbol;Acc:HGNC:18801] [ENST00000485040]	GAATGAGCATGGCTGTGCTCCACTAAAAACTATTTATGGACTCTGAAATTTAAGTTTCAT	23126	BC057773	pogo transposable element with ZNF domain	chr1:151399803-151399744
A_23_P111995	-5.24958	-2.3922	down	0.993405	0.999998	1.13707	-0.993405	-1.15771	-1.89502	LOXL2	Homo sapiens lysyl oxidase-like 2 (LOXL2), mRNA [NM_002318]	TGACTCATCTTCCTGTTGTTCCAATTCTGTGGGTTTTTGATTCAACGGTGCTATAACCAG	4017	NM_002318	lysyl oxidase-like 2	chr8:23154845-23154786
A_24_P288915	-5.30145	-2.40639	down	1.23193	0.897869	1.06854	-0.897869	-1.35613	-1.76682		coiled-coil domain containing 144B (pseudogene) [Source:HGNC Symbol;Acc:HGNC:26704] [ENST00000445752]	CAGCAGATTCCTAGGAAGGAAAATGAAGAGCATGACAGGTAAGCCTATAGCAGCGTTTAA		AK093811		chr17:18506954-18506895
A_32_P190951	-3.49522	-1.80538	down	0.946141	0.87495	0.866747	-0.866747	-0.988563	-0.872999		immunoglobulin heavy variable 1-46 [Source:HGNC Symbol;Acc:HGNC:5554] [ENST00000390622]	ACAGAAGTTCCAGGGCAGAGTCACCATGACCAGGGACACGTCCACGAGCACAGTCTACAT		AY393117		chr14:106967160-106967101
A_21_P0014684	-4.86334	-2.28195	down	1.02624	1.02871	1.19966	-1.34461	-1.02624	-1.22038	LOC102725157	PREDICTED: Homo sapiens nuclear pore complex-interacting protein family member B4-like (LOC102725157), misc_RNA [XR_433225]	TGTTGTGTAGAAATTTCATTGACTGTGTTAAAATTATTCTCCATGGGCTGGAGAACACAT	102725157	XR_433225	nuclear pore complex-interacting protein family member B4-like	chr16:21870629-21870570
A_33_P3300893	-3.14531	-1.6532	down	0.860495	0.634184	0.705909	-0.634184	-0.970508	-1.15433	MADD	Homo sapiens MAP-kinase activating death domain (MADD), transcript variant 7, mRNA [NM_130475]	GTTGTGCTTGTGGCGTAGAAATGGCTCTGAGACCCAGCTCAACAAGTTCTATACTAAAAA	8567	NM_130475	MAP-kinase activating death domain	chr11:47345326-47345385
A_33_P3412438	-3.42856	-1.7776	down	0.655761	0.964748	0.759919	-1.40189	-0.655761	-0.894727			TGTAAGAGGGGGTGTCGGCTGCTCTCCATAGCCAAGTGGCTGCAAAAATCATCATACTGA				chrX:001581810-001581869
A_21_P0000680	-3.34668	-1.74273	down	0.75839	0.762108	0.7149	-0.7149	-1.18847	-1.08942	GAS5-AS1	Homo sapiens GAS5 antisense RNA 1 (GAS5-AS1), long non-coding RNA [NR_037605]	GATGAAAAGCACTGTCCTTTTTTAAGTAAACACTACACACTCCAGATGGATTGCAAAAAT	100506046		GAS5 antisense RNA 1	chr1:173832993-173833052
A_21_P0014686	-3.10908	-1.63649	down	0.776361	0.764011	0.668433	-0.668433	-0.879596	-1.15263		Homo sapiens cDNA FLJ13825 fis, clone THYRO1000558. [AK023887]	AGAAAACTCAGATTTTGTAAATGCGCATCCAGTTGACAGCACTTACGGTGGAATCCGTGG		AK023887		chr16:89463788-89463729
A_33_P3268989	-6.31904	-2.65971	down	1.41567	0.96633	1.22479	-0.966331	-1.57878	-1.82722		ASCC1_HUMAN (Q8N9N2) Activating signal cointegrator 1 complex subunit 1 (ASC-1 complex subunit p50) (Trip4 complex subunit p50), complete [THC2581013]	GGTTCCAGAAGATAACTTTGGATTGTCAGAATATTTATACTTGGAAGTCCAGGCAAGTAA				chr10:073964231-073964172
A_33_P3393582	-5.13105	-2.35926	down	0.362032	0.0739899	-0.0739899	-2.09316	-2.384		CCNDBP1	cyclin D-type binding-protein 1 [Source:HGNC Symbol;Acc:HGNC:1587] [ENST00000564630]	ATAGCTACAGAACAAATGGGCAGAATTTCACTAATCACTAGTATTTCCTGTAAGCTATAG	23582	AK124193	cyclin D-type binding-protein 1	chr15:43485023-43485082
A_21_P0000909	-3.19298	-1.6749	down	0.715789	0.723718	0.613001	-0.613001	-1.10021	-1.25899	LOC284600	PREDICTED: Homo sapiens uncharacterized LOC284600 (LOC284600), misc_RNA [XR_108282]	GAGGTGACAGCAGGTAAAGAGTGAGCCACAATCAGCATTTTCACATGAAAGGAAACTACA	284600	XR_108282	uncharacterized LOC284600	chr1:849983-850042
A_23_P167997	-3.05374	-1.61058	down	0.750042	0.781107	1.0134	-0.766612	-0.770535	-0.750042	HIST1H2BG	Homo sapiens histone cluster 1, H2bg (HIST1H2BG), mRNA [NM_003518]	CAGTCGTAAGGAGAGCTACTCCGTGTATGTGTACAAGGTGCTAAAACAGGTTCACCCCGA	8339	NM_003518	histone cluster 1, H2bg	chr6:26216776-26216717
A_21_P0014765	-3.80604	-1.92829	down	0.84733	0.679985	0.97875	-1.31281	-0.679985	-1.28601		Homo sapiens hypothetical LOC441242, mRNA (cDNA clone MGC:87648 IMAGE:5267764), complete cds. [BC066990]	GAAGTACATTTGACCATTTTAATTGTTTAACATTCCATGTCACACGACCTTCCACAATAG		BC066990		chr7:65020299-65020358
A_21_P0012441	-4.35324	-2.12209	down	0.940281	0.881226	1.05789	-1.22927	-0.881226	-1.37639	TRANK1	PREDICTED: Homo sapiens tetratricopeptide repeat and ankyrin repeat containing 1 (TRANK1), transcript variant X1, mRNA [XM_006713432]	AAGAATGGGAACTTCTCTTTGGCCATCAGAAAGTACGATGAAGCCATCCAGATTCTCCTG	9881	XM_006713432	tetratricopeptide repeat and ankyrin repeat containing 1	chr3:36949890-36949831
A_24_P627984	-3.75854	-1.91017	down	0.737696	0.838946	0.773569	-0.737696	-1.04952	-1.59309	EPM2AIP1	Homo sapiens EPM2A (laforin) interacting protein 1 (EPM2AIP1), mRNA [NM_014805]	TAAATTACCCTTGTGTAAGTTATTTCTTCCATCTTCTGATAGCAATTTCCTGAATGCCTG	9852	NM_014805	EPM2A (laforin) interacting protein 1	chr3:37027665-37027606
A_21_P0013057	-4.7691	-2.25372	down	0.93904	0.853768	0.878614	-0.853768	-1.2642	-1.97176	XLOC_l2_012847	BROAD Institute lincRNA (XLOC_l2_012847), lincRNA [TCONS_l2_00024571]	TGTGAACATGTGTCATACAGAAGGTCAGCACTGCACTGTGTGAACACGCTTCATACAGAA				chr6:2852797-2852738
A_24_P206343	-7.90369	-2.98253	down	1.45041	1.4874	1.52774	-1.45041	-1.47538	-1.55623	MYO1G	Homo sapiens myosin IG (MYO1G), mRNA [NM_033054]	CTGCCACTGACAATCCCACAGCATCAAGCCTGTTTGCTCAGCGACTAAAGACACTTCGGG	64005	NM_033054	myosin IG	chr7:45004545-45004061
A_23_P12392	-8.59023	-3.1027	down	1.48825	1.29441	1.51177	-1.29441	-1.35154	-2.36771	PTPRC	Homo sapiens protein tyrosine phosphatase, receptor type, C (PTPRC), transcript variant 4, non-coding RNA [NR_052021]	GGTAATGCACAATTCCAACTAACGTACATTCAACAGATCATGAAATTGGGTTATTAAAAT	5788	NR_052021	protein tyrosine phosphatase, receptor type, C	chr1:198662240-198662299
A_33_P3344831	-8.23306	-3.04143	down	1.31373	1.45225	1.25113	-1.25113	-1.34284	-2.51321	TMEM45A	Homo sapiens transmembrane protein 45A (TMEM45A), mRNA [NM_018004]	CTACTATTTGTAACTCCTTGACCATGGAATTATACTTGTTTATCTTGTTGCTGCAATGAG	55076	NM_018004	transmembrane protein 45A	chr3:100296198-100296257
A_24_P173746	-3.21402	-1.68438	down	0.764641	0.654675	0.68874	-0.82395	-0.654675	-1.46646	RALGPS2	Homo sapiens Ral GEF with PH domain and SH3 binding motif 2 (RALGPS2), transcript variant 10, mRNA [NM_152663]	AAAGGCTACCGAAAGAAAACATTTCAAATCAACATCCAATAAGAACGTATCTGTGATAGG	55103	NM_152663	Ral GEF with PH domain and SH3 binding motif 2	chr1:178866870-178871278
A_24_P101226	-10.0482	-3.32887	down	1.58965	1.81465	1.22297	-1.22297	-2.03272	-2.10366		immunoglobulin heavy variable 3/OR16-7 (pseudogene) [Source:HGNC Symbol;Acc:HGNC:5642] [ENST00000604106]	CTGTGAAAGGCAGATTCACCATCTCAAGAGTTGATTCAAAAAACACGCTGTATCTGCAAA				chr16:33740912-33740853
A_33_P3358163	-4.44128	-2.15097	down	1.47208	0.896146	0.934674	-0.896146	-1.16695	-1.08693	NPAP1	Homo sapiens nuclear pore associated protein 1 (NPAP1), mRNA [NM_018958]	GCCTTACTAAATAAATTTATGTTCAAGTGCTATTTCTTTACGACACCGAGGAACAAGCAT	23742	NM_018958	nuclear pore associated protein 1	chr15:24928526-24928585
A_33_P3232493	-4.70476	-2.23412	down	1.21993	0.962428	1.01281	-0.962428	-1.27081	-1.27395		Homo sapiens cDNA FLJ27284 fis, clone TMS01544. [AK130794]	TTATCATAGTGAACATTTTAAAATGGAGTCACCCAGGACTGGGCACGGTGACTCATGCCT		AK130794		chr8:066645279-066645220
A_33_P3345743	-5.30349	-2.40694	down	1.16159	1.13506	1.02017	-1.48931	-1.02017	-1.39452	PFN1P2	Homo sapiens profilin 1 pseudogene 2 (PFN1P2), non-coding RNA [NR_003242]	TCTATCATTCCGCGTTTGGGCTATTACGAAGAAACTATCATGAGCATCCATACGTGGCAG	767846	NR_003242	profilin 1 pseudogene 2	chr1:146061471-146061530
A_24_P287974	-5.84709	-2.54772	down	1.61808	1.10803	1.01181	-1.01181	-1.58514	-1.30828	CUEDC1	Homo sapiens CUE domain containing 1 (CUEDC1), transcript variant 2, mRNA [NM_001292025]	CCGAGCCTTCTCAGAGAAGACCAAAATGAGGAAGTCAAAGAGGAAACACTTGTTGAAGCA	404093	NM_001292025	CUE domain containing 1	chr17:55945576-55945517
A_33_P3384133	-3.83418	-1.93892	down	1.03318	0.705469	0.798618	-0.705469	-1.01394	-1.56008	C17orf99	Homo sapiens chromosome 17 open reading frame 99 (C17orf99), mRNA [NM_001163075]	AGCGTGCACTGTTCGTATTTGGAGTTCATGCAAAATGAGTGTGTTTTAGCTGCTCTTGCC	100141515	NM_001163075	chromosome 17 open reading frame 99	chr17:76162175-76162234
A_23_P140190	-4.08745	-2.0312	down	0.895372	0.857515	0.898104	-0.857515	-0.983361	-1.60174	KIAA0125	Homo sapiens KIAA0125 (KIAA0125), long non-coding RNA [NR_026800]	ACATTGGGAAGGGATGGAGGATGGACGGAGGAAGGACGTGCAGTTGCAGCTCTTTCTGCA	9834	NR_026800	KIAA0125	chr14:106388126-106388185
A_21_P0013344	-4.33817	-2.11709	down	1.09275	1.17098	0.741457	-0.741457	-0.971865	-1.63275	AZGP1	Homo sapiens alpha-2-glycoprotein 1, zinc-binding (AZGP1), mRNA [NM_001185]	TCAGAAGGCCAGGGAGGACATCTTTATGGAGACCCTGAACAACATCATGGAGTATTACAA	563	NM_001185	alpha-2-glycoprotein 1, zinc-binding	chr7:99569439-99569380
A_33_P3415247	-3.66293	-1.873	down	0.726987	0.772194	0.878194	-0.726987	-1.20578	-1.30885	LOC115110	Homo sapiens uncharacterized LOC115110 (LOC115110), long non-coding RNA [NR_037844]	ATGAACCGTGGACACACACTGCACGGCGGATGAATATGCAGACATCAGGCCACGTGAAGG	115110	NR_037844	uncharacterized LOC115110	chr1:2482526-2482467
A_33_P3331228	-3.41732	-1.77286	down	0.759809	0.895329	0.667241	-0.667241	-0.915057	-1.41392		immunoglobulin heavy variable 3-15 [Source:HGNC Symbol;Acc:HGNC:5582] [ENST00000390603]	CAAAAAACACGCTGTATCTGCAAATGAACAGCCTGAAAACCGAGGACACAGCCGTGTATT		AY505570		chr14:106610383-106610324
A_23_P48495	-3.13865	-1.65014	down	0.835157	0.681392	0.773272	-0.681392	-0.733776	-1.24544	TCL1B	Homo sapiens T-cell leukemia/lymphoma 1B (TCL1B), mRNA [NM_004918]	TGTGCTTCTGCTTATTCAGTCCTTCAGCTCACGGAAGGGATGCTAGTCCGTGAAGGTGAC	9623	NM_004918	T-cell leukemia/lymphoma 1B	chr14:96158867-96158926
A_32_P24372	-3.17244	-1.66559	down	0.93998	1.02581	0.672501	-0.672501	-0.972705	-0.713277	TBC1D3C	Homo sapiens TBC1 domain family, member 3C (TBC1D3C), mRNA [NM_001001418]	TGTTAAACTTATGAGAATGTATTAAGAAAGAGTGCAGCTCGAGAGACATTCAGAGATGGA	414060	NM_001001418	TBC1 domain family, member 3C	chr17:36294685-36294743
A_23_P388871	-15.6386	-3.96704	down	1.56626	2.35119	2.04003	-2.64236	-1.56626	-1.73502	HIST4H4	Homo sapiens histone cluster 4, H4 (HIST4H4), mRNA [NM_175054]	ACAGTGGGCAGCCCGATTTTCTGCTGAGTAGGCGCTGTGATTTCAGAATGTCTGGGCGAG	121504	NM_175054	histone cluster 4, H4	chr12:14924065-14924006
A_23_P89062	-3.09504	-1.62996	down	0.790368	0.827793	0.725887	-0.725887	-0.738952	-1.08099	CLUHP3	Homo sapiens clustered mitochondria (cluA/CLU1) homolog pseudogene 3 (CLUHP3), long non-coding RNA [NR_024034]	GCTGCAGATGATGAGGGACCTACCCAACAAGAACCAACCTGAGCAGCTGCTTCAAGAAAA	100132341	NR_024034	clustered mitochondria (cluA/CLU1) homolog pseudogene 3	chr16:31718232-31718291
A_33_P3330991	-4.55239	-2.18662	down	1.00246	1.08036	1.27794	-1.00246	-1.04569	-1.15095	LOC100134237	PREDICTED: Homo sapiens uncharacterized LOC100134237 (LOC100134237), misc_RNA [XR_248772]	TCCATGCATGCATCTATTCATCCATCCATCCATCTACTCAATAAAAGTGTGAGGTCCTAG	100134237	XR_248772	uncharacterized LOC100134237	chr1:32012152-32012211
A_21_P0011804	-6.37402	-2.6722	down	1.034	1.55153	1.41229	-1.034	-1.5817	-1.40309	LOC100507006	Homo sapiens uncharacterized LOC100507006 (LOC100507006), long non-coding RNA [NR_120420]	CTAATTTCGTAACCTGACTCTCTATAAGAAAAAGTAGGAGAAAGACTGAAGAACCCGAGA	100507006	NR_120420	uncharacterized LOC100507006	chr2:64479052-64479111
A_21_P0012995	-4.80854	-2.2656	down	1.00991	1.0324	0.844392	-0.844392	-1.33536	-1.73034	lnc-TAF9-2	zi16a07.s1 Soares_fetal_liver_spleen_1NFLS_S1 Homo sapiens cDNA clone IMAGE:430932 3', mRNA sequence [AA678297]	GACAATGGGTAAATAGAATTTTTCAGATTATTAAAAGCTGAAGGATGCCCACGTAAGCAA			lnc-TAF9-2:1	chr5:68932256-68932197
A_19_P00322416	-3.54253	-1.82478	down	0.303203	0.0286963	-0.0286963	-1.61093	-1.8365		LINC00888	Homo sapiens long intergenic non-protein coding RNA 888 (LINC00888), transcript variant 1, long non-coding RNA [NR_038301]	ACGAGGCATAAAGCCGCGGTGGATCGGTGCGTGGGGGCGCGGGGTGGGTGGTGAAGGGAG	100505687	NR_038301	long intergenic non-protein coding RNA 888	chr3:183165557-183165616
A_33_P3380161	-3.47676	-1.79774	down	1.03117	0.71574	0.711055	-0.711055	-0.907944	-1.31626	HNRNPU-AS1	Homo sapiens HNRNPU antisense RNA 1 (HNRNPU-AS1), long non-coding RNA [NR_026778]	CTGTTGGAAGAGACAAAATGTGACTTGGTTCATAATAAAGCAAGAATTATTTACTCTCGG	284702	NR_026778	HNRNPU antisense RNA 1	chr1:245004000-245003941
A_23_P359870	-9.7072	-3.27906	down	1.35535	1.38676	1.40702	-1.35535	-1.47853	-2.85416		Homo sapiens mRNA for hypothetical protein (C8ORF16). [AJ312026]	CTGAGGTTATAATTTTCACTTAACATTGTCGAGTTGGCATTTTGGTTTTAGTCCAATGGT		AJ312026		chr8:10984299-10984240
A_24_P389916	-10.5986	-3.40581	down	1.60924	1.57077	1.46749	-1.80621	-1.46749	-2.29622	LRRC32	Homo sapiens leucine rich repeat containing 32 (LRRC32), transcript variant 1, mRNA [NM_005512]	AAGAATGGACGTGCTGGGACCAACTCAAGACCTTGTTTTGCTGTCTTCATCATCTTACCT	2615	NM_005512	leucine rich repeat containing 32	chr11:76369017-76368958
A_33_P3351101	-3.31622	-1.72954	down	0.765398	0.825656	0.761898	-0.761898	-0.762788	-1.31098	TYSND1	Homo sapiens trypsin domain containing 1 (TYSND1), transcript variant 1, mRNA [NM_173555]	TCTCATAGTCCTTGTTCCAGTCTTTGTTAGAATACTGGGTATGTTAGGGCTTGGGACAGG	219743	NM_173555	trypsin domain containing 1	chr10:71898108-71898049
A_33_P3782529	-3.14621	-1.65361	down	0.816789	0.575984	0.983396	-0.575984	-0.828816	-1.17987	LOC553103	Homo sapiens uncharacterized LOC553103 (LOC553103), long non-coding RNA [NR_110997]	GCAACATCTCAAGGGAGGTGACAAAAATTTCAAAGTGTGTTTAGTGACCTTTCATTTATT	553103	NR_110997	uncharacterized LOC553103	chr5:131647062-131647003
A_21_P0008716	-4.56451	-2.19046	down	0.827913	0.970507	1.07826	-0.827913	-1.15086	-1.71593	lnc-TRPM1-1	LNCipedia lincRNA (lnc-TRPM1-1), lincRNA [lnc-TRPM1-1:2]	GAAAACCAGGAAAAATGCCACCAACAGACTAGAACATTGGAGAATTTCTGGAAGATATAA			lnc-TRPM1-1:2	chr15:31514746-31514687
A_23_P411761	-4.78845	-2.25956	down	-0.00895548	0.164365	0.00895548	-2.14068		-2.26886	CABP1	Homo sapiens calcium binding protein 1 (CABP1), transcript variant 3, mRNA [NM_001033677]	AATGGTGATGGGGAAATAAGCACCAGTGAGCTGCGAGAGGCTATGAGGAAGCTCCTGGGT	9478	NM_001033677	calcium binding protein 1	chr12:121098883-121098942
A_33_P3397795	-3.76111	-1.91116	down	1.21073	1.02523	0.848984	-0.848984	-0.939343	-0.860207	PCNXL4	Homo sapiens cDNA FLJ38170 fis, clone FCBBF1000024. [AK095489]	ACAGATGATATGTTAACATACATTGCACCGAGGCTGAAGTGGGAGGATTGCTTGAGACTG	64430	AK095489	pecanex-like 4 (Drosophila)	chr14:60635679-60635738
A_21_P0011461	-3.1405	-1.65099	down	0.659801	0.627409	0.913015	-0.92561	-0.627409	-1.19974	XLOC_l2_005438	BROAD Institute lincRNA (XLOC_l2_005438), lincRNA [TCONS_l2_00010087]	CCAACAATGTGTTGATGTTTGCCATGTTCAACTAGTGCACTGTGGAACTCGTATTCGACA				chr16:30291769-30291062
A_23_P431179	-13.154	-3.71743	down	1.57386	1.72123	1.80364	-1.85021	-1.57386	-2.6295	HIST1H4A	Homo sapiens histone cluster 1, H4a (HIST1H4A), mRNA [NM_003538]	TTTGGCGGTTAAGGTTGCTGATTTCTCCACAGCTTGCATTTCTGAACCAAAGGCCCTTTT	8359	NM_003538	histone cluster 1, H4a	chr6:26022207-26022266
A_21_P0007577	-3.9086	-1.96665	down	1.16455	0.965137	0.75902	-0.75902	-1.0669	-1.18533	SLC35E3	solute carrier family 35, member E3 [Source:HGNC Symbol;Acc:HGNC:20864] [ENST00000399333]	TGGTAAGTAGCAGAAATCAACTGTATTTGTTTGCTAAGGCTGTGCTAATAAAGTGCTGTA	55508		solute carrier family 35, member E3	chr12:69187680-69187739
A_23_P218784	-3.14584	-1.65345	down	0.664556	0.792931	0.917271	-0.664556	-0.757237	-1.16379	DDX17	Homo sapiens DEAD (Asp-Glu-Ala-Asp) box helicase 17 (DDX17), transcript variant 1, mRNA [NM_006386]	CATGGAGACAAGAGTCAACCAGAAAGAGATTGGGTACTTAATGAGTTCCGTTCTGGAAAG	10521	NM_006386	DEAD (Asp-Glu-Ala-Asp) box helicase 17	chr22:38889757-38888104
A_21_P0014606	-3.74526	-1.90507	down	0.881497	0.940683	0.826967	-0.967014	-0.826967	-1.27207	LOC101929516	Homo sapiens uncharacterized LOC101929516 (LOC101929516), long non-coding RNA [NR_125979]	TAGTCTGCAATCCACCTATGGAGACAAGTGACAAAACCTGTAAAGCAAATGATCTGGAAA	101929516	NR_125979	uncharacterized LOC101929516	chr1:40038784-40038843
A_24_P67898	-3.14981	-1.65527	down	0.841549	0.676251	0.742727	-0.676251	-0.851121	-1.1779	MGEA5	Homo sapiens meningioma-expressed antigen 5s splice variant mRNA, complete cds. [AF307332]	AGATATCTGAAACACCGTGAGCTTAGAATAAAAAGTAGTAGTGAGATTTTCCACTTTCTG	10724	AF307332	meningioma expressed antigen 5 (hyaluronidase)	chr10:103556891-103556832
A_21_P0011311	-6.31241	-2.65819	down	1.1732	1.18001	1.10278	-1.10278	-1.22642	-2.18939		golgin A8 family, member R [Source:HGNC Symbol;Acc:HGNC:44407] [ENST00000624918]	GAGGGTAATTCTTAAGATTGTGGATGGACTGCTGGGTACTGGTTAAGAATTCTGGCTTTA				chr15:32887640-32887699
A_33_P3762913	-4.38	-2.13093	down	1.06097	0.83618	0.911728	-0.958485	-0.83618	-1.78924	LINC01004	Homo sapiens long intergenic non-protein coding RNA 1004 (LINC01004), long non-coding RNA [NR_039981]	TAGGTAGCTGCCCTCCTTGGGCAGCTTTTGACTCCTATGCCAAATTTTAAAATAAAGGCC	100216546	NR_039981	long intergenic non-protein coding RNA 1004	chr7:104628139-104628080
A_33_P3412468	-3.48679	-1.8019	down	1.00953	0.642262	0.624759	-0.624759	-1.16141	-1.34299	SLC25A27	Homo sapiens solute carrier family 25, member 27 (SLC25A27), transcript variant 1, mRNA [NM_004277]	GCTTAACTTCCCAAGTGTTCTGCATTGAACCACTTAGGGAAAATTTTGTTTGTTTTTATG	9481	NM_004277	solute carrier family 25, member 27	chr6:46645803-46645862
A_19_P00320611	-6.40607	-2.67944	down	0.47046	0.103998	-0.103998	-2.3633	-2.68193		LOC101927151	PREDICTED: Homo sapiens uncharacterized LOC101927151 (LOC101927151), transcript variant X2, ncRNA [XR_424964]	TCAGAATTACAAGGTGAGATCAGCCGCCCGGCCAAGCTATCTTCTCGCTAGCAGGTGAGG	101927151	XR_424964	uncharacterized LOC101927151	chr19:28284505-28284564
A_19_P00322109	-4.40673	-2.13971	down	0.947781	0.852177	0.887701	-0.852177	-1.14943	-1.72986	LOC401320	Homo sapiens uncharacterized LOC401320 (LOC401320), long non-coding RNA [NR_038889]	ATAGCCAAGTGTAATCATCAGTAACCCTGTGTTCTATCCACAGGTAAAAAACAATCATCC	401320	NR_038889	uncharacterized LOC401320	chr7:30590294-30590235
A_19_P00316105	-3.91229	-1.96801	down	1.25073	0.936483	0.757933	-1.22252	-0.97845	-0.757933	L3MBTL1	Homo sapiens mRNA for KIAA0681 protein, partial cds. [AB014581]	TGGCTTAAGCTAAGGTGACTCTTGAAGGAGAAAAAGTTACAAACAAAATGTGGTGTGATC	26013	AB014581	l(3)mbt-like 1 (Drosophila)	chr20:42179487-42179546
A_33_P3214785	-3.67364	-1.87721	down	0.799316	0.74008	0.771005	-1.05636	-0.74008	-1.52479	LEPROT	Homo sapiens cDNA FLJ37482 fis, clone BRAWH2013941. [AK094801]	GGAGTGAAAAGAGAGATGGGGTTGGATTTTTGGTCAACTCCAACTTTAAGAGATTCAGAG	54741	AK094801	leptin receptor overlapping transcript	chr1:65888975-65889034
A_33_P3396444	-3.41665	-1.77258	down	0.690377	0.875364	0.912166	-0.690377	-0.695165	-1.4543	PTGR1	prostaglandin reductase 1 [Source:HGNC Symbol;Acc:HGNC:18429] [ENST00000374313]	ATGAGGTGAGATGGTCACATGGGGATGAAGTAATTCTTTAACATACATCTGTATGCAGAA	22949	AK309450	prostaglandin reductase 1	chr9:114354706-114354647
A_33_P3362326	-3.20606	-1.6808	down	0.744699	0.923746	0.873948	-0.874107	-0.881206	-0.744699	FHL2	Homo sapiens mRNA; cDNA DKFZp781J01103 (from clone DKFZp781J01103). [CR936682]	TCCATGGATTCCTCATCTGTGGATTCAACCAACTGTGGATCAAAAGTATTTAGGAAAAAA	2274	CR936682	four and a half LIM domains 2	chr2:105974230-105974171
A_33_P3272773	-3.16686	-1.66305	down	0.593425	0.801137	0.874761	-1.15148	-0.593425	-0.974926	ZNF217	Homo sapiens zinc finger protein 217 (ZNF217), mRNA [NM_006526]	TGTGATTGTACTGTACATAAAACATATGAGGAATCTGCAAGGAACACTACAGTTGTGTAA	7764	NM_006526	zinc finger protein 217	chr20:52185714-52185655
A_21_P0005658	-3.29196	-1.71895	down	0.872963	0.691951	1.03738	-0.991741	-0.691951	-0.870857			TGGTTGAAGAAACCAGTCTGACTGTCTCTGAGGCTATGGAGCAGTCCATGAAGAATGAAA				chr3:129835702-129835761
A_33_P3386870	-3.47194	-1.79574	down	0.614767	1.1361	0.890011	-0.866549	-0.614767	-1.26503			TGTGTGAGCTCTGCAGAGAGGGCGATGTGCTGTTCCCATTCGACAGCCACACGTCTGTAT				chr17:20517131-20517190
A_23_P348183	-3.16465	-1.66205	down	0.695851	0.780427	0.695631	-0.695631	-1.02737	-1.09123	C6orf223	Homo sapiens chromosome 6 open reading frame 223 (C6orf223), transcript variant 1, mRNA [NM_153246]	CAGTCCGTGACTTGGGTGGCACCCTATCTTCTCCATCAGGGATGGTAGCTATTTTTCTGC	221416	NM_153246	chromosome 6 open reading frame 223	chr6:43971960-43972019
A_32_P65589	-4.54599	-2.18459	down	1.08362	1.13676	0.940051	-1.17427	-1.27903	-0.940051		Homo sapiens partial mRNA for immunoglobulin anti-gp96/grp94 variable region of heavy chain (DP-3 derivative gene), clone H11B. [AJ252276]	AGATGGTGAAACAATATACGCAGAGAAGTTCCAGGGCAGAGTCACCATAACCGCGGACAC		AJ252276
A_23_P107166	-3.31181	-1.72762	down	0.715781	1.10672	0.919942	-0.715781	-0.811622	-0.913014	ACBD4	Homo sapiens acyl-CoA binding domain containing 4 (ACBD4), transcript variant 2, mRNA [NM_024722]	CCAAAAGAGGTGACTGTCAGTGGAGGGGTCTCTGCAGCCAACTGAGACTATCTTGCTGTG	79777	NM_024722	acyl-CoA binding domain containing 4	chr17:43220926-43220985
A_23_P155052	-3.00083	-1.58536	down	0.752607	0.640901	0.960956	-0.906494	-0.854221	-0.640901	APOL6	Homo sapiens apolipoprotein L, 6 (APOL6), mRNA [NM_030641]	ATCTTAGAAACACCTTGAAGTATGCCAAGAAAAACGTCCGTGCATTTTGGAAACTCAGAG	80830	NM_030641	apolipoprotein L, 6	chr22:36055129-36055188
A_33_P3246593	-8.88164	-3.15083	down	1.26134	1.38488	1.51743	-2.0357	-1.26134	-1.99179	NUGGC	Homo sapiens nuclear GTPase, germinal center associated (NUGGC), mRNA [NM_001010906]	CCTGCAGGAGAAAATGACAGAAATTGGGATAAGAAGTGGCTGGAAATATGATAGCTGCAA	389643	NM_001010906	nuclear GTPase, germinal center associated	chr8:27888841-27888782
A_21_P0012542	-5.35905	-2.42198	down	0.895216	0.951452	1.01422	-1.42416	-0.895216	-2.08567	LINC00877	Homo sapiens long intergenic non-protein coding RNA 877 (LINC00877), long non-coding RNA [NR_104116]	TTGAGACTGAGAAGAGGAAAACTGAGGACATTCATGTGAGATGGTTTCAAGTTTCCCTTA	285286	NR_104116	long intergenic non-protein coding RNA 877	chr3:72110143-72110084
A_24_P303199	-5.53534	-2.46867	down	1.08837	1.19849	1.28996	-1.08837	-1.13999	-1.60083	ARL15	Homo sapiens ADP-ribosylation factor-like 15 (ARL15), mRNA [NM_019087]	CAGATGAAATATTCTTTGGCATACTTTGTAGACTTTGACCACTTAAAATACTAAGTGGCC	54622	NM_019087	ADP-ribosylation factor-like 15	chr5:53181118-53181059
A_21_P0014215	-5.91059	-2.5633	down	0.94792	1.24407	1.20447	-0.94792	-1.22705	-2.11847		Q4HBG2_9DEIO (Q4HBG2) Beta-lactamase-like, partial (5%) [THC2582227]	TGTGTGACTGCATAACAACGGGTTACTCATTTCCTCTGGAAAACTTCACAGGGCCTCTTT				chr8:128944183-128944242
A_21_P0014932	-5.80458	-2.53719	down	1.03271	1.37681	1.34774	-1.08407	-1.03271	-1.73753	LOC100507006	PREDICTED: Homo sapiens uncharacterized LOC100507006 (AC074289.1), transcript variant X3, ncRNA [XR_425407]	TGAGTGTGGAGGGCAGTTTTACATCTCAGGACAATGTTTTCTCAGATGCTCTTCCAGAAA	100507006	XR_425407	uncharacterized LOC100507006	chr2:64478778-64478837
A_23_P20894	-3.02201	-1.59551	down	0.852271	0.597809	0.881992	-0.597809	-0.777628	-1.07902	EHMT1	Homo sapiens euchromatic histone-lysine N-methyltransferase 1 (EHMT1), transcript variant 1, mRNA [NM_024757]	TGATTTCAGACTCAGAAGCCGACGTTCGAGAGGAAGATTCTTACCTCTTTGATCTCGACA	79813	NM_024757	euchromatic histone-lysine N-methyltransferase 1	chr9:140712526-140712585
A_23_P257164	-3.18991	-1.67352	down	0.656921	0.637392	0.723106	-0.637392	-1.00359	-1.36215	AMT	Homo sapiens aminomethyltransferase (AMT), transcript variant 1, mRNA [NM_000481]	GGAATGATTGCTGACTCACAGTAGGGCTGCTATGCCTGTGTGTAAACTTGGGGATGGCTG	275	NM_000481	aminomethyltransferase	chr3:49454494-49454435
A_21_P0006686	-3.72784	-1.89834	down	0.678602	0.851344	0.943329	-1.28551	-0.678602	-1.25763	lnc-FAM22B-1	Homo sapiens cDNA clone IMAGE:5301900. [BC047063]	GATCTGCGGAGAAATATATCTCTGTTATTTCAAGGCTCATATGACATTAACAGACAAGAC			lnc-FAM22B-1:2	chr10:81427703-81430872
A_21_P0009773	-4.19086	-2.06725	down	0.915349	0.820064	0.888984	-0.820064	-0.95873	-1.79855	lnc-BBC3-1	LNCipedia lincRNA (lnc-BBC3-1), lincRNA [lnc-BBC3-1:1]	AGACGGTTTTAGGTCTGCAGTCAACCAGCTCTATTTTGTCTCACCAGCACTTCACATCCG			lnc-BBC3-1:1	chr19:47742617-47742558
A_33_P3649472	-5.03918	-2.33319	down	1.08152	1.34315	1.01302	-1.22514	-1.01302	-1.32372	LOC283856	Homo sapiens uncharacterized LOC283856 (LOC283856), long non-coding RNA [NR_027078]	GTCTTCAAGTTCACTGATCTTTTCTTCTGCACTATCTAATCTGATCTTAGTCCTATCCAG	283856	NR_027078	uncharacterized LOC283856	chr16:56127040-56126981
A_24_P728006	-3.66561	-1.87406	down	0.761296	1.04624	1.16726	-0.778933	-0.761296	-1.10714	XLOC_l2_011874	BROAD Institute lincRNA (XLOC_l2_011874), lincRNA [TCONS_l2_00022670]	CCATTTTCAGTGTCTCAGCAAGAGGAATGCGGTAGGAGAGCAGGGTGTCAGCAAGAAAAC				chr5:177482509-177482568
A_33_P3333777	-3.77886	-1.91795	down	0.77862	0.936575	0.905858	-0.77862	-0.818934	-1.53525	GABPB1-AS1	Homo sapiens GABPB1 antisense RNA 1 (GABPB1-AS1), long non-coding RNA [NR_024490]	TAAGAAGGTGAAGTGCACTGGAAGCCATTGAAGGATTTAAGAAATGGAGTATCTGGCCGG	100129387	NR_024490	GABPB1 antisense RNA 1	chr15:50650157-50650216
A_33_P3255499	-3.32548	-1.73356	down	1.11851	0.938832	0.669698	-0.867043	-0.936904	-0.669698	SLC25A51	Homo sapiens solute carrier family 25, member 51 (SLC25A51), transcript variant 2, non-coding RNA [NR_024872]	TTGAGTCCAGGAGTTTGAGAGTTCAAGTCCAGCCTAGGCAATATAGTAAGACCTTGTCTC	92014	NR_024872	solute carrier family 25, member 51	chr9:37877631-37877572
A_21_P0013193	-4.23348	-2.08184	down	0.918044	0.938088	0.854333	-1.05151	-0.854333	-1.62922	LINC00174	Homo sapiens long intergenic non-protein coding RNA 174 (LINC00174), long non-coding RNA [NR_026873]	AGTGACCTCACAATGACTCAAGCTACCACTTACTGTTGATTGTGATGACATGCCAGCTGA	285908	NR_026873	long intergenic non-protein coding RNA 174	chr7:65844988-65844930
A_33_P3387272	-3.19764	-1.67701	down	0.680107	0.756826	0.664071	-1.20392	-1.06203	-0.664071	EEF1A1	Homo sapiens eukaryotic translation elongation factor 1 alpha 1 (EEF1A1), mRNA [NM_001402]	AACCATTGAAAAATTTGAGAAGGAGGCTGCTGAGATGGGAAAGGGCTCCTTCAAGTATGC	1915	NM_001402	eukaryotic translation elongation factor 1 alpha 1	chr6:74229639-74229214
A_23_P372478	-5.96281	-2.57599	down	1.15084	1.13953	1.17628	-1.13953	-1.29833	-1.82346	SERPINA9	Homo sapiens serpin peptidase inhibitor, clade A (alpha-1 antiproteinase, antitrypsin), member 9 (SERPINA9), transcript variant 1, mRNA [NM_175739]	ACTCCAGAAAAGGTGGATAGAGGTGTTCATCCCCAGATTTTCCATTTCTGCCTCCTACAA	327657	NM_175739	serpin peptidase inhibitor, clade A (alpha-1 antiproteinase, antitrypsin), member 9	chr14:94933457-94931144
A_33_P3410836	-5.87568	-2.55476	down	1.22785	1.25387	1.15972	-1.37648	-1.15972	-1.48664	HIST1H4D	Homo sapiens histone cluster 1, H4d (HIST1H4D), mRNA [NM_003539]	TCACAGCCATGGACGTGGTGTACGCGCTCAAGCGCCAGGGACGCACTCTTTATGGCTTCG	8360	NM_003539	histone cluster 1, H4d	chr6:26189060-26189001
A_21_P0001374	-3.03191	-1.60022	down	0.682522	0.785022	0.773468	-0.708403	-0.682522	-1.16874	NBPF15	neuroblastoma breakpoint family, member 15 [Source:HGNC Symbol;Acc:HGNC:28791] [ENST00000584793]	CACTGAATCACCTCATGACTAGCGGGGCAGGCCTCTAATTCACCGCAGGATTTCCGACAA	284565	XR_426769	neuroblastoma breakpoint family, member 15	chr1:148556755-148558169
A_33_P3394933	-3.39483	-1.76334	down	1.10199	0.588894	0.726951	-1.1774	-0.588894	-1.10589	P4HA2	Homo sapiens prolyl 4-hydroxylase, alpha polypeptide II (P4HA2), transcript variant 2, mRNA [NM_001017973]	ATGAGACTTCAGGACACATACAGGCTGGACCCAGGCACAATTTCCAGAGGGGAACTTCCA	8974	NM_001017973	prolyl 4-hydroxylase, alpha polypeptide II	chr5:131549669-131549610
A_21_P0010673	-12.0954	-3.59639	down	1.5873	2.50159	1.33607	-2.31787	-1.33607	-1.71025	LOC101928976		TAGGATACATACTGTTGCATAGCCTTGAAAATAATAATTTTTAATTGAGTGGAATAATAA	101928976		uncharacterized LOC101928976	chr1:222652610-222652551
A_21_P0008248	-3.6837	-1.88115	down	0.828441	0.785475	0.803002	-0.897695	-0.785475	-1.54337		long intergenic non-protein coding RNA 426 [Source:HGNC Symbol;Acc:HGNC:42761] [ENST00000420210]	CAGTGCTAGGAGACTCATAAGTTGGAGAGAAACGGCCTGATTTATAGAAACTGAGCGAGA				chr13:30915727-30915668
A_24_P360529	-5.76717	-2.52786	down	1.15185	1.09808	1.21451	-1.09808	-1.46723	-1.55384	PDE7A	Homo sapiens cAMP-specific cyclic nucleotide phosphodiesterase PDE7A3 mRNA, complete cds. [AF332652]	TTCAGAAAGATGAAGTTTCCAGAAACTAAGAAGGTAGCACAATATGTGGCATCATACTCA	5150	AF332652	phosphodiesterase 7A	chr8:66634719-66634660
A_23_P88222	-7.55964	-2.91832	down	1.24102	1.3394	1.4314	-1.24102	-1.34199	-2.16012	PLD4	Homo sapiens phospholipase D family, member 4 (PLD4), mRNA [NM_138790]	TGAAAGTCTTCATCGTGCCGGTGGGGAACCATTCCAACATCCCATTCAGCAGGGTGAACC	122618	NM_138790	phospholipase D family, member 4	chr14:105398513-105398653
A_24_P136551	-4.48751	-2.16592	down	0.87353	0.703961	0.987624	-0.703961	-1.51001	-1.71866	NPLOC4	nuclear protein localization 4 homolog (S. cerevisiae) [Source:HGNC Symbol;Acc:HGNC:18261] [ENST00000374747]	ACAAAGATCAGCTCAGGATGGGTCATAGGCCTAATGGTAAAAGGTAAAACTGTGAGGCAG	55666	AB040932	nuclear protein localization 4 homolog (S. cerevisiae)	chr17:79528982-79528932
A_33_P3356031	-6.25839	-2.64579	down	1.40475	1.45989	0.848803	-0.848803	-1.36686	-2.00827	SMG7	SMG7 nonsense mediated mRNA decay factor [Source:HGNC Symbol;Acc:HGNC:16792] [ENST00000367538]	GAAGTCCCTGTAAGATCAAGAATTTCACCGAGACTTTAAAACAGTTTGGTTCGTTATTTA	9887		SMG7 nonsense mediated mRNA decay factor	chr1:183485149-183485208
A_33_P3253394	-6.71405	-2.74718	down	1.54447	1.07283	1.46183	-1.07283	-1.21107	-1.87851	LAIR1	Homo sapiens leukocyte-associated immunoglobulin-like receptor 1 (LAIR1), transcript variant a, mRNA [NM_002287]	GGGGCAGTTGCTAATTTAGTTCTAGGCAAACGTGGACACATTAAATTCTCCTACAAACCC	3903	NM_002287	leukocyte-associated immunoglobulin-like receptor 1	chr19:54865294-54865235
A_24_P306469	-3.24708	-1.69914	down	1.1032	0.986453	0.719463	-0.719463	-0.831132	-0.737723			AGAGAAAACAGAGACAATTATGTTCCCGAGATCTCAGTCCTGGATCAGGAGACCGTTGAA				chr3:143574757-143574698
A_24_P316234	-3.88423	-1.95763	down	0.77036	0.78505	1.18694	-0.77036	-1.04465	-1.31553		Homo sapiens mRNA for FLJ00409 protein. [AK090485]	AAAGCTAAGTAGTAAGATTTTCTTGAGAGTGAATCATTGTCAGCTGACTTAACCTTTGTC		AK090485		chr10:22843154-22843095
A_24_P884376	-3.07297	-1.61964	down	0.691405	0.893694	0.895632	-0.838202	-0.848567	-0.691405			TAATTTGTTTATCTTTTGTGTATAAATCCCAAAATATGGAATTTTGGAATATTGCTACCA				chr7:45854779-45854838
A_21_P0000153	-4.09773	-2.03483	down	1.14399	0.763786	1.04975	-0.763786	-0.862494	-1.52067	NR3C1	Homo sapiens nuclear receptor subfamily 3, group C, member 1 (glucocorticoid receptor) (NR3C1), transcript variant 8, mRNA [NM_001204265]	CATAGCTTTGATTGATACCATGAAGGTATAATTCAGTGCCTGGATACTAACAACTTTACT	2908	NM_001204265	nuclear receptor subfamily 3, group C, member 1 (glucocorticoid receptor)	chr5:142673510-142673451
A_24_P366777	-4.35865	-2.12388	down	1.10738	1.04899	0.887028	-0.887028	-0.892216	-1.549		notch 2 N-terminal like [Source:HGNC Symbol;Acc:HGNC:31862] [ENST00000579793]	ATACTGTTAAAGCAAGGTTTCAGACACTTCTGAATTTTGGTCCCAGTACTCTAGAAGGGC		AK075065		chr1:145291283-145291342
A_21_P0014054	-5.56337	-2.47596	down	1.12703	0.991947	1.03296	-0.991947	-1.40613	-1.87787		PREDICTED: Homo sapiens uncharacterized LOC645177 (LOC645177), mRNA [XM_928212]	CTGAACATCTTGGGAAACCACAAAGAGTCTCTTGATAAAGAATTTGCCAAATTAATAGAG		XM_928212		chr12:25190956-25191015
A_33_P3379268	-3.00655	-1.58811	down	0.728522	0.707027	0.705401	-0.705401	-0.800106	-1.11787	SCIMP	Homo sapiens SLP adaptor and CSK interacting membrane protein (SCIMP), transcript variant 1, mRNA [NM_207103]	AGAAATGGGAAATTGCCAAGCCCCTGAAACACAAGCAAGTAGATGAAGAAAAGATGTATG	388325	NM_207103	SLP adaptor and CSK interacting membrane protein	chr17:5124642-5124583
A_33_P3345812	-3.34097	-1.74027	down	0.830798	0.70892	0.755388	-0.760661	-0.70892	-1.45612	GPER1	Homo sapiens G protein-coupled estrogen receptor 1 (GPER1), transcript variant 3, mRNA [NM_001039966]	GGAAACCTCACGACTGGTCACCTTGCACTCCTCACACAGAATTGCTACAATCCCAAAGCG	2852	NM_001039966	G protein-coupled estrogen receptor 1	chr7:1132661-1132720
A_33_P3245243	-3.37295	-1.75401	down	1.03632	0.715895	0.721468	-0.807833	-1.26462	-0.715895		Q9P1R7_HUMAN (Q9P1R7) HDCMB45P (Fragment), partial (19%) [THC2780703]	GGCATAACTTGGAGATATTGCAGGTTCCGTTCCAGACTATAGCAATAAAATGTATATTGC				chr1:118341406-118341465
A_33_P3419785	-7.16576	-2.84112	down	1.49579	1.28874	1.22268	-1.24049	-1.22268	-2.05297	BNIP3	Homo sapiens BCL2/adenovirus E1B 19kDa interacting protein 3 (BNIP3), mRNA [NM_004052]	GGCCACGTCACTTGTGTTTATTTGTTCTGTAAATGCTGCGTTCCTAATTTAGTAAAATAA	664	NM_004052	BCL2/adenovirus E1B 19kDa interacting protein 3	chr10:133781940-133781881
A_24_P71938	-3.67456	-1.87757	down	0.964482	0.769618	0.742162	-0.742162	-0.840717	-1.57357	SMAD1	Homo sapiens SMAD family member 1 (SMAD1), transcript variant 1, mRNA [NM_005900]	TGTATTCACTTATGCTCTCGTACATTGAGTACTTTTATTCCAAAACTAGTGGGTTTTCTC	4086	NM_005900	SMAD family member 1	chr4:146480219-146480278
A_33_P3374952	-3.39619	-1.76392	down	1.20018	1.03139	0.749059	-0.784207	-0.777846	-0.749059	KLF17	Homo sapiens Kruppel-like factor 17 (KLF17), mRNA [NM_173484]	TAAAAATCCTTAGGATAACTTGAGGCCAGGAGTTTGAGACCAGTGTGACCTTGTCTCTGT	128209	NM_173484	Kruppel-like factor 17	chr1:44600730-44600789
A_33_P3374893	-34.9711	-5.12809	down	2.40868	2.29716	2.35377	-2.75493	-3.27258	-2.29716	LINC00487	Homo sapiens long intergenic non-protein coding RNA 487 (LINC00487), long non-coding RNA [NR_038369]	TGACCTAACTCAGGGGTCAGCAAATAACACTCTGTGCGCAAAATCTGACTACGATCTGTT	400941	NR_038369	long intergenic non-protein coding RNA 487	chr2:6869391-6869332
A_21_P0010950	-3.35054	-1.74439	down	0.771684	0.739642	0.735239	-0.813524	-0.735239	-1.43785	lnc-SFTPD-2	LNCipedia lincRNA (lnc-SFTPD-2), lincRNA [lnc-SFTPD-2:9]	CAGACAAGACACTTTTCAGAAAGACAGGTAAGTCATTTGTTAAAATCTCACTACTGTTGT			lnc-SFTPD-2:9	chr10:81564267-81564208
A_21_P0003208	-3.29525	-1.72039	down	0.854942	0.730912	0.797601	-0.730912	-0.79906	-1.24774	lnc-KIAA0226-3	LNCipedia lincRNA (lnc-KIAA0226-3), lincRNA [lnc-KIAA0226-3:1]	TAGTTGAGGGTTGTGGTATTTCCAGGGTTTCACAAAGGCCAGATTTTATTTCAGTTACTG			lnc-KIAA0226-3:1	chr3:197363397-197363338
A_21_P0000542	-3.4949	-1.80525	down	0.779789	0.774691	0.804396	-0.774691	-1.03232	-1.24986	CMAHP	Homo sapiens cytidine monophospho-N-acetylneuraminic acid hydroxylase, pseudogene (CMAHP), transcript variant 2, non-coding RNA [NR_027626]	GGAAGTGTGTATCCTCAACACTAGTATTGTAAGTGCTCAATACATGTCCACTTAATAAAT	8418	NR_027626	cytidine monophospho-N-acetylneuraminic acid hydroxylase, pseudogene	chr6:25108279-25108220
A_33_P3348194	-3.1166	-1.63997	down	0.965455	0.582796	1.10216	-0.582796	-0.971557	-0.715152			GCCACATTGAAGGGACTATCTATCCAAATTTTAAGAGTCTATTATGGCATATTAAGGAGA				chr6:082897078-082897019
A_33_P3403053	-6.25237	-2.6444	down	1.50028	1.04255	1.15472	-1.04255	-1.44059	-1.75252	lnc-GUSB-5	Homo sapiens hypothetical LOC441242, mRNA (cDNA clone MGC:87648 IMAGE:5267764), complete cds. [BC066990]	GTGTTAACGACCACACATTTTACACAAATGCCATGAATCCTTAAGGTGTTCCAATTTATA		BC066990	lnc-GUSB-5:1	chr7:64600902-64600843
A_23_P397320	-5.81698	-2.54027	down	1.22782	1.16542	1.24941	-1.36863	-1.16542	-1.44412	JSRP1	Homo sapiens junctional sarcoplasmic reticulum protein 1 (JSRP1), mRNA [NM_144616]	GAGAGGCCTCGGAGAGAGGGGAAGCCGCGGAAGGAGAAGCCGCGGAAGGAGGAGAGACCT	126306	NM_144616	junctional sarcoplasmic reticulum protein 1	chr19:2252615-2252556
A_19_P00317704	-6.46802	-2.69333	down	1.12684	1.2869	1.35446	-1.12684	-1.39937	-1.78556	LOC100507006	PREDICTED: Homo sapiens uncharacterized LOC100507006 (AC074289.1), transcript variant X3, ncRNA [XR_425407]	ATCTCAGGACAATGTTTTCTCAGATGCTCTTCCAGAAAGAAAAGCCAGGAGTACTCCTGG	100507006	XR_425407	uncharacterized LOC100507006	chr2:64478800-64478859
A_23_P7503	-3.79017	-1.92226	down	1.35043	0.814507	0.763864	-1.00895	-0.763864	-1.06516	TIMD4	Homo sapiens T-cell immunoglobulin and mucin domain containing 4 (TIMD4), transcript variant 1, mRNA [NM_138379]	TTAGATTGAGGATGGGGGCATGACACTCCAGTGTCAAAATAAGTCTTAGTAGATTTCCTT	91937	NM_138379	T-cell immunoglobulin and mucin domain containing 4	chr5:156346452-156346393
A_33_P3377005	-3.08402	-1.62481	down	1.02017	0.622745	0.704258	-0.622745	-0.707828	-1.19669	LMNTD2	Homo sapiens lamin tail domain containing 2 (LMNTD2), mRNA [NM_173573]	CTGTGTCCGCTGCATCATTTATTGAACCAACGTGGCCTACAAAGTAAACCGCATTTCTGT	256329	NM_173573	lamin tail domain containing 2	chr11:554917-554858
A_23_P59069	-3.10115	-1.6328	down	0.789483	0.894437	0.733293	-0.737831	-0.733293	-1.01008	HIST1H2BO	Homo sapiens histone cluster 1, H2bo (HIST1H2BO), mRNA [NM_003527]	AAAGGCCGTCACCAAGTACACCAGCTCCAAGTGAGCTCTCGCAGCTGCCAGCAATCCAAA	8348	NM_003527	histone cluster 1, H2bo	chr6:27861588-27861647
A_24_P826348	-4.1586	-2.0561	down	0.9998	0.881465	0.838749	-0.838749	-0.968984	-1.64055	ZC3H6	Homo sapiens zinc finger CCCH-type containing 6 (ZC3H6), mRNA [NM_198581]	CAAGGGGGTATACTTTGCTGAACTGATAAATTATTCTATTAAGGACTAACCCAGTACTTG	376940	NM_198581	zinc finger CCCH-type containing 6	chr2:113097441-113097500
A_23_P93282	-4.19065	-2.06717	down	0.985742	0.848409	0.744073	-1.50918	-1.37004	-0.744073	HIST1H3J	Homo sapiens histone cluster 1, H3j (HIST1H3J), mRNA [NM_003535]	TCTCTTTGAAGACACCAACCTCTGTGCTATTCACGCCAAGCGTGTCACTATTATGCCTAA	8356	NM_003535	histone cluster 1, H3j	chr6:27858262-27858203
A_21_P0012440	-3.78581	-1.9206	down	0.744366	0.744341	0.928423	-1.02947	-0.744341	-1.57087	TRANK1	Homo sapiens tetratricopeptide repeat and ankyrin repeat containing 1 (TRANK1), mRNA [NM_014831]	ATTTTTCAGCCTTGGGAAGTGGAATGAGGCATTTGTTGCTGCCAAGGAATGTCTCCAATG	9881		tetratricopeptide repeat and ankyrin repeat containing 1	chr3:36944718-36944659
A_21_P0010520	-3.66467	-1.87368	down	0.979985	0.87164	0.966411	-1.04459	-0.87164	-0.886776		macrophage stimulating 1-like [Source:HGNC Symbol;Acc:HGNC:7390] [ENST00000544155]	TAACAAGTGAGCCTTGGGGCAACGGACTGAGAGTCACAAATGACCTAGCAGAGCTTCTCT		XM_006713169		chr1:17084648-17084589
A_21_P0010515	-3.58905	-1.8436	down	0.0636466	-0.0636466	0.0670245	-2.01168	-1.63084		MST1	Homo sapiens macrophage stimulating 1 (hepatocyte growth factor-like) (MST1), mRNA [NM_020998]	AGAAAAATACGCGTGCAAAGACCTTCGGGAGAACTTCTGCCGGAACCCCGACGGCTCAGA	4485	NM_020998	macrophage stimulating 1 (hepatocyte growth factor-like)	chr3:49723763-49723584
A_33_P3354604	-4.33672	-2.11661	down	0.958345	0.85322	0.91484	-1.14775	-0.85322	-1.62244	CCL4L2	Homo sapiens chemokine (C-C motif) ligand 4-like 2 (CCL4L2), transcript variant CCL4L2b2, mRNA [NM_001291470]	ATCCAGTGAGTGGAAGTTACAGGGAGTCTGCTTCCAGTGCTGCTCCGGGAAGGATCCCAT	9560	NM_001291470	chemokine (C-C motif) ligand 4-like 2	chr17:34539699-34539758
A_33_P3223964	-3.93346	-1.9758	down	0.972387	0.89265	0.885103	-0.885103	-1.07608	-1.21607		immunoglobulin heavy variable 1-24 [Source:HGNC Symbol;Acc:HGNC:5551] [ENST00000390610]	TGATCCTGAAGATGGTGAAACAATATATGCACAGAAGTTCCAGGGCAGAGTCACCATGAC		AF533986		chr2:95619045-95618986
A_23_P161507	-3.50252	-1.80839	down	1.04366	0.984959	0.5956	-0.5956	-0.875182	-1.33018	MTL5	Homo sapiens metallothionein-like 5, testis-specific (tesmin) (MTL5), transcript variant 1, mRNA [NM_004923]	ACATAACTAGCTTGTGGAAACCAGCAGGTAAAATGAATTCTTAAGTTGACGCTTTTGGTT	9633	NM_004923	metallothionein-like 5, testis-specific (tesmin)	chr11:68475010-68474951
A_24_P160413	-3.09576	-1.63029	down	0.665618	1.01737	0.828503	-0.779793	-0.665618	-0.933978	MTMR9LP	Homo sapiens myotubularin related protein 9-like, pseudogene (MTMR9LP), non-coding RNA [NR_026850]	CAAAAGTACTGAGGGTCTTAAGTTTGAAGTGTCCAAAGTATAGGGAGGTCTCAATAATAA	339483	NR_026850	myotubularin related protein 9-like, pseudogene	chr1:32697338-32697279
A_33_P3356290	-3.14843	-1.65463	down	0.798509	0.653214	0.766291	-0.653214	-0.799192	-1.29348	CADPS	Homo sapiens Ca++-dependent secretion activator (CADPS), transcript variant 3, mRNA [NM_183393]	AATCGCATCGTATATTGCACAATGGAGGTGGAAGGAGGAGAGAAACTACAGACTGATCAG	8618	NM_183393	Ca++-dependent secretion activator	chr3:62631476-62631417
A_21_P0005565	-3.34725	-1.74298	down	0.964454	0.575569	0.807935	-1.01527	-0.575569	-1.29013	lnc-VKORC1L1-1	DB461521 RIKEN full-length enriched human cDNA library, testis Homo sapiens cDNA clone H013094H15 5', mRNA sequence [DB461521]	TAAAGATGACTCTGAAGAATGGCATGGGATGGATCCTTTTGAATGCACTCAAGCAGGGGT			lnc-VKORC1L1-1:1	chr7:65292642-65292701
A_33_P3231414	-3.95037	-1.98199	down	0.99704	0.901209	0.887603	-0.906563	-0.887603	-1.36595	LILRB1	Homo sapiens leukocyte immunoglobulin-like receptor, subfamily B (with TM and ITIM domains), member 1 (LILRB1), transcript variant 1, mRNA [NM_006669]	GGGAACTTTTAGGGGTCACTCAATTCTGCAGTATAAATAACTAATGTCTCTACAATTTTG	10859	NM_006669	leukocyte immunoglobulin-like receptor, subfamily B (with TM and ITIM domains), member 1	chr19:55148442-55148501
A_21_P0013323	-3.06955	-1.61803	down	0.842352	0.640385	0.935281	-1.11851	-0.640385	-0.677171	LOC101929463	PREDICTED: Homo sapiens uncharacterized LOC101929463 (LOC101929463), transcript variant X2, ncRNA [XR_426202]	GCTCTGCTCTTATAAGGATCCAGAGAAATGGAATAATCTTATTGCTGATCTATGTAAACA	101929463	XR_426202	uncharacterized LOC101929463	chr7:65956040-65955058
A_23_P6596	-6.3021	-2.65583	down	1.0644	1.28853	1.27678	-1.0644	-1.29443	-1.97896	HES1	Homo sapiens hes family bHLH transcription factor 1 (HES1), mRNA [NM_005524]	AGTCATCAAAGCCTATTATGGAGAAAAGACGAAGAGCAAGAATAAATGAAAGTCTGAGCC	3280	NM_005524	hes family bHLH transcription factor 1	chr3:193854276-193854463
A_21_P0012474	-3.22296	-1.68838	down	0.687906	1.03107	0.936742	-0.69123	-1.0303	-0.687906		HESC4_78_A05.g1_A037 NIH_MGC_262 Homo sapiens cDNA clone IMAGE:7487892 5', mRNA sequence [CX873203]	CAGCAAGTGACTATCGCTGTTGCCTTAGGCCACAGAGACTTTATCAAAAACGTGATTACA				chr3:193296954-193296895
A_24_P20630	-4.16415	-2.05802	down	1.12505	1.25937	0.681855	-1.07189	-0.681855	-1.35405	LEF1	Homo sapiens lymphoid enhancer-binding factor 1 (LEF1), transcript variant 1, mRNA [NM_016269]	GCCCAAAACTGTCATCCTAACGTTTGTCATTCCAGTTTGAGTTAATGTGCTGAGCATTTT	51176	NM_016269	lymphoid enhancer-binding factor 1	chr4:108968805-108968746
A_21_P0013770	-3.78903	-1.92183	down	1.1795	1.06958	0.689323	-1.10936	-1.02839	-0.689322	XLOC_l2_015561	BROAD Institute lincRNA (XLOC_l2_015561), lincRNA [TCONS_l2_00030251]	CAGTTGTGAGAAAATTGAAGGGGAAACGGAGAATGTCAGTGTTAAAGATATTTGAACTTT				chrX:73169509-73169568
A_23_P30363	-6.19002	-2.62994	down	1.06943	1.09196	1.36162	-1.31775	-1.06943	-1.97965	P4HA2	Homo sapiens prolyl 4-hydroxylase, alpha polypeptide II (P4HA2), transcript variant 1, mRNA [NM_004199]	TTTATGGCATTTCTATCTATTGTGGCTTTACCAAAAAATAAAATGTCCCTACCAGAAGCC	8974	NM_004199	prolyl 4-hydroxylase, alpha polypeptide II	chr5:131528367-131528308
A_33_P3397473	-4.63993	-2.2141	down	1.26782	0.950012	0.975683	-0.950012	-1.39552	-1.10326			TCTGAAGACATGGTCATGTATTACTGTGTGAGAGACACAGTGCAAAAACCCACATCCTGA				chr16:033768156-033768097
A_21_P0014694	-4.63031	-2.21111	down	0.873343	0.907565	0.899968	-1.4705	-0.873343	-1.60861	LOC101929910	PREDICTED: Homo sapiens nuclear pore complex-interacting protein family member B4-like (LOC101929910), misc_RNA [XR_433240]	TTTGCACTAATGTTTCAGACACAGTTAGAGGTTTCCAAGAGATTTTGCGCTGGGGAGGCT	101929910	XR_433240	nuclear pore complex-interacting protein family member B4-like	chr16:30258252-30258193
A_21_P0013343	-5.50188	-2.45992	down	1.14394	0.985057	1.08698	-0.985057	-1.12063	-2.05811	XLOC_l2_013931	BROAD Institute lincRNA (XLOC_l2_013931), lincRNA [TCONS_l2_00026784]	AGCTAAGATGAAATGTTTCTATTCATGATGTGCTTCTGTTTCCTCATGTTTCAGGAGGAA				chr7:97600096-97600037
A_21_P0006672	-3.12311	-1.64298	down	0.62438	1.25448	0.903868	-0.76132	-0.624379	-0.760514	lnc-ZNF37A-3	Q96CB5_HUMAN (Q96CB5) C8orf44 protein, partial (23%) [THC2579940]	AATTAAGCATGAATAACACACACTCCCTAATCTCCATCCATTCATGGGAGGAGCACCTCA			lnc-ZNF37A-3:2	chr10:38724603-38724662
A_33_P3474859	-3.00018	-1.58505	down	0.86917	0.590114	0.57399	-0.57399	-0.864153	-1.28373	lnc-RP11-195B21.3.1-2	Homo sapiens cDNA clone IMAGE:5498355. [BC110369]	CTGTTAATAGCATGGTTTACTGAATATTTTAATCCCACTATTGAGACCTACTGCTCAGAA		BC110369	lnc-RP11-195B21.3.1-2:1	chr9:68414554-68414613
A_33_P3390939	-5.84622	-2.5475	down	1.24871	1.47091	0.948932	-1.36666	-0.948932	-1.65838			ATGGACATGCATGACACTTGGTGCCAAAACCCAGGACAGGGGGACTCCTTCTGGAGACCT				chr1:222121576-222121635
A_33_P3338539	-7.4455	-2.89637	down	1.34754	1.33593	1.18441	-2.08463	-1.18441	-1.55219			CTTGGCTGTAAGATTATACACATCCCCACATTGCAACTGGGAGGAAGAAATATAGAGAGC				chr2:098167578-098167519
A_23_P166823	-3.46647	-1.79347	down	0.685915	0.679777	0.678107	-1.12957	-0.678107	-1.52893	TNNC1	Homo sapiens troponin C type 1 (slow) (TNNC1), mRNA [NM_003280]	CAGCGGCACGGTGGACTTTGATGAGTTCCTGGTCATGATGGTTCGGTGCATGAAGGACGA	7134	NM_003280	troponin C type 1 (slow)	chr3:52485873-52485814
A_24_P85775	-3.00544	-1.58758	down	0.649239	0.788875	0.694249	-0.649239	-0.699503	-1.28162	THEMIS2	Homo sapiens thymocyte selection associated family member 2 (THEMIS2), transcript variant 2, mRNA [NM_001039477]	TGCTTCTCAGGGAATCCGACACCAGCCAACCATTTTAAGCCTCTAAAAGACCTCGGGCAA	9473	NM_001039477	thymocyte selection associated family member 2	chr1:28212463-28212522
A_33_P3544880	-3.80785	-1.92898	down	0.973562	0.744687	0.926383	-0.744687	-0.853356	-1.54425	LOC142937	Homo sapiens cDNA clone IMAGE:3454038. [BC008131]	ATTAAGTGACTTATCCAAGACCACAGGGCTTGCAAATGGCAAGTGGGAGGATTGTTTGAG	142937	BC008131	uncharacterized protein BC008131	chr10:6214512-6214571
A_33_P3324552	-3.29895	-1.72201	down	0.707102	0.954866	0.754602	-0.852551	-1.18979	-0.707102			ACTCATTTTTTATTGGCGGGGTGGGGGGCTCTGTTAACATCTAGCCTAAGTATAGAACTG				chr17:020690483-020690542
A_21_P0000494	-5.31223	-2.40932	down	0.964492	0.96438	1.35896	-1.97902	-0.99672	-0.96438	SNORA16B	Homo sapiens small nucleolar RNA, H/ACA box 16B (SNORA16B), small nucleolar RNA [NR_004389]	CTTGATGGTCATAGTTCTGTTTGCTGTAACTGATCTGCAAGATTTTGGGAAAATACCATT	692157	NR_004389	small nucleolar RNA, H/ACA box 16B	chr1:212526233-212526292
A_33_P3363537	-7.14617	-2.83717	down	1.26735	1.27357	1.27791	-1.61066	-1.26735	-1.81467		xx34g04.x1 NCI_CGAP_Ut1 Homo sapiens cDNA clone IMAGE:2839446 3', mRNA sequence [AW571659]	GTTACACTGTCATAATAAATAGCCACAAAGCAAAACCCCAAAAGACATCCAAATCAGAAT		AW571659		chr7_gl000195_random:59862-59803
A_19_P00320478	-4.76633	-2.25288	down	0.82296	1.15698	1.18866	-1.79603	-0.971036	-0.82296			GTGAAGATTTTACAGGTAACACTTCCTTTCCTTCCTTTGTTTTGATAACAGATGGAGATA				chr6:79314254-79314195
A_24_P174503	-3.03871	-1.60346	down	1.12217	0.616604	0.892336	-0.616604	-0.70052	-0.862142	AMT	Homo sapiens aminomethyltransferase (AMT), transcript variant 1, mRNA [NM_000481]	TGAAGAAGAATGTGGCGATGGGTTATGTGCCCTGCGAGTACAGTCGTCCAGGGACAATGC	275	NM_000481	aminomethyltransferase	chr3:49455118-49455059
A_23_P320261	-6.26049	-2.64627	down	1.43054	1.34085	1.09805	-1.09805	-1.31842	-1.65291	DMKN	Homo sapiens dermokine (DMKN), transcript variant 1, mRNA [NM_001035516]	AGTTCTCCAGGAAGGAGGAGCTTCCTACTTTTGAGTTTCTCTGTGGAAATAAAACATGAA	93099	NM_001035516	dermokine	chr19:35988194-35988135
A_33_P3327587	-3.42288	-1.77521	down	0.760574	0.947125	0.6376	-1.06839	-1.27434	-0.6376	LOC100127904	Homo sapiens cDNA clone IMAGE:30403562, partial cds. [BC065739]	TCTCGTGATAGTGAGTGAGTTCTCATCAGATCTGATTGCTTAGAAGTGTGTAGTGCTGGC	100127904	BC065739	uncharacterized LOC100127904	chr20:45380091-45380032
A_23_P147786	-3.63082	-1.8603	down	0.961772	0.727995	0.75518	-0.727995	-0.922034	-1.48592	RIMS2	Homo sapiens regulating synaptic membrane exocytosis 2 (RIMS2), transcript variant 2, mRNA [NM_014677]	GATGAACTAGAGCTATCCAATATGGTGATTGGATGGTTCAAACTTTTCCCACCTTCCTCC	9699	NM_014677	regulating synaptic membrane exocytosis 2	chr8:105263899-105263958
A_33_P3224803	-6.67495	-2.73876	down	1.25145	1.28702	1.28939	-1.65222	-1.48474	-1.25145	NCF1	Homo sapiens neutrophil cytosolic factor 1 (NCF1), mRNA [NM_000265]	ATGTTCCCTATTGAGGCAGGGGCGATCAATCCAGAGAACAGGATCATCCCCCACCTCCCA	653361	NM_000265	neutrophil cytosolic factor 1	chr7:74193443-74193502
A_21_P0007984	-4.212	-2.0745	down	0.987861	0.943044	1.04407	-1.04677	-0.943044	-1.25873		long intergenic non-protein coding RNA 426 [Source:HGNC Symbol;Acc:HGNC:42761] [ENST00000416261]	AGAGGGGCACTGTGGTGGCCACTTAAAATGCTCAGGCTATACCATGCACTAGAGCATCTA				chr13:30951028-30950969
A_33_P3331193	-4.03896	-2.01398	down	1.20588	0.9627	0.827394	-0.827394	-0.960099	-1.25848		immunoglobulin heavy variable 1-18 [Source:HGNC Symbol;Acc:HGNC:5549] [ENST00000390605]	AGGCCCCTGGACAAGGGCTTGAGTGGATGGGATGGATCAGCGCTTACAATGGTAACACAA		DQ926483		chr14:106641741-106641682
A_24_P188800	-4.65159	-2.21772	down	0.786745	1.18543	0.998335	-0.786745	-1.24706	-1.64885	2019-03-01	Homo sapiens membrane-associated ring finger (C3HC4) 1, E3 ubiquitin protein ligase (MARCH1), transcript variant 2, mRNA [NM_017923]	GTCACGCAAAAGATTTTCAGAAAATGTTCGGATATAATTAGCTCTGTTAAATACCCACAG	55016	NM_017923	membrane-associated ring finger (C3HC4) 1, E3 ubiquitin protein ligase	chr4:164449262-164449203
A_21_P0011470	-3.05758	-1.61239	down	0.616429	0.620001	0.79333	-1.05292	-0.616429	-1.13806	HERC2	Homo sapiens HECT and RLD domain containing E3 ubiquitin protein ligase 2 (HERC2), mRNA [NM_004667]	TATGAATGCTTCTGCTCAAGGTGCTTCTGCCACAGTTTTGGAAGCAACAAGGAAGGAAAC	8924	NM_004667	HECT and RLD domain containing E3 ubiquitin protein ligase 2	chr15:28467333-28467274
A_21_P0012289	-3.03977	-1.60396	down	0.848177	0.672509	0.834084	-0.672509	-0.679095	-1.10551	GGT1	Homo sapiens gamma-glutamyltransferase 1 (GGT1), transcript variant 6, mRNA [NM_001288833]	TGTCATCGAGCAGCAGCCTGTCTTGTGTGAGGTGTTCTGCCGGGATAGAAAGGTGCTTCG	2678	NM_001288833	gamma-glutamyltransferase 1	chr22:25016462-25016912
A_33_P3289246	-3.35237	-1.74518	down	1.01265	0.826888	0.675279	-1.05745	-0.987989	-0.675279		immunoglobulin heavy variable 3-43 [Source:HGNC Symbol;Acc:HGNC:5604] [ENST00000434710]	ATCTGCAAATGAACAGTCTGAGAGCTGAGGACACGGCCTTGTATTACTGTGCAAAAGATA		GQ232935		chr14:106926246-106926188
A_23_P25348	-3.28117	-1.71421	down	0.837694	0.703152	0.782637	-0.703152	-0.748335	-1.36766	ACAD10	Homo sapiens acyl-CoA dehydrogenase family, member 10 (ACAD10), transcript variant 2, mRNA [NM_025247]	CAGAGAGGAGGACAGCTTCTATGTCATAAACGGTCACAAATGGTGGATCACAGGCATCCT	80724	NM_025247	acyl-CoA dehydrogenase family, member 10	chr12:112185137-112186127
A_33_P3276308	-4.24942	-2.08727	down	0.866895	0.812091	0.872825	-1.28724	-0.812091	-1.61066	FLJ44124	PREDICTED: Homo sapiens uncharacterized LOC641737 (FLJ44124), misc_RNA [XR_252152]	GCCTGGCATTGCCCGGGACGTGGGGCGTTTGTCCAGTATTATTCAAATGACCGGACATAA	641737	XR_252152	uncharacterized LOC641737	chr7:884043-884102
A_21_P0007895	-5.72604	-2.51754	down	0.36455	0.111312	-0.111312	-2.55277	-2.23927		VSIG10	V-set and immunoglobulin domain containing 10 [Source:HGNC Symbol;Acc:HGNC:26078] [ENST00000539956]	AATGAAAATGAAGGGCGCCCTGGAATAGGTTCGCCGAAGAGAGAGCTTGCAGGCCTCTGG	54621		V-set and immunoglobulin domain containing 10	chr12:118573706-118564461
A_33_P3294177	-6.95381	-2.7978	down	1.26652	1.01866	1.41931	-1.42968	-1.01866	-2.2406	LOC100131043	Homo sapiens cDNA FLJ42228 fis, clone THYMU2041252. [AK124222]	ATCAGATACAGCTGGAAACAAGACAGACCCAAATCCCTGGTGCTTATATTCTAGTGGGAG	100131043	AK124222	uncharacterized LOC100131043	chr6:36723389-36723330
A_33_P3420011	-4.69493	-2.2311	down	1.19135	1.00205	0.853566	-1.20395	-1.58882	-0.853566			CACTCAAGGCTGCAAGAACAACGTTAATGTGGTAAATACTCCACGGTCTAACCTGAAGAA				chr16:72038313-72038254
A_23_P36753	-7.63082	-2.93184	down	1.23125	1.30065	1.2617	-1.23125	-1.5987	-2.17197	ALDH2	Homo sapiens aldehyde dehydrogenase 2 family (mitochondrial) (ALDH2), transcript variant 1, mRNA [NM_000690]	AAATGATCCTTGCGTGCTGAATATCTGAAAAGAGAAATTTTTCCTACAAAATCTCTTGGG	217	NM_000690	aldehyde dehydrogenase 2 family (mitochondrial)	chr12:112247448-112247507
A_33_P3336822	-3.86075	-1.94888	down	0.91724	0.804946	1.02499	-0.804946	-1.01457	-1.27994		immunoglobulin lambda variable 1-44 [Source:HGNC Symbol;Acc:HGNC:5879] [ENST00000390297]	ATCTCTTGTTCTGGAAGCAGCTCCAACATCGGAAGTAATACTGTAAACTGGTACCAGCAG		U09907		chr22:22735478-22735537
A_33_P3889179	-4.84681	-2.27703	down	0.929956	1.10379	1.13394	-0.929956	-1.05542	-1.67804	LINC00698	Homo sapiens long intergenic non-protein coding RNA 698 (LINC00698), long non-coding RNA [NR_027104]	CCCTTTCCTTCCACGGTGTCTGTTCCAAGCACTTGCCTTAATAAACATGTAACAGGTTAA	285401	NR_027104	long intergenic non-protein coding RNA 698	chr3:63110678-63110737
A_21_P0010878	-3.98359	-1.99407	down	1.00042	0.72886	0.866787	-0.72886	-1.01801	-1.63926	XLOC_l2_001972	BROAD Institute lincRNA (XLOC_l2_001972), lincRNA [TCONS_l2_00003558]	CCCCGTGATGAAGGGAAGAGAGTTTTGTGATTATTAAAAGGATCATGGTCATTATCAGGG				chr10:49265366-49265307
A_23_P42746	-5.20106	-2.37881	down	1.10784	1.14426	1.15105	-1.27088	-1.10784	-1.35454	NCF1	Homo sapiens neutrophil cytosolic factor 1 (NCF1), mRNA [NM_000265]	TTCACAAGCTCCTGGACGGCTGGTGGGTCATCAGGAAAGACGACGTCACAGGCTACTTTC	653361	NM_000265	neutrophil cytosolic factor 1	chr7:74199612-74202353
A_33_P3211432	-5.43757	-2.44296	down	1.1158	1.16987	1.19963	-1.1158	-1.30034	-1.42745	NCF1	Homo sapiens neutrophil cytosolic factor 1 (NCF1), mRNA [NM_000265]	AGACGACGTCACAGGCTACTTCCCGTCCATGTACCTGCAAAAGTCAGGGCAAGACGTGTC	653361	NM_000265	neutrophil cytosolic factor 1	chr7:74202331-74202390
A_19_P00317023	-3.1541	-1.65723	down	0.746847	0.68277	0.803547	-0.92402	-0.68277	-1.13173	lnc-MYC-2	Homo sapiens cDNA FLJ26234 fis, clone ADG09627. [AK129745]	TGTCTAGAAATCAGCCTGGCTGGGACGCACACCAATAGGAGGGCATCCTCACCTTTCCCA			lnc-MYC-2:22	chr8:129004109-129004168
A_33_P3321801	-4.19312	-2.06802	down	0.926954	0.757726	1.02199	-1.31098	-0.757726	-1.4287	LOC100272216	Homo sapiens uncharacterized LOC100272216 (LOC100272216), long non-coding RNA [NR_027439]	TTGCAAGTGAGGACAAAGTGTGGGAAGGCCGTGAGTGTCTGCAGTGCCAGATGGCCTTGT	100272216		uncharacterized LOC100272216	chr5:69529617-69529558
A_33_P3424754	-3.6631	-1.87306	down	0.909228	1.02646	0.815229	-0.882175	-0.815229	-1.17087		immunoglobulin lambda variable 1-47 [Source:HGNC Symbol;Acc:HGNC:5880] [ENST00000390294]	TCCGGTCCGAGGATGAGGCTGATTATTACTGTGCAGCATGGGATGACAGCCTGAGTGGTC		KJ487209		chr22:22712550-22712608
A_24_P236091	-6.58718	-2.71966	down	1.17744	1.31731	1.47546	-1.20446	-1.17744	-1.80687	ENO2	Homo sapiens enolase 2 (gamma, neuronal) (ENO2), mRNA [NM_001975]	TTCATTCATCCCATTAATCATTTCCCCATAACTCAATGGCCTAAAACTGGCCTGACTTGG	2026	NM_001975	enolase 2 (gamma, neuronal)	chr12:7032482-7032541
A_21_P0014584	-5.23522	-2.38825	down	1.02241	1.03471	0.989029	-0.989029	-1.06815	-2.06143		Homo sapiens cDNA FLJ37304 fis, clone BRAMY2016070. [AK094623]	GGCTTTTAGGTTCTGTTGATGGGTGAGTTCCAGATATAGCTTTCTTTTGTAGGATATTTC		AK094623		chr5:278281-278340
A_23_P350895	-4.21804	-2.07657	down	0.843328	0.917979	1.01789	-0.843328	-0.860836	-1.74636		RAB GTPase activating protein 1 [Source:HGNC Symbol;Acc:HGNC:17155] [ENST00000317419]	AAATTGTCATATTGGGAACATGTTGCTACCTTCTTTTAGTCAGATACCAAGTGGCTAACT		AK022408		chr9:125752685-125752744
A_21_P0007936	-3.03576	-1.60206	down	0.729388	0.812796	0.674917	-0.674917	-0.720913	-1.19324	lnc-GTF2F2-2	LNCipedia lincRNA (lnc-GTF2F2-2), lincRNA [lnc-GTF2F2-2:14]	GAAAGTAACTTGAGGCAACTGCAGGAGGGCTGCATGGCGGGAAAGAAATTGCTGAAAACA			lnc-GTF2F2-2:14	chr13:45918916-45918975
A_33_P3263538	-5.5074	-2.46137	down	1.25144	1.10256	1.39212	-1.10256	-1.20838	-1.32705		nuclear paraspeckle assembly transcript 1 (non-protein coding) [Source:HGNC Symbol;Acc:HGNC:30815] [ENST00000501122]	CAAATATTTTCTCCCATTCTGTGGGTTGTGTTTTCACTTTATCGATAATGTCCTTAGACA		AF001893		chr11:65206777-65206836
A_21_P0014288	-3.55057	-1.82805	down	-0.0431259	0.0431259	0.0567229	-1.6367	-1.98159		ANKRD10-IT1	Homo sapiens cDNA FLJ42239 fis, clone TKIDN2002329. [AK124233]	CTGGCTTCAGAGTGGAGCCTAATTTTTAAAGTTCTTTAGGGGAGAATTCTTAGATATAAA	100505494	AK124233	ANKRD10 intronic transcript 1 (non-protein coding)	chr13:111552507-111552448
A_33_P3390107	-31.4138	-4.97333	down	2.3917	2.39007	2.00996	-3.52671	-2.59157	-2.00996	RNA18S5	Homo sapiens RNA, 18S ribosomal 5 (RNA18S5), ribosomal RNA [NR_003286]	CTATCTAGAGGAAGTAAAAGTCGTAACAAGGTTTCCGTAGGTGAACCTGCGGAAGGATCA	100008588	NR_003286	RNA, 18S ribosomal 5	chrUn_gl000220:154856-154915
A_21_P0008135	-8.4527	-3.07941	down	1.65326	1.29972	1.70785	-1.52758	-1.29972	-1.7501	lnc-KATNAL1-3	Q4HH67_CAMCO (Q4HH67) Multi-drug resistance protein, partial (6%) [THC2589652]	AAATGACAAAAAGCCTCGATAAGCGGATCACTCCTATCGTTATTCTTTCCATCCAGCCGC			lnc-KATNAL1-3:21	chr13:30937419-30937360
A_33_P3367830	-3.35231	-1.74516	down	0.71203	0.782941	0.709466	-0.817349	-0.709466	-1.50422	EFEMP2	Homo sapiens EGF containing fibulin-like extracellular matrix protein 2 (EFEMP2), transcript variant 1, mRNA [NM_016938]	TTTGGATAAGCCCTAGTAGTTCCCTGGGCCTGTTTTTCTATAAAACGAGGCAACTGGACT	30008	NM_016938	EGF containing fibulin-like extracellular matrix protein 2	chr11:65633975-65633916
A_24_P932416	-6.68647	-2.74125	down	1.47482	1.2516	1.10842	-1.95764	-1.10842	-1.32283	TMEM14E	Homo sapiens transmembrane protein 14E (TMEM14E), mRNA [NM_001123228]	GGGATCTTGCTAGGTATTATGCGAATAAGATTCTAACACTCTGGAACATTTACGCTTGTG	645843	NM_001123228	transmembrane protein 14E	chr3:152058482-152058423
A_33_P3354589	-5.12913	-2.35871	down	1.08862	0.933329	0.872611	-0.872611	-1.47501	-1.83396	CCL4L2	Homo sapiens chemokine (C-C motif) ligand 4-like 2 (CCL4L2), transcript variant CCL4L2b2, mRNA [NM_001291470]	CATGGACCATGGTCAGGCAGAGGAAGATGCCTACCACAGGCAAGGGATAAAGCCAGATGA	9560	NM_001291470	chemokine (C-C motif) ligand 4-like 2	chr17:34539776-34539835
A_21_P0007981	-8.76273	-3.13138	down	1.4049	1.34606	1.49935	-1.50914	-1.34606	-2.28863		long intergenic non-protein coding RNA 427 [Source:HGNC Symbol;Acc:HGNC:42762] [ENST00000412722]	TATTTTGGAGGACCTGAATTAGTCATGTGGGGTACTTGATTAAAAATCACTTGAACAGCC				chr13:30890556-30890497
A_24_P332816	-7.38555	-2.8847	down	1.28829	1.1843	1.26798	-1.37262	-1.1843	-2.35662	RIMS2	Homo sapiens regulating synaptic membrane exocytosis 2 (RIMS2), transcript variant 2, mRNA [NM_014677]	GAGGAAGTGTACAACATCATTCTAGAATCCAAACCTGAACCACAAGTAGAACTTGTAGTT	9699	NM_014677	regulating synaptic membrane exocytosis 2	chr8:104928692-104928751
A_21_P0009386	-3.86262	-1.94958	down	0.784371	0.891948	0.771278	-1.233	-0.771278	-1.39686	lnc-ATAD5-3	LNCipedia lincRNA (lnc-ATAD5-3), lincRNA [lnc-ATAD5-3:4]	GTGTGCTGTATTATACACCGTCTCCATAGTATTCATTGTTATGGCTAATCATCCATAGTT			lnc-ATAD5-3:4	chr17:29070139-29070198
A_24_P362904	-4.22661	-2.0795	down	0.865178	0.896715	0.896842	-0.865178	-1.07435	-1.64024	PFKFB4	Homo sapiens 6-phosphofructo-2-kinase/fructose-2,6-biphosphatase 4 (PFKFB4), mRNA [NM_004567]	GACACACTCATTTGTTAGCCATAGTGGGTTCCCTTGGTCAGCAACAGTGCATGTACCTCT	5210	NM_004567	6-phosphofructo-2-kinase/fructose-2,6-biphosphatase 4	chr3:48555513-48555454
A_24_P273180	-6.1453	-2.61948	down	1.19097	1.19374	1.24033	-1.25821	-1.19097	-1.78423	PRAMENP	PRAME N-terminal-like, pseudogene [Source:HGNC Symbol;Acc:HGNC:34302] [ENST00000548391]	GAGGTGTTTTACTGGTGTAGAGACTTCTTGGTATTGGCAGAGCCAAACCTATCTGCCATA	649179	XR_425303	PRAME N-terminal-like, pseudogene	chr22:22348779-22348720
A_19_P00319630	-4.66137	-2.22076	down	0.962051	0.99444	1.08552	-1.32088	-0.962051	-1.33733	lnc-SNURF-1	LNCipedia lincRNA (lnc-SNURF-1), lincRNA [lnc-SNURF-1:8]	TGAGGAAAGGAATGGATGGAAGGGGCCAGCTGAAAGAAAAAGTAACAACCTAATGATGGA			lnc-SNURF-1:8	chr15:25272900-25272959
A_21_P0008420	-6.24777	-2.64334	down	1.19875	1.06086	1.29578	-1.06086	-1.15843	-2.15533	lnc-RALGAPA1-3	LNCipedia lincRNA (lnc-RALGAPA1-3), lincRNA [lnc-RALGAPA1-3:1]	ACTGGTGATTTGTCTTGGGGTCTTAAATTAATTTTGAGCAGCTCTGCAAGCTGTGTCCCG			lnc-RALGAPA1-3:1	chr14:36516979-36516920
A_23_P126167	-3.60328	-1.84931	down	0.814123	0.834041	0.748234	-0.748234	-1.03571	-1.36759	KCNN3	Homo sapiens potassium channel, calcium activated intermediate/small conductance subfamily N alpha, member 3 (KCNN3), transcript variant 1, mRNA [NM_002249]	AGTGACCAAGCCAACACTCTGGTGGACCTTTCCAAGATGCAGAATGTCATGTATGACTTA	3782	NM_002249	potassium channel, calcium activated intermediate/small conductance subfamily N alpha, member 3	chr1:154685975-154680725
A_21_P0010684	-4.02024	-2.00728	down	0.819227	0.932949	0.927862	-1.1273	-0.819227	-1.39529		S72008 CDC10 homolog {Homo sapiens} (exp=-1; wgp=0; cg=0), partial (9%) [THC2551621]	TAGAGGTAAGATGCAAATTTGCCCTTAGCCAGTGTAAGATGGTAAATATGACTTCATAAA				chr1:717512-717571
A_23_P143374	-4.3835	-2.13208	down	1.16861	0.996711	0.832777	-0.832777	-1.23069	-1.33468	NINL	Homo sapiens ninein-like (NINL), mRNA [NM_025176]	ACTCAGGGATGATGGTGTTTATTGCAAATGCACAATCTTTTTCCCATTGAAATGTCATCA	22981	NM_025176	ninein-like	chr20:25433543-25433484
A_33_P3229122	-6.63619	-2.73036	down	1.02081	1.30547	1.52997	-1.74655	-1.02081	-1.56746	HIST1H2BF	Homo sapiens histone cluster 1, H2bf (HIST1H2BF), mRNA [NM_003522]	ACCAGCTCTAAGTAATTCTAACGTCTTCATACCCAATCCCAAAGGCTCTTTTAAGAGCCA	8343	NM_003522	histone cluster 1, H2bf	chr6:26200153-26200212
A_33_P3237634	-7.68693	-2.94241	down	1.45032	1.24491	1.33396	-1.24491	-1.74605	-1.80706	TSC22D3	Homo sapiens TSC22 domain family, member 3 (TSC22D3), transcript variant 2, mRNA [NM_004089]	CCTTATCCTGATGTATGGTTCCAGGATTTGGATTTTGATTTTCCAAATGTAGCTTGAAAT	1831	NM_004089	TSC22 domain family, member 3	chrX:106956545-106956486
A_32_P135336	-3.45665	-1.78938	down	0.869093	0.730026	0.773204	-0.730026	-0.775109	-1.49067	LOC388242	Homo sapiens coiled-coil domain containing 101 pseudogene (LOC388242), non-coding RNA [NR_002556]	CGGGCATTCACTCTTTCAGCTCAGAGTTTCTCTTCCTTTCCAATACAGGCTCTACATGAA	388242	NR_002556	coiled-coil domain containing 101 pseudogene	chr16:29476353-29476294
A_24_P237586	-3.25173	-1.70121	down	0.994204	0.661274	0.777882	-0.661274	-0.80118	-1.20781	ANKRD37	Homo sapiens ankyrin repeat domain 37 (ANKRD37), mRNA [NM_181726]	CTTCCAAGTGAAGATCCATTTAAGAACACATGTATTTACATGCCTATAATATGCTGGTTG	353322	NM_181726	ankyrin repeat domain 37	chr4:186321293-186321352
A_33_P3881056	-8.96386	-3.16412	down	1.79249	1.38121	1.50123	-1.38121	-1.45391	-1.98233	LOC100996405	PREDICTED: Homo sapiens uncharacterized LOC100996405 (LOC100996405), mRNA [XM_003846604]	GGAGAAAGACTGAAACGGAGATTTGCATGAGCTGGTTTGAGCATGTCACAAGACTTTGTC	100996405	XM_003846604	uncharacterized LOC100996405	chr19:7224336-7224280
A_23_P327370	-3.67539	-1.8779	down	0.925534	0.853941	0.78057	-0.78057	-0.992709	-1.30036	PGPEP1	Homo sapiens pyroglutamyl-peptidase I (PGPEP1), transcript variant 1, mRNA [NM_017712]	CCTGGGGGTTTTGTGTCGTGACACTTTGTCTCAAGGAGATTCCACATAGGGATTTGAATT	54858	NM_017712	pyroglutamyl-peptidase I	chr19:18480282-18480341
A_21_P0004993	-3.52215	-1.81645	down	1.05769	1.06958	0.646787	-0.724448	-0.646787	-1.30407	lnc-C6orf146-1	LNCipedia lincRNA (lnc-C6orf146-1), lincRNA [lnc-C6orf146-1:2]	GGAAGTAATGCAGGAAAGGGAGTTTGTAGGATTTAGATTTCACTGAAAGTGTACTGGACA			lnc-C6orf146-1:2	chr6:4016786-4016727
A_33_P3210203	-3.84552	-1.94318	down	0.985115	0.954922	0.728381	-0.728381	-0.999487	-1.43325	SPIRE2	Homo sapiens spire-type actin nucleation factor 2 (SPIRE2), mRNA [NM_032451]	GCAGCTCTGTAAATCTGTGCACATGGCCACTCTTGGCCTAATAAAGGAGGTCTCACAGTC	84501	NM_032451	spire-type actin nucleation factor 2	chr16:89937668-89937727
A_21_P0010693	-4.86291	-2.28182	down	1.24622	0.915029	1.01234	-0.915029	-0.923634	-1.83321	MST1L	Homo sapiens macrophage stimulating 1-like (MST1L), mRNA [NM_001271733]	TTACCTCCGAACCGCATGCACAACTGGAGGAGAACTTCTGCCAGACCCAGATGGGGATAG	11223	NM_001271733	macrophage stimulating 1-like	chr1:17085425-17085366
A_33_P3273173	-3.01097	-1.59023	down	1.17134	0.638296	0.922532	-0.693031	-0.638296	-0.707188	USP11	Homo sapiens ubiquitin specific peptidase 11 (USP11), mRNA [NM_004651]	TCCCAATTTCTGGGCTACCAGCAGCATGACTCTCAGGAGCTGCTGTCATTCCTCCTGGAC	8237	NM_004651	ubiquitin specific peptidase 11	chrX:47100961-47101020
A_33_P3710442	-4.06243	-2.02234	down	0.913283	0.907637	0.883833	-0.883833	-0.932049	-1.5464	FLJ11710	Homo sapiens cDNA FLJ11710 fis, clone HEMBA1005149. [AK021772]	ATGATTGAAGTACCATTACCATAAATGCTATACATCCATGCATTGGATGTTAAAGGGATC	79904	AK021772	uncharacterized protein FLJ11710	chr17:55357314-55357373
A_21_P0011539	-8.05471	-3.00983	down	1.39899	1.3356	1.17807	-1.17807	-1.56204	-2.37673	XLOC_l2_005737	BROAD Institute lincRNA (XLOC_l2_005737), lincRNA [TCONS_l2_00010700]	CTGGCAACAGCTAATGGCAAGAGGGGCATTTTCTCATTTTATTTTTGTTAAGTCTGAGCT				chr17:30424070-30424129
A_33_P3382746	-3.25159	-1.70115	down	0.762916	0.666325	0.719763	-0.666325	-1.09314	-1.19496	LCK	Homo sapiens LCK proto-oncogene, Src family tyrosine kinase (LCK), transcript variant 2, mRNA [NM_005356]	AGAAGCCATTAACTACGGGACATTCACCATCAAGTCAGATGTGTGGTCTTTTGGGATCCT	3932	NM_005356	LCK proto-oncogene, Src family tyrosine kinase	chr1:32745711-32745770
A_24_P583225	-3.22376	-1.68874	down	0.898682	0.921471	0.780612	-0.780612	-0.832636	-0.852215	LINC00265	Homo sapiens long intergenic non-protein coding RNA 265 (LINC00265), long non-coding RNA [NR_026999]	GCAGTAAAGATGATTCTGAAGAATGGCATGGGATGGATCCTTTCGAATGCACTTGAGCAG	349114	NR_026999	long intergenic non-protein coding RNA 265	chr7:39821393-39821452
A_24_P306594	-6.91234	-2.78917	down	1.59579	1.21843	1.29347	-1.4701	-1.57129	-1.21843	C1orf167	Homo sapiens chromosome 1 open reading frame 167 (C1orf167), mRNA [NM_001010881]	AGAGCATGGGGCCCAGCTGCAGCTGTGACTTGTTCTCATAGAATAAAAAACAGAACTGAA	284498	NM_001010881	chromosome 1 open reading frame 167	chr1:11849476-11849535
A_24_P481375	-4.89354	-2.29088	down	0.901028	0.911006	0.909909	-0.901028	-1.23866	-2.01101	LOC100131564	Homo sapiens uncharacterized LOC100131564 (LOC100131564), long non-coding RNA [NR_034089]	AGTCATGGTCTCTGAAAGTAAAATGTCTATTCTTCTAATTCTGGCACAATCTTATCTAGC	100131564	NR_034089	uncharacterized LOC100131564	chr1:93803884-93803825
A_21_P0004871	-6.22766	-2.63869	down	1.2726	1.03293	1.17494	-1.22244	-1.03293	-2.18021	lnc-TCF19-1	PREDICTED: Homo sapiens uncharacterized LOC100996357, transcript variant 1 (LOC100996357), misc_RNA [XR_171563]	TCCCACTTTCTAGTCTCGGACCCAGTATTAAGGAATTCTGGTCACATAGTTTATTCATCC			lnc-TCF19-1:4	chr6:31168307-31168366
A_21_P0011346	-3.19118	-1.67409	down	0.953634	0.587829	0.672464	-0.58783	-0.91501	-1.3055	XLOC_l2_004840	BROAD Institute lincRNA (XLOC_l2_004840), lincRNA [TCONS_l2_00008915]	ACAGTGTGAAAACCCACATCCTGAGAGTGTCAGAAACCCCAGGGAGGAGGCAGCTGTGCT				chr15:22448380-22448321
A_33_P3285868	-5.02612	-2.32945	down	0.180655	-0.00846338	0.00846291	-2.47107	-2.06739		CYGB	Homo sapiens cytoglobin (CYGB), mRNA [NM_134268]	GCAACCGCCCGTCCTCCTTTTCTAGTTTCTGATGTTTGTAACCAGACCCAGCTGTGTCAT	114757	NM_134268	cytoglobin	chr17:74523520-74523461
A_23_P165676	-3.90126	-1.96394	down	1.01007	0.976701	0.830614	-0.890169	-0.830614	-1.35365		mitotic spindle organizing protein 2A [Source:HGNC Symbol;Acc:HGNC:33187] [ENST00000491265]	TGGAGTAGGGGTGTATGCACTGCAGGCTGAGATGAGCAATTGAGGGGCAAGTGTCCAGCA		XM_005263792		chr2:132247616-132247557
A_23_P207564	-3.06225	-1.61459	down	1.01446	0.570047	0.671165	-0.570047	-0.915983	-1.10208	CCL4L2	Homo sapiens chemokine (C-C motif) ligand 4-like 2 (CCL4L2), transcript variant CCL4L2b2, mRNA [NM_001291470]	CAGGAAGTCTTCAGGGAAGGTCACCTGAGCCCGGATGCTTCTCCATGAGACACATCTCCT	9560	NM_001291470	chemokine (C-C motif) ligand 4-like 2	chr17:34539984-34540043
A_21_P0009786	-3.30342	-1.72396	down	0.913774	0.802774	0.719858	-0.968611	-1.04701	-0.719858	LOC100996681	PREDICTED: Homo sapiens uncharacterized LOC100996681 (LOC100996681), ncRNA [XR_158931]	GACTCAAGAAAAACAAGAGAGCTTCATTAGTCCGTTTTCATGCTGCTATTAAAAACTGCC	100996681	XR_158931	uncharacterized LOC100996681	chr19:34046596-34046655
A_24_P366644	-4.89898	-2.29248	down	0.953048	1.035	0.97045	-1.18268	-1.78322	-0.953048		eukaryotic translation elongation factor 1 alpha 1 pseudogene 32 [Source:HGNC Symbol;Acc:HGNC:37909] [ENST00000418613]	TGGTGCTGATGAATCTGAACTTGGTATCTCCAAGAATGAGCAGACTCATGAGCATATCCC				chr1:197658626-197658685
A_19_P00320924	-3.70484	-1.88941	down	0.987428	0.767741	1.20944	-0.767741	-0.844288	-1.09159	LINC01021	Homo sapiens long intergenic non-protein coding RNA 1021 (LINC01021), long non-coding RNA [NR_038848]	GTGAATTTAGGCCTACGTGAATAATAATATAATATTTACTATGATGTTACTATCTACCAA	643401	NR_038848	long intergenic non-protein coding RNA 1021	chr5:27496356-27496415
A_23_P38427	-3.34274	-1.74103	down	0.748336	0.764326	0.833091	-0.748336	-0.888203	-1.2408	RAB11FIP4	RAB11 family interacting protein 4 (class II) [Source:HGNC Symbol;Acc:HGNC:30267] [ENST00000621161]	AGATGGCCTCTGACTCTGTGGGATTCAACTTGACTTTTTTGCCCCAGGAGGCTCTGTCTG	84440	AJ314646	RAB11 family interacting protein 4 (class II)	chr17:29864961-29865020
A_24_P918175	-3.48747	-1.80218	down	1.01719	0.780645	1.10763	-0.780645	-0.889236	-0.831191	LOC653581	Homo sapiens TANK-binding kinase 1, mRNA (cDNA clone IMAGE:3938647), partial cds. [BC009864]	AATACATTTAAAAACTGCCCGTTGTGTCGACGCTCGGAAAGAGGGTAGAAAACAGCGAGT	653581	BC009864	uncharacterized LOC653581	chr12:64846423-64846364
A_21_P0012899	-4.30172	-2.10492	down	0.901728	0.955161	1.03651	-1.22001	-0.901728	-1.2996	LOC102725134	PREDICTED: Homo sapiens uncharacterized LOC102725134 (LOC102725134), transcript variant X2, ncRNA [XR_431880]	TGTCTGTCACTGTAAGATCCTTCTATCCTCTGAAATAAGGAGAACATTTTAACTTCAGTA	102725134		uncharacterized LOC102725134	chr5:69218735-69218794
A_23_P115375	-3.97526	-1.99105	down	0.89072	1.04128	1.02714	-1.0462	-0.89072	-1.07709	HIST2H3D	Homo sapiens histone cluster 2, H3d (HIST2H3D), mRNA [NM_001123375]	TGGTGGGGCTGTTCGAAGACACGAACCTGTGCGCCATCCATGCCAAGCGCGTGACCATCA	653604	NM_001123375	histone cluster 2, H3d	chr1:120904981-120905040
A_33_P3257678	-11.1636	-3.48073	down	1.50394	1.66363	1.62289	-2.28288	-1.50394	-1.86491	HIST2H3A	Homo sapiens histone cluster 2, H3a (HIST2H3A), mRNA [NM_001005464]	AAGAAGTGGCGGTTCGGCCGGAGGTTCCATCGTATCCAAAAGGCTCTTTTCAGAGCCACC	333932	NM_001005464	histone cluster 2, H3a	chr1:149824626-149824685
A_33_P3620246	-3.20296	-1.6794	down	0.929707	0.722571	0.676113	-0.883508	-0.676113	-1.1502		Homo sapiens cDNA FLJ59077 complete cds, highly similar to Golgin subfamily A member 6. [AK302879]	AGTGAAGATGAAAAAGAAAAACACTGGCAGTAGCCCTGAGACAGCCACTTTTGGTGGTTG		XR_109175		chr15:76069736-76069795
A_33_P3336587	-3.31927	-1.73087	down	0.689744	0.97114	0.877953	-0.697435	-0.689744	-1.26658	LOC283710	Homo sapiens uncharacterized LOC283710 (LOC283710), mRNA [NM_001243538]	CGAGGATGAAGACTTCTATGATAATCCACTTCCACTTAGTAAATGCTTTCTCTTATGATA	283710	NM_001243538	uncharacterized LOC283710	chr15:31515097-31515038
A_33_P3328061	-4.38873	-2.1338	down	1.19057	0.982909	0.887424	-0.932971	-0.887424	-1.52011			CCAGTTGCTTTCATTTTGAACCAGAAGCACTAGCATATTATTGACTTGTAGCTTCATAAA				chr2:225363631-225363572
A_33_P3381305	-3.56289	-1.83305	down	0.678197	0.749926	0.821852	-1.35912	-1.21185	-0.678197			TCCATCCATCCATCCATCCATACATACATACATGCATACATCCACCTATCTCTTCATCCA				chr14:104670847-104670906
A_23_P164966	-7.52824	-2.91231	down	1.4494	1.25467	1.33517	-1.25467	-1.51591	-1.92712	NLRP4	Homo sapiens NLR family, pyrin domain containing 4 (NLRP4), mRNA [NM_134444]	GCTGGCCTTCTAACCAACAACAAGAAGCTGACGTATCTGAATGTATCCTGCAACCAGTTA	147945	NM_134444	NLR family, pyrin domain containing 4	chr19:56379118-56379177
A_21_P0014375	-5.69418	-2.50949	down	1.26835	1.25084	0.924736	-0.924736	-1.27871	-1.88109			TGTGAGTTTCATTGTTTTGTTGGGAACGAAAGAAAATTGTCCATAAGACATAATGACAGG				chr19:058308603-058308662
A_33_P3247639	-3.79597	-1.92447	down	1.01763	0.80535	0.721801	-1.23278	-1.27405	-0.721801		immunoglobulin heavy variable 3/OR16-10 (non-functional) [Source:HGNC Symbol;Acc:HGNC:5634] [ENST00000425181]	GTATCTTCAAATGAACAGCCTGATAGCTGAGGACATGGCTGTGTATTATTGTGCAAGAGA		XM_005275748		chr16:33006767-33006826
A_33_P3354607	-3.42503	-1.77612	down	1.02522	0.701275	0.730904	-0.701275	-0.952653	-1.21702	CCL4L2	Homo sapiens chemokine (C-C motif) ligand 4-like 2 (CCL4L2), transcript variant CCL4L2b2, mRNA [NM_001291470]	AAGTCTGTGCTGATCCCAGTGAATCCTGGGTCCAGGAGTACGTGTATGACCTGGAACTGA	9560	NM_001291470	chemokine (C-C motif) ligand 4-like 2	chr17:34539907-34539966
A_23_P15108	-3.51131	-1.81201	down	0.638284	0.973392	0.917248	-0.638284	-0.97398	-1.29484	YPEL3	Homo sapiens yippee-like 3 (Drosophila) (YPEL3), transcript variant 1, mRNA [NM_031477]	GAGCAGCCAGAAGTACAAAGAGGGGAAGTACATCATTGAACTCAACCACATGATCAAAGA	83719	NM_031477	yippee-like 3 (Drosophila)	chr16:30104106-30104047
A_23_P121374	-21.7742	-4.44455	down	2.00438	1.99779	2.09278	-2.02774	-1.99779	-3.21318	SEMA5B	Homo sapiens sema domain, seven thrombospondin repeats (type 1 and type 1-like), transmembrane domain (TM) and short cytoplasmic domain, (semaphorin) 5B (SEMA5B), transcript variant 1, mRNA [NM_001031702]	TCTGTGCCTCTATGGAGACTATCTTCCAGTTGCTGCTCAACAGAGTTGTTGGCTGAGACC	54437	NM_001031702	sema domain, seven thrombospondin repeats (type 1 and type 1-like), transmembrane domain (TM) and short cytoplasmic domain, (semaphorin) 5B	chr3:122628245-122628186
A_23_P393401	-4.24718	-2.08651	down	1.03336	0.886802	1.0543	-0.886802	-1.11339	-1.28486	PDXDC2P	Homo sapiens pyridoxal-dependent decarboxylase domain containing 2, pseudogene (PDXDC2P), non-coding RNA [NR_003610]	CAATGACTTTTCTTTACCCCCTAGCTGTCGGCAGTACTCAGTGGAAGGGTGATATTATGA	283970	NR_003610	pyridoxal-dependent decarboxylase domain containing 2, pseudogene	chr16:70010123-70010086
A_33_P3230444	-4.73089	-2.24211	down	1.28091	1.05674	0.93329	-0.93329	-1.19629	-1.32581		immunoglobulin heavy variable 7-81 (non-functional) [Source:HGNC Symbol;Acc:HGNC:5669] [ENST00000390639]	ATACCTGCAGATCAGCAGCCTAAAGGCTGAGGACATGGCCATGTATTACTGTGCGAGATA		BC032733		chr14:107282849-107282792
A_33_P3217500	-3.641	-1.86433	down	0.685327	0.782019	0.93394	-1.14583	-0.685327	-1.36055		HHAGE004513 Human liver regeneration after partial hepatectomy Homo sapiens cDNA, mRNA sequence [DW451783]	GGTTAATGTGTAATTGCTTCACTGAGCATGTGCTGTGACCCAGGCAGCACATAAAACAGA		DW451783		chr16:29543838-29543779
A_33_P3378697	-3.51327	-1.81281	down	0.571228	1.28693	1.15363	-0.988926	-0.571228	-0.866498		PREDICTED: Homo sapiens carboxy-terminal domain RNA polymerase II polypeptide A small phosphatase 2-like (LOC101060081), misc_RNA [XR_171111]	TTGCAAACCTGGTCTTTCTTCAGTGCTGCAAGGCCTATGCCAAGGAGAAAGGAAAAGTAT		XR_171111		chr7_gl000195_random:82224-82283
A_21_P0002586	-4.13772	-2.04883	down	0.910203	0.936896	0.900058	-0.900058	-1.31253	-1.18676	YIPF4	Yip1 domain family, member 4 [Source:HGNC Symbol;Acc:HGNC:28145] [ENST00000238831]	CCAGCCTGTCAGAGCTTTTGAGTAGAAATACGGTATCAGAAATGTGCTTTATTTTATTTT	84272		Yip1 domain family, member 4	chr2:32538729-32538788
A_21_P0011857	-3.3016	-1.72317	down	0.77821	0.814885	0.695772	-0.695772	-0.833216	-1.35164	DARS-AS1	Homo sapiens DARS antisense RNA 1 (DARS-AS1), transcript variant 2, long non-coding RNA [NR_110200]	TGCCTGCAGGAGCCTAGTATTATCCTCTCTCACAGAACCATGGCAGGGAATAATAAATTG	101928243		DARS antisense RNA 1	chr2:136762735-136762794
A_19_P00317775	-4.14752	-2.05225	down	0.812918	1.13207	1.14138	-0.812918	-1.00218	-1.25528	IPW	Homo sapiens imprinted in Prader-Willi syndrome (non-protein coding) (IPW), long non-coding RNA [NR_023915]	CAGCTCATGCAGATTTTCAAACACATTAGCCTTGTTATACAAAGTGTTCTTTCATCATTC	3653	NR_023915	imprinted in Prader-Willi syndrome (non-protein coding)	chr15:25367338-25367397
A_33_P3210516	-3.17408	-1.66634	down	0.702045	0.901876	0.791206	-0.702045	-0.810619	-1.09123			ACCATGGAGATGCAAACTACCTCCTTTAAATCTGTGAGAATTCTAGCATGTTCACTGTTC				chr2:020988708-020988649
A_24_P55148	-3.14444	-1.6528	down	0.794226	0.779367	0.908857	-0.780478	-0.779367	-0.916114	HIST1H2BJ	Homo sapiens histone cluster 1, H2bj (HIST1H2BJ), mRNA [NM_021058]	TGACACCGGCATTTCGTCCAAGGCCATGGGCATCATGAATTCGTTTGTGAACGACATTTT	8970	NM_021058	histone cluster 1, H2bj	chr6:27100377-27100318
A_33_P3224800	-6.35059	-2.66689	down	1.30556	1.29978	1.34525	-1.37343	-1.29978	-1.37687	NCF1B	neutrophil cytosolic factor 1B pseudogene [Source:HGNC Symbol;Acc:HGNC:32522] [ENST00000435988]	AAGCCAGAGACATACTTGATGCCCAAAGATGGCAAGAGTACCGCGACAGGTGAGAGGACG	654816		neutrophil cytosolic factor 1B pseudogene	chr7:72641451-72641510
A_33_P3327697	-3.91258	-1.96812	down	0.990437	0.95286	0.811246	-1.26534	-1.07323	-0.811246	LOC145474	Homo sapiens uncharacterized LOC145474 (LOC145474), long non-coding RNA [NR_027046]	ATTGTCTCAGGCCACGCATAAAGTACACTAACACTAATGATAGCTGATTAGCTTAAAAAA	145474	NR_027046	uncharacterized LOC145474	chr14:71956365-71956424
A_33_P3509233	-8.45664	-3.08009	down	1.64181	1.49293	1.3607	-1.3607	-1.58833	-1.79579	LINC00877	Homo sapiens long intergenic non-protein coding RNA 877 (LINC00877), long non-coding RNA [NR_104116]	ACCCAGGGATTTGCCACAGTAGGAAGACATGACCACTACTAGGATAGAGAGGTAAAAAAT	285286	NR_104116	long intergenic non-protein coding RNA 877	chr3:72084729-72084670
A_33_P3379535	-3.86932	-1.95208	down	0.690829	0.95224	1.07238	-1.36433	-0.690828	-1.08564		Homo sapiens cDNA FLJ45698 fis, clone FEBRA2017811. [AK127601]	TAAACACATACATGCACACATACACATACACACACATACGCACATATACACACATACAGA		AK127601		chr12:50271771-50271712
A_33_P3353864	-3.03645	-1.60239	down	0.661486	0.772033	0.60139	-0.60139	-0.807913	-1.36295	LOC143666	Homo sapiens uncharacterized LOC143666 (LOC143666), long non-coding RNA [NR_026967]	AAGGAGGGTGAATCTTCTAAGTGATAAAGTGAAGCAAGTCACGTGATCATAGGACAGGGG	143666	NR_026967	uncharacterized LOC143666	chr11:574411-574352
A_33_P3240941	-3.37644	-1.7555	down	0.641335	1.33978	1.25075	-0.751325	-0.641335	-0.641974	BACE1	Homo sapiens beta-site APP-cleaving enzyme 1 (BACE1), transcript variant a, mRNA [NM_012104]	TTTAGAGACAGGGACTGTATAAACAAGCCTAACATTGGTGCAAAGATTGCCTCTTGAATT	23621	NM_012104	beta-site APP-cleaving enzyme 1	chr11:117159804-117159745
A_23_P436281	-4.5717	-2.19273	down	0.860367	0.941608	0.987974	-1.07918	-0.860367	-1.8487	HIST2H4B	Homo sapiens histone cluster 2, H4b (HIST2H4B), mRNA [NM_001034077]	CTCATTTACGAGGAGACCCGCGGTGTGCTGAAGGTGTTCCTGGAGAATGTGATTCGGGAC	554313	NM_001034077	histone cluster 2, H4b	chr1:149804396-149804455
A_24_P33982	-3.52196	-1.81638	down	0.886567	0.89546	0.686852	-0.686852	-0.829761	-1.46364	MILR1	Homo sapiens mast cell immunoglobulin-like receptor 1 (MILR1), transcript variant S2, mRNA [NM_001291317]	GTGGTGATAATCCTAATTCTGGCTTTTTGGGTACTGCCCAAATACAAAACAAGAAAAGCT	284021	NM_001291317	mast cell immunoglobulin-like receptor 1	chr17:62461517-62461576
A_33_P3270315	-6.22226	-2.63744	down	1.26515	1.15377	1.35181	-1.15377	-1.16	-1.82782		Homo sapiens hypothetical LOC114130, mRNA (cDNA clone IMAGE:3937896). [BC009492]	CATCATACGGCGGTCAGGTCCATCATACGGCGGTCAGGTCCATCATACGGCGGTCAGGTC		BC009492		chr12:129298767-129298728
A_24_P945283	-4.25475	-2.08907	down	1.29739	0.740833	0.919315	-0.740833	-1.05445	-1.5144	DLG3	Homo sapiens discs, large homolog 3 (Drosophila) (DLG3), transcript variant 1, mRNA [NM_021120]	ACTCCTTCATCTCTAACAGAGGAAGAACTGTATTATCAAACCTTATGGTCTACCCATGAA	1741	NM_021120	discs, large homolog 3 (Drosophila)	chrX:69725254-69725313
A_33_P3270311	-4.43779	-2.14984	down	1.00303	0.940733	0.8912	-0.8912	-0.89237	-1.83098	HECW2	Homo sapiens HECT, C2 and WW domain containing E3 ubiquitin protein ligase 2 (HECW2), mRNA [NM_020760]	GGGTTATAGAAATCTGGAAATAAGAAAGGAAGAGCTCTCTGTATTCTATAATTGGAAGAG	57520	NM_020760	HECT, C2 and WW domain containing E3 ubiquitin protein ligase 2	chr2:197064113-197064054
A_19_P00318559	-3.65619	-1.87034	down	0.836266	0.76384	0.906678	-0.766164	-0.76384	-1.57424	LINC01021	long intergenic non-protein coding RNA 1021 [Source:HGNC Symbol;Acc:HGNC:48995] [ENST00000512067]	CTACGTTTTGGTTAATGGACTGAAAGTGAAAGATGGACTGAAATTGGGGGATGGAATAAA	643401	CQ819097	long intergenic non-protein coding RNA 1021	chr5:27485707-27485766
A_21_P0009797	-3.66843	-1.87516	down	0.67484	1.05776	0.86453	-0.67484	-1.02278	-1.33075	lnc-ZNF8-3	LNCipedia lincRNA (lnc-ZNF8-3), lincRNA [lnc-ZNF8-3:1]	TGGATAACTAACAAATTATTTCAAATGTGTGCCTATAGGTGAGAGAAGCAATGGTACATG			lnc-ZNF8-3:1	chr19:58783078-58783137
A_33_P3324333	-3.27776	-1.71271	down	0.827441	0.65128	0.798617	-1.03633	-0.65128	-1.17318		ankyrin repeat domain 20 family, member A5, pseudogene [Source:HGNC Symbol;Acc:HGNC:33833] [ENST00000581935]	TGAGTTTAAGTTCAGCTTGAGCAACATAGTGAGACTCTTGCCTCTAACAACAATAACACC		BC022023		chr18:14185309-14185368
A_24_P53215	-3.02302	-1.59599	down	0.816114	0.759996	0.87406	-0.782816	-0.794992	-0.759996	UNC13D	Homo sapiens unc-13 homolog D (C. elegans) (UNC13D), mRNA [NM_199242]	TACAGGCACAGAGTCTCCTGGAAAAGGGAGAGGGGACCCTGCCAAAGATGAGGCTCCAGC	201294	NM_199242	unc-13 homolog D (C. elegans)	chr17:73823642-73823583
A_21_P0011768	-3.42429	-1.7758	down	0.789915	0.93119	0.726894	-0.726894	-1.26453	-0.887989	XLOC_l2_006648	BROAD Institute lincRNA (XLOC_l2_006648), lincRNA [TCONS_l2_00012388]	GCTGCTTTTTCATTGTTTTGGGGACACACAAATATCTTCCTAATTTTGAGAAACTGAAAC				chr19:20976982-20977041
A_23_P140427	-3.21812	-1.68622	down	0.692649	0.74452	0.75696	-0.692649	-0.860966	-1.31091	EVL	Homo sapiens Enah/Vasp-like (EVL), mRNA [NM_016337]	TACATTTCTTTGGGTTTCTAGAGACGCCCCTAAGTCACCTGCTTCATTAGACGGTTTCCA	51466	NM_016337	Enah/Vasp-like	chr14:100610330-100610389
A_24_P183128	-3.7118	-1.89212	down	0.96189	0.820239	0.753758	-0.753758	-0.978278	-1.40844	PLAC8	Homo sapiens placenta-specific 8 (PLAC8), transcript variant 2, mRNA [NM_016619]	TAAAAACTGATGGTGAAAAGCTCTTACCGAAGCAACAAAATTCAGCAGACACCTCTTCAG	51316	NM_016619	placenta-specific 8	chr4:84015842-84012077
A_33_P3389376	-3.04854	-1.60812	down	0.617899	0.654726	0.925846	-0.739511	-0.617899	-1.26847	MDM4	Homo sapiens MDM4, p53 regulator (MDM4), transcript variant 6, mRNA [NM_001278518]	AGCATATGGTATATTGTGGTGGAGATCTTTTGGGAGAACTACTGGGACGTCAGAGCTTCT	4194	NM_001278518	MDM4, p53 regulator	chr1:204499870-204499929
A_32_P21246	-5.81487	-2.53975	down	1.00314	1.14724	1.19627	-1.00314	-1.31814	-1.95131	HCG27	Homo sapiens HLA complex group 27 (non-protein coding) (HCG27), long non-coding RNA [NR_026791]	GGCTTTACAAAATAAAATCATGCTTGGAAAACTTCTCCTCTGAGGGATGTCAAAGGCTGC	253018	NR_026791	HLA complex group 27 (non-protein coding)	chr6:31171095-31171154
A_21_P0007511	-10.4991	-3.39219	down	1.64052	1.42459	1.38338	-1.38338	-1.61439	-2.73031	lnc-WNK1-1	LNCipedia lincRNA (lnc-WNK1-1), lincRNA [lnc-WNK1-1:1]	CAATTCAAACTGACAGAGGTCTTAAGCAATTTTCATGACAATATTGGTGTATAGAGCTGA			lnc-WNK1-1:1	chr12:837344-837403
A_33_P3407049	-9.05804	-3.1792	down	1.63528	1.37996	1.68297	-1.37996	-1.67493	-1.7845			AAGAGAAGCTCACTGCAGAATGGACTAGAAGCCAAAACTATGACACTTGAGTTTTTCACC				chr7:143342842-143342783
A_33_P3371650	-4.51325	-2.17417	down	0.901875	0.935171	1.05729	-0.901875	-1.15716	-1.56913	STK17B	Homo sapiens serine/threonine kinase 17b (apoptosis-inducing), mRNA (cDNA clone IMAGE:6280720), partial cds. [BC052561]	CACTTTCACTTAATCGTTAAATTGCCTTAAAATTGCATGCATAGTATATTGTAATTCACA	9262	BC052561	serine/threonine kinase 17b	chr2:197034187-197034128
A_33_P3260614	-3.50678	-1.81015	down	0.705388	0.974521	0.964225	-0.705388	-0.833202	-1.24771	PLCB2	Homo sapiens phospholipase C, beta 2 (PLCB2), transcript variant 1, mRNA [NM_004573]	GACAAGGTCAGCATCATTTGCTCTCCTGAATTTATGAGGTTTATTTATTTTTCTCTTTCC	5330	NM_004573	phospholipase C, beta 2	chr15:40580198-40580139
A_32_P220770	-5.87828	-2.5554	down	1.34671	1.08879	1.18565	-1.08879	-1.44283	-1.51342	HCG26	Homo sapiens HLA complex group 26 (non-protein coding) (HCG26), long non-coding RNA [NR_002812]	GCAGGTTGTTTAACCTTATATGTACAGTTTCACATATGTATAAAAACAGTAGTTTGGGCC	352961		HLA complex group 26 (non-protein coding)	chr6:31440121-31440180
A_33_P3259865	-6.04327	-2.59533	down	1.23706	1.07751	1.04968	-1.64511	-1.04968	-1.72695	C1orf220	Homo sapiens chromosome 1 open reading frame 220 (C1orf220), long non-coding RNA [NR_033186]	TTTAATATATGGGCAAATGTACATGGTTAGGCTAGACTGGAGCACTTGTCTACACTGCTT	400798	NR_033186	chromosome 1 open reading frame 220	chr1:178517965-178518024
A_33_P3281363	-3.86315	-1.94978	down	0.680197	0.89856	1.15906	-0.680197	-1.0003	-1.43103	TRIP12	Homo sapiens thyroid hormone receptor interactor 12, mRNA (cDNA clone IMAGE:5742743), with apparent retained intron. [BC037956]	CAGGACATCTTAATTAAAGAACAGTTTCAACGGCACAAGAAATTTGTCAAAAGCCACATA	9320	BC037956	thyroid hormone receptor interactor 12	chr2:230695852-230695793
A_21_P0011401	-4.20274	-2.07133	down	0.911015	0.869125	1.0335	-0.869125	-1.07126	-1.45997	LOC100996255	Homo sapiens uncharacterized LOC100996255 (LOC100996255), long non-coding RNA [NR_102756]	ATCACCGTGTGTTACTGGCACAGATGCATCGGCTAGTGAAGAAAGAAGACATTCAAACTA	100996255		uncharacterized LOC100996255	chr15:32868143-32871909
A_23_P78108	-3.23419	-1.69341	down	0.756086	0.786795	0.758104	-0.756086	-1.07012	-0.953027	ALDOC	Homo sapiens aldolase C, fructose-bisphosphate (ALDOC), mRNA [NM_005165]	TGGCCAGGGCCAAATAGCTATGCAGAGCAGAGATGCCTTCACCTGGCACCAACTTGTCTT	230	NM_005165	aldolase C, fructose-bisphosphate	chr17:26900482-26900423
A_23_P117971	-3.18905	-1.67313	down	1.0975	0.809791	0.735633	-0.812513	-0.828312	-0.735633		Human B-cell growth factor (BCGF1) mRNA, complete cds. [M15530]	AGGCAGGAAGATCACTTGAGGCCAGGAGTTCCAAAATATTCTGTATCTTGATTGTGGTGG		M15530		chr16:58588342-58588401
A_24_P277673	-3.25651	-1.70333	down	1.05445	0.911946	0.585375	-1.24247	-0.585375	-0.730361	HIST1H4G	Homo sapiens histone cluster 1, H4g (HIST1H4G), mRNA [NM_003547]	CAAGGTACTGAGCGATAATATTCAGGGCATTACCAAGTGCACTATCCGGCGCTTGGCCCG	8369	NM_003547	histone cluster 1, H4g	chr6:26247146-26247087
A_23_P163467	-7.63228	-2.93211	down	1.41673	1.33178	1.288	-1.44337	-1.288	-2.02846	C15orf52	Homo sapiens chromosome 15 open reading frame 52 (C15orf52), mRNA [NM_207380]	TTGGAGTTGGACTCTGTCTTAACAGTAGCGTGGCACACAGAAGGCACTCAGTAAATACTT	388115	NM_207380	chromosome 15 open reading frame 52	chr15:40623743-40623684
A_23_P66311	-3.82614	-1.93589	down	0.939213	0.846973	0.77214	-0.77214	-1.04646	-1.43075	DNASE1	Homo sapiens deoxyribonuclease I (DNASE1), mRNA [NM_005223]	ACCTGGATGTCCAAGAGAAATGGGGCTTGGAGGACGTCATGTTGATGGGCGACTTCAATG	1773	NM_005223	deoxyribonuclease I	chr16:3707081-3707215
A_21_P0014775	-3.42702	-1.77696	down	0.95984	0.757833	0.914093	-0.757833	-0.85141	-1.08986		Homo sapiens cDNA FLJ27284 fis, clone TMS01544. [AK130794]	TGGGTGATGCCAGGTGAGCAGGGTGGGGATGCATGTGGACAAAAATTAATAAAAACATGA		AK130794		chr8:066645485-066645426
A_24_P20873	-4.00993	-2.00358	down	0.789092	0.835481	0.988214	-1.05514	-0.789092	-1.55371	HIST1H4I	Homo sapiens histone cluster 1, H4i (HIST1H4I), mRNA [NM_003495]	CATTTCTGGCCTCATCTATGAGGAGACCCGCGGAGTGTTGAAGGTGTTCCTGGAGAACGT	8294	NM_003495	histone cluster 1, H4i	chr6:27107225-27107284
A_23_P92349	-3.44715	-1.7854	down	0.704695	1.01056	1.06621	-0.704695	-0.756328	-1.11373	FGFRL1	Homo sapiens fibroblast growth factor receptor-like 1 (FGFRL1), transcript variant 1, mRNA [NM_001004356]	CTGGACACACACATGTGCACAGATATGCTGTCTGGACATGCACACACGTGCAGATATGCT	53834	NM_001004356	fibroblast growth factor receptor-like 1	chr4:1019939-1019998
A_24_P304154	-3.26364	-1.70648	down	0.687555	0.736367	0.674776	-0.674776	-0.953297	-1.39268	AMPD3	Homo sapiens adenosine monophosphate deaminase 3 (AMPD3), transcript variant 3, mRNA [NM_001025390]	AAAGCATTTTTAAAGATTAATCTGAATTAAGCTTTATCAGTGTACTCTTTATCTGTGTTA	272	NM_001025390	adenosine monophosphate deaminase 3	chr11:10528563-10528622
A_23_P215505	-4.25628	-2.08959	down	1.24854	0.959041	0.962153	-0.959041	-1.06656	-1.07344	RAPGEF5	Homo sapiens Rap guanine nucleotide exchange factor (GEF) 5 (RAPGEF5), mRNA [NM_012294]	TCGTATTACACTGTTATTAAATACTGGGATGAAATCAGTGACCTGAAGCAAGAAATCTTG	9771	NM_012294	Rap guanine nucleotide exchange factor (GEF) 5	chr7:22158392-22158333
A_33_P3265479	-3.9473	-1.98087	down	0.902255	0.961217	1.00635	-0.902255	-1.23204	-0.938481	ZFAT	zinc finger and AT hook domain containing [Source:HGNC Symbol;Acc:HGNC:19899] [ENST00000522974]	AGTAATGGCAAAATGGCAACGTGAGAGGGACAGTGACGTCAATACAACAATGTACTCTCC	57623	AB167741	zinc finger and AT hook domain containing	chr8:135609851-135609792
A_33_P3359713	-5.31174	-2.40918	down	1.06847	1.04538	1.20667	-1.58882	-1.27281	-1.04538		ik35e10.y5 HR85 islet Homo sapiens cDNA clone IMAGE:5783130 5' similar to SW:TCPZ_HUMAN P40227 T-COMPLEX PROTEIN 1, ZETA SUBUNIT ;, mRNA sequence [CK825926]	ACAGGTAAGAGAATGCAACTGTTTGTAGAGGAAAAACTAGATGTAGTACATGTGAGTTGA		CK825926		chr7:65226732-65226791
A_33_P3389578	-3.48082	-1.79943	down	1.10495	0.700433	0.82989	-1.13847	-0.924112	-0.700433			TCCAGTAATCTCAGCACTTTGGTATGCTGGGGTGAGAGTATCACTTGAGGTCAGAAGTTT				chr12:004218799-004218740
A_21_P0014189	-4.25231	-2.08825	down	0.828959	1.09447	1.26884	-1.29477	-0.948737	-0.828959			GTAGGAGTGATTCCCCAATGCTAGAACCTTTGGTCAAATATAATTCTAATCCAGTCAAAA				chr7:050366178-050366237
A_21_P0014529	-7.27242	-2.86243	down	1.54382	1.23005	1.33713	-1.23005	-1.26316	-1.9831		Homo sapiens cDNA FLJ40004 fis, clone STOMA2004194. [AK097323]	CAAATCATCTGGAACTTGTGATCTATTACTAAAGCATACCAGCTATTATTCACTCTGATG		AK097323		chr14:64907215-64907156
A_33_P3359084	-3.80252	-1.92696	down	1.02214	0.792334	0.937011	-0.792334	-0.964031	-1.27302	TAS1R3	taste receptor, type 1, member 3 [Source:HGNC Symbol;Acc:HGNC:15661] [ENST00000339381]	CGGAGAGAAGGGGCACAGGCCACACATCTGTCCCATAAAATTAAACGCTTTTTAGTGTTT	83756	AK122959	taste receptor, type 1, member 3	chr1:1270628-1270686
A_33_P3235321	-3.09177	-1.62843	down	0.741034	0.720291	0.867694	-0.720291	-0.901275	-0.934716	SYTL1	Homo sapiens synaptotagmin-like 1 (SYTL1), transcript variant 2, mRNA [NM_032872]	CAAGCGCAAGACGGCGGTGAAGAAACGGAATCTGAATCCGGTTTTCAACGAGACTCTCCG	84958	NM_032872	synaptotagmin-like 1	chr1:27676916-27676975
A_23_P216935	-3.19721	-1.67681	down	0.686818	0.724351	0.90259	-0.686818	-0.882555	-1.14731	MIR600HG	Homo sapiens MIR600 host gene (non-protein coding) (MIR600HG), long non-coding RNA [NR_026677]	ACTGTGTTTTTCTGAATACGCAAGTGTAAATAGTATAATTTGCAGTGCAAAATCCTTGGC	81571	NR_026677	MIR600 host gene (non-protein coding)	chr9:125872202-125872143
A_21_P0000075	-3.25134	-1.70103	down	0.759712	0.717712	0.810209	-0.717712	-0.817185	-1.28057	SAP25	Homo sapiens Sin3A-associated protein, 25kDa (SAP25), mRNA [NM_001168682]	CTTCTCAGGGCAGAGTGGGCTGGTTGTGTTGACAATAAAACAGTGTTGGTTTGCAAAAAA	100316904	NM_001168682	Sin3A-associated protein, 25kDa	chr7:100169908-100169849
A_24_P922252	-3.62002	-1.856	down	0.849881	0.90958	0.707012	-0.707012	-0.862873	-1.53164	SPATA5L1	Homo sapiens cDNA FLJ12286 fis, clone MAMMA1001768, weakly similar to CELL DIVISION CYCLE PROTEIN 48 HOMOLOG MJ1156. [AK022348]	AGGATTTTCGTATATTCAGAATCTAAAGTATACGTAAAGTGCACGGTACTAGTTCCAAAG	79029	AK022348	spermatogenesis associated 5-like 1	chr15:45696608-45696667
A_33_P3268954	-4.30478	-2.10594	down	1.14115	1.18381	0.856009	-1.31363	-0.856009	-0.967218	FBLL1	Homo sapiens fibrillarin-like 1 (FBLL1), non-coding RNA [NR_024356]	AGGAAGTTGCAGCAGGAGAACTTGAAGCCTCAAGAGCAGCTGACCCTGGAGCCCTATGAG	345630	NR_024356	fibrillarin-like 1	chr5:167957395-167957454
A_33_P3281033	-3.69196	-1.88439	down	0.82299	0.931619	0.958087	-1.09449	-1.02299	-0.82299	MACROD2	Homo sapiens chromosome 20 open reading frame 133, mRNA (cDNA clone IMAGE:4513167). [BC035876]	AAGGGCTCACAGCACTAAAGATTTCACATGAAAGGGTCGTGATTGATTTGAGCAAGCAGG	140733	BC035876	MACRO domain containing 2	chr20:15966546-15966605
A_21_P0013196	-3.36361	-1.75001	down	0.63204	0.640989	0.637454	-0.63204	-1.43865	-1.26886	LOC101928976		TCAAAAGATGTCTTTTTGTCACTTCCAGCTGGATCTACCATGAAAGACTTCTGAATCCAG	101928976		uncharacterized LOC101928976	chr1:222659491-222659432
A_21_P0012156	-3.70836	-1.89078	down	0.84882	1.12259	0.80155	-1.09456	-1.00327	-0.80155		MIR646 host gene (non-protein coding) [Source:HGNC Symbol;Acc:HGNC:27659] [ENST00000458422]	GGAAGACCTGAAGTACCTGTTTAAAAGACAGCCAAAAGATAAGTAAATACTTCCCAAATT				chr20:58859610-58859669
A_23_P154875	-4.16295	-2.05761	down	0.900269	0.780654	0.94877	-0.780654	-1.11384	-1.64863	BACE2	Homo sapiens beta-site APP-cleaving enzyme 2 (BACE2), transcript variant a, mRNA [NM_012105]	TCACTGTCTTTTGATTCTTGATTTTCAAGCTTTCAAATCCTCCCTACTTCCAAGAAAAAT	25825	NM_012105	beta-site APP-cleaving enzyme 2	chr21:42647696-42647755
A_24_P683861	-3.87215	-1.95313	down	1.08895	0.835841	0.852143	-0.835841	-1.04933	-1.19729		immunoglobulin heavy variable 1-12 (pseudogene) [Source:HGNC Symbol;Acc:HGNC:5546] [ENST00000518307]	TGCAATCTGGGTCTGAGTTGAAGAAGCCTGGGGCCTCAGTGAAGGTCTCCTGCAAGGCTT		AB067383		chr14:106579148-106579089
A_33_P3357049	-3.90888	-1.96676	down	1.0454	0.970219	0.718001	-0.718001	-0.916026	-1.53262	RPS15AP10	Homo sapiens ribosomal protein S15a pseudogene 10 (RPS15AP10), non-coding RNA [NR_026768]	GCCAAAGATTTTGTGCTTTGTCAAGCTAATGTTCAGTTATAAAGATCACAGACAAACATC	728963	NR_026768	ribosomal protein S15a pseudogene 10	chr1:46111983-46111924
A_21_P0012654	-3.56098	-1.83228	down	0.743988	0.859648	0.91975	-0.743988	-0.953213	-1.27624	LOC101928803	PREDICTED: Homo sapiens uncharacterized LOC101928803 (LOC101928803), transcript variant X2, ncRNA [XR_251551]	ATCTACCACGAAGCTGTTGTTCCACACCAGAACCAAATGAGCGCAAGATCTGACAAAAAA	101928803	XR_251551	uncharacterized LOC101928803	chr4:9153631-9153119
A_24_P68079	-3.74888	-1.90646	down	0.619247	1.26027	1.1594	-0.619247	-0.832868	-1.22835	TRANK1	Homo sapiens tetratricopeptide repeat and ankyrin repeat containing 1 (TRANK1), mRNA [NM_014831]	AATTGTTTCCTTGAAATGCTTGTTTCCAATTTTTCTTAGATTATGTTTCTAATTTTTATT	9881	NM_014831	tetratricopeptide repeat and ankyrin repeat containing 1	chr3:36868467-36868408
A_21_P0014110	-6.04225	-2.59509	down	1.24723	1.33928	1.01639	-1.03048	-1.01639	-2.13548		ZBTB20 antisense RNA 2 [Source:HGNC Symbol;Acc:HGNC:42421] [ENST00000478301]	GCACAGGGCCCTTAACAATCCATAGGGAGATTTACTTGCTTAAGGAAAATAAATAGGTAA				chr3:114406374-114406433
A_23_P163238	-4.10132	-2.03609	down	0.709252	1.29288	0.952253	-1.24609	-1.19854	-0.709252	STRC	Homo sapiens stereocilin (STRC), mRNA [NM_153700]	TTGCATGGGCCCAACATGAGGGAAAGGAGAGCCCAGAACAGCAAGGTCGAAGTACAGCCT	161497	NM_153700	stereocilin	chr15:43892202-43891944
A_21_P0012461	-4.80165	-2.26353	down	0.930612	1.16113	1.04966	-0.930612	-1.15831	-1.56027	XLOC_l2_010348	BROAD Institute lincRNA (XLOC_l2_010348), lincRNA [TCONS_l2_00019530]	CCCGCTGGGAAGGCTTGATAACAAAAGCAGGCTTTTACCAGACAAGCAAAGATCAAAAAA				chr3:129107942-129107883
A_32_P216872	-5.5995	-2.4853	down	1.08959	1.1318	1.07053	-1.07053	-1.24034	-1.8531	PDXDC2P	Homo sapiens mRNA; cDNA DKFZp686B0962 (from clone DKFZp686B0962). [BX647358]	GTTGGTGGCGGTAATTTTGTCCATCAAATGAATATGTGTGAAAACATTCCCTTCTTCGGC	283970	BX647358	pyridoxal-dependent decarboxylase domain containing 2, pseudogene	chr16:70010702-70010643
A_33_P3226237	-3.17131	-1.66508	down	0.140687	-0.102786	0.102786	-1.73194	-1.50443			Homo sapiens cDNA FLJ43215 fis, clone FEBRA2021908. [AK125205]	AGGGGAGGGGGCGACGGGGGCGGGGCGCGAGCCGACGGACTCCGAGGACGGTCACCGCGG		AK125205		chr2:204193090-204193031
A_33_P3400429	-3.22619	-1.68983	down	0.562491	0.907818	0.966249	-0.795522	-0.562491	-1.27492	UBE3A	ubiquitin protein ligase E3A [Source:HGNC Symbol;Acc:HGNC:12496] [ENST00000428984]	TGGGAGATACAAGTTTGGAAGCAATCTTGGGGTACTTACCCACAAGGCTGGTGGAGACCA	7337	XM_005268267	ubiquitin protein ligase E3A	chr15:25652274-25652215
A_33_P3336632	-4.08924	-2.03183	down	0.0312891	0.115818	-0.0312891	-2.24701	-1.73944		RNA28S5	Homo sapiens RNA, 28S ribosomal 5 (RNA28S5), ribosomal RNA [NR_003287]	AGTTTTACCCTACTGATGATGTGTTGTTGCCATGGTAATCCTGCTCAGTACGAGAGGAAC	100008589	NR_003287	RNA, 28S ribosomal 5	chrUn_gl000220:117900-117959
A_33_P3245484	-3.26977	-1.70919	down	1.03669	0.688007	0.883213	-0.754563	-0.688007	-1.07709	LOC100131000	Homo sapiens cDNA FLJ42370 fis, clone UTERU2030280. [AK124361]	TAATTTTTATGACCAACGGTGACCAGGCCAAGAGCAGGATGAGGTGATGGAGAATACCTT	100131000	AK124361	uncharacterized LOC100131000	chr17:76841031-76841090
A_33_P3320523	-5.89246	-2.55887	down	1.1886	1.18528	1.1496	-1.1496	-1.49156	-1.51197			CACTGGTGTGATCAGCCTTCTGGATGTCAAATATAATAGACTTTCAACAATATAAAAGTC		AK128823		chr16:32899885-32899944
A_21_P0013194	-4.24056	-2.08425	down	1.02266	0.824672	1.01879	-0.824672	-0.861079	-1.70089	LOC729737	Homo sapiens uncharacterized LOC729737 (LOC729737), long non-coding RNA [NR_039983]	TCACAATGACTCAAGCTACCACTTACTGTTGATTGTGATGACATGCCAGCTGAGGCACAT	729737	NR_039983	uncharacterized LOC729737	chr1:140265-140206
A_33_P3213892	-4.61593	-2.20662	down	0.925871	1.26935	1.12795	-0.925871	-1.00642	-1.36439	PRDM15	Homo sapiens PR domain containing 15 (PRDM15), transcript variant 3, mRNA [NM_001282934]	GACTCCAGCTCAAAAGGCATCTTAGTAATATCCATGAATCGATTTCCAATAGAGTTTTTT	63977	NM_001282934	PR domain containing 15	chr21:43220739-43220680
A_23_P79094	-3.71198	-1.89219	down	0.949207	1.06607	0.780646	-1.18159	-0.780646	-0.918418	LILRA3	Homo sapiens leukocyte immunoglobulin-like receptor, subfamily A (without TM domain), member 3 (LILRA3), transcript variant 1, mRNA [NM_006865]	CTGTGTCAGTCACAGGGAGGGATGCACACTTTCCTTTTGACCAAGGAGGGGGCAGCTGAT	11026	NM_006865	leukocyte immunoglobulin-like receptor, subfamily A (without TM domain), member 3	chr19:54802155-54802096
A_21_P0011468	-3.1363	-1.64906	down	0.79326	0.617668	0.84441	-0.720943	-0.617668	-1.35323	HERC2	Homo sapiens HECT and RLD domain containing E3 ubiquitin protein ligase 2 (HERC2), mRNA [NM_004667]	CTCCTGTCATCGAACGTTTGAGATTCCTCTCTAATGAATTGAGACCTGCTGTTGGTAATG	8924	NM_004667	HECT and RLD domain containing E3 ubiquitin protein ligase 2	chr15:28478447-28478388
A_33_P3344229	-6.03249	-2.59275	down	1.16879	1.21006	1.30321	-1.55254	-1.16879	-1.37487	HIST1H4A	Homo sapiens histone cluster 1, H4a (HIST1H4A), mRNA [NM_003538]	AGCGCCAGGGACGCACCCTTTATGGCTTTGGCGGTTAAGGTTGCTGATTTCTCCACAGCT	8359	NM_003538	histone cluster 1, H4a	chr6:26022181-26022240
A_23_P303851	-3.5023	-1.8083	down	0.6474	1.23801	0.69736	-1.29094	-0.903783	-0.6474	TAS2R45	Homo sapiens taste receptor, type 2, member 45 (TAS2R45), mRNA [NM_176886]	AATGTACCTTTCAGATACGACTGTAACCATGCTAGCAAACTTAGTACCCTTTACTGTAAC	259291	NM_176886	taste receptor, type 2, member 45
A_19_P00316286	-5.80186	-2.53652	down	0.981024	0.946998	1.35253	-1.41963	-0.946998	-1.96238	LOC401320	Homo sapiens uncharacterized LOC401320 (LOC401320), long non-coding RNA [NR_038889]	TTGACTGGGGAGAATCTGGAGAGGATTTAATTAATTTGGCAAAAGGATTAGCAATTGAAT	401320	NR_038889	uncharacterized LOC401320	chr7:30589618-30589559
A_33_P3406047	-6.37013	-2.67132	down	1.234	1.08589	1.19371	-1.08589	-1.4491	-1.96538	NLRP4	Homo sapiens NLR family, pyrin domain containing 4 (NLRP4), mRNA [NM_134444]	GATACAAATCATTGATACTCTGAGTTGTGAGATTTCTGGCACCCCATTCATAGATTTGAT	147945	NM_134444	NLR family, pyrin domain containing 4	chr19:56393036-56393095
A_24_P626951	-3.08479	-1.62517	down	0.843043	0.780828	0.677128	-0.677128	-0.79267	-1.10472		immunoglobulin kappa variable 1-16 [Source:HGNC Symbol;Acc:HGNC:5732] [ENST00000479981]	GACAGAGTCACCATCACTTGTCGGGCGAGTCAGGGAATTAGCAATTATTTAGCCTGGTTT		AF078945		chr2:89399588-89399529
A_23_P153897	-3.01574	-1.59251	down	0.785907	0.669558	0.631526	-0.631526	-0.793908	-1.26511	GNG7	Homo sapiens guanine nucleotide binding protein (G protein), gamma 7 (GNG7), mRNA [NM_052847]	CCCTGCCTCGGAGAACCCCTTTAAGGACAAGAAACCTTGTATTATTTTATAACTGTGTTC	2788	NM_052847	guanine nucleotide binding protein (G protein), gamma 7	chr19:2515071-2515012
A_33_P3357337	-3.2391	-1.69559	down	0.743904	0.776601	0.661098	-0.661098	-1.22058	-1.02349	CCNC	Homo sapiens cyclin C, mRNA (cDNA clone IMAGE:4250420), partial cds. [BC026272]	CTGTGCCAATGCAGTGGCATTGGTACCAAGGTAAAATACAAGGAATTTAAGGACAAAAAA	892	BC026272	cyclin C	chr6:100005205-100005146
A_33_P3329013	-3.59626	-1.8465	down	1.01807	0.701784	0.76869	-0.701784	-0.910178	-1.43898	SSTR2	Homo sapiens somatostatin receptor 2 (SSTR2), mRNA [NM_001050]	CAAAGTCTGGAGAAGAGGGATCATGCCTGGATATGATCTTTAGAAACAACAAAAATAGAA	6752	NM_001050	somatostatin receptor 2	chr17:71166803-71166862
A_24_P693321	-4.88903	-2.28955	down	1.04418	1.17689	1.19193	-1.04418	-1.06479	-1.34669	LOC100190986	Homo sapiens uncharacterized LOC100190986 (LOC100190986), long non-coding RNA [NR_024456]	ATCACAACTATGCCAAATAATCAATCCTACAATGTCCAAAATTTTACTTTAAAACTGGAA	100190986	NR_024456	uncharacterized LOC100190986	chr16:21876568-21876509
A_24_P694820	-3.4973	-1.80624	down	0.817457	0.739044	0.792929	-0.739044	-0.792096	-1.53815	lnc-ZNF236-1	LNCipedia lincRNA (lnc-ZNF236-1), lincRNA [lnc-ZNF236-1:5]	GCCGCTGTCTAAGAGTTAAGGGTTTTCTGGGTGACGTTTAACAATAATAAAGGTGACTGC			lnc-ZNF236-1:5	chr18:74696037-74696096
A_21_P0014428	-4.16311	-2.05766	down	0.911425	0.858798	0.934338	-0.858798	-1.12226	-1.48736	LOC101927372	PREDICTED: Homo sapiens uncharacterized LOC101927372 (LOC101927372), ncRNA [XR_244439]	ACGAGAGCCCATGACCTCCGAAATCCATGGCAACGTAATAAAAGTCTGAAACAGAGAGAA	101927372	XR_244439	uncharacterized LOC101927372	chr22:42897969-42897910
A_21_P0013898	-3.18994	-1.67353	down	0.769505	0.846993	0.638102	-1.13261	-0.638102	-0.995271		protein phosphatase 1, regulatory subunit 12B pseudogene, Y-linked 1 [Source:HGNC Symbol;Acc:HGNC:18498] [ENST00000367272]	TGAGAGTTCAAAGACTACCACAAACACTACAACTGCAAAGGAAATGGACAAAAATGAATG				chrY:28425468-28425324
